# Supplementary material for: A theoretical approach to investigating the mechanism of action and efficiency of N-heterocyclic olefins as organic catalysts for transesterification reactions
Source: Royal Society of Chemistry journal article supplement (doi:10.1039/d1nj05589e), 2022-01-01
Supplement: d1nj05589e1.pdf [file d1nj05589e1.pdf]

## **Supporting information for:**

A Theoretical Approach to Investigating the Mechanism of Action and Efficiency of N-Heterocyclic Olefins as Organic Catalysts for Transesterification Reactions

Fatemeh Pirouzi, Hossein Eshghi and Hossein Sabet-Sarvestani

Department of Chemistry, Faculty of Science, Ferdowsi University of Mashhad, Mashhad, Iran

**For publication in the New Journal of Chemistry**

|             |              | Zwitterionic pathway<br>M062X, 6-311++G(2d,p) |          |               |               | Anionic pathway<br>M062X, 6-311++G(2d,p) |          |              |               |
|-------------|--------------|-----------------------------------------------|----------|---------------|---------------|------------------------------------------|----------|--------------|---------------|
| NHO         |              | G                                             | H        | S             | E             | G                                        | H        | S            | E             |
| 1a          | Step1-reacs  | -882.479608                                   | -882.405 | 156.369       | -882.7845614  | -577.478374                              | -577.415 | 133.786      | -577.7255468  |
|             | TS1          | -882.457917                                   | -882.387 | 149.582       | -882.7650465  | -577.458907                              | -577.399 | 125.304      | -577.7050773  |
|             | Step1-prods  | -882.469401                                   | -882.398 | 149.755       | -882.7790282  | -577.474896                              | -577.417 | 122.074      | -577.7282887  |
|             | Step2-reacs  | -1037.436205                                  | -1037.35 | 178.005       | -1037.8202813 | -1037.43265                              | -1037.35 | 172.832      | -1037.8184586 |
|             | TS2          | -1037.415590                                  | -1037.33 | 174.609       | -1037.7996631 | -1037.41204                              | -1037.33 | 173.942      | -1037.7954445 |
|             | Step2-int    | -1037.420701                                  | -1037.33 | 182.487       | -1037.800301  | -1037.42815                              | -1037.35 | 174.126      | -1037.8131341 |
|             | TS3          | -1037.412756                                  | -1037.33 | 176.349       | -1037.7957223 | -1037.41965                              | -1037.34 | 170.789      | -1037.8044201 |
|             | step2-prods  | -1037.439219                                  | -1037.36 | 177.024       | -1037.8235164 | -1037.43427                              | -1037.35 | 173.585      | -1037.8195957 |
|             | Step3-reacs  | -921.751573                                   | -921.677 | 156.34        | -922.0877693  | -538.190454                              | -538.137 | 111.597      | -538.4194329  |
|             | TS4          | -921.738203                                   | -921.667 | 150.799       | -922.0749957  | -538.175798                              | -538.119 | 118.988      | -538.3953386  |
| Step3-prods | -921.763925  | -921.689                                      | 157.728  | -922.0974105  | -538.195942   | -538.136                                 | 127.096  | -538.4165544 |               |
| 2a          | Step1-reacs  | -961.020024                                   | -960.94  | 169.38        | -961.3786828  | -656.017273                              | -655.946 | 150.481      | -656.3163914  |
|             | TS1          | -960.992847                                   | -960.92  | 152.327       | -961.3591118  | -656.003172                              | -655.936 | 141.088      | -656.3014136  |
|             | Step1-prods  | -961.007418                                   | -960.935 | 153.209       | -961.3750253  | -656.027282                              | -655.964 | 133.577      | -656.3350678  |
|             | Step2-reacs  | -1115.976025                                  | -1115.89 | 182.777       | -1116.4172644 | -1115.985791                             | -1115.9  | 182.829      | -1116.4262769 |
|             | TS2          | -1115.954181                                  | -1115.87 | 181.215       | -1116.3950032 | -1115.958436                             | -1115.87 | 179.781      | -1116.3992575 |
|             | Step2-int    | -1115.955517                                  | -1115.87 | 185.858       | -1116.3927637 | -1115.977653                             | -1115.89 | 180.905      | -1116.4201766 |
|             | TS3          | -1115.950831                                  | -1115.86 | 183.787       | -1116.3894223 | -1115.969161                             | -1115.88 | 181.396      | -1116.4091294 |
|             | step2-prods  | -1115.976659                                  | -1115.89 | 179.642       | -1116.4198132 | -1115.987161                             | -1115.9  | 182.6        | -1116.4277641 |
|             | Step3-reacs  | -1000.288816                                  | -1000.21 | 158.707       | -1000.6838982 | -616.744352                              | -616.685 | 125.904      | -617.0261194  |
|             | TS4          | -1000.275350                                  | -1000.2  | 157.871       | -1000.6686025 | -616.719928                              | -616.657 | 132.377      | -616.9927813  |
| Step3-prods | -1000.302547 | -1000.22                                      | 178.327  | -1000.6867782 | -616.735441   | -616.67                                  | 137.887  | -617.0111037 |               |
| 1b          | Step1-reacs  | -805.097226                                   | -805.031 | 140.435       | -805.3754355  | -500.096208                              | -500.039 | 119.554      | -500.3159922  |
|             | TS1          | -805.065295                                   | -805     | 137.643       | -805.3432465  | -500.063447                              | -500.008 | 116.435      | -500.2798884  |
|             | Step1-prods  | -805.070997                                   | -805.006 | 137.053       | -805.3515908  | -500.098200                              | -500.048 | 105.662      | -500.3249779  |
|             | Step2-reacs  | -960.038038                                   | -959.96  | 164.998       | -960.3932032  | -960.057722                              | -959.983 | 156.317      | -960.416697   |
|             | TS2          | -960.020285                                   | -959.942 | 164.304       | -960.3743703  | -960.019919                              | -959.945 | 157.645      | -960.3760157  |
|             | Step2-int    | -960.026619                                   | -959.942 | 177.177       | -960.3727061  | -960.028344                              | -959.953 | 159.346      | -960.3857855  |
|             | TS3          | -960.015848                                   | -959.938 | 164.102       | -960.3695802  | -960.022001                              | -959.945 | 161.073      | -960.3766156  |
|             | step2-prods  | -960.041383                                   | -959.964 | 162.112       | -960.397868   | -960.059177                              | -959.983 | 160.174      | -960.4159109  |
|             | Step3-reacs  | -844.354802                                   | -844.285 | 145.925       | -844.6606073  | -460.815541                              | -460.769 | 98.972       | -461.0159996  |
|             | TS4          | -844.346768                                   | -844.279 | 141.941       | -844.6521286  | -460.781613                              | -460.729 | 111.091      | -460.9709983  |
| Step3-prods | -844.379501  | -844.309                                      | 148.306  | -844.6838359  | -460.812703   | -460.759                                 | 112.073  | -461.0062365 |               |
| 2b          | Step1-reacs  | -883.642492                                   | -883.566 | 160.532       | -883.9700699  | -578.639386                              | -578.577 | 131.329      | -578.9130007  |
|             | TS1          | -883.599398                                   | -883.532 | 142.277       | -883.935238   | -578.608705                              | -578.547 | 129.22       | -578.8779359  |
|             | Step1-prods  | -883.608593                                   | -883.54  | 144.049       | -883.9453824  | -578.651705                              | -578.596 | 117.402      | -578.9324638  |
|             | Step2-reacs  | -1038.576016                                  | -1038.49 | 171.531       | -1038.9875476 | -1038.610537                             | -1038.53 | 168.524      | -1039.0234448 |
|             | TS2          | -1038.554802                                  | -1038.47 | 169.689       | -1038.9656346 | -1038.566953                             | -1038.49 | 171.303      | -1038.9772306 |
|             | Step2-int    | -1038.560105                                  | -1038.47 | 180.6         | -1038.9645297 | -1038.579598                             | -1038.5  | 172.623      | -1038.9906371 |
|             | TS3          | -1038.553141                                  | -1038.47 | 172.526       | -1038.962699  | -1038.572116                             | -1038.49 | 172.774      | -1038.9808793 |
|             | step2-prods  | -1038.578077                                  | -1038.5  | 167.689       | -1038.9915479 | -1038.611923                             | -1038.53 | 169.673      | -1039.0242429 |
|             | Step3-reacs  | -922.891737                                   | -922.82  | 151.944       | -923.2543041  | -539.369452                              | -539.316 | 111.601      | -539.6233835  |
|             | TS4          | -922.879750                                   | -922.811 | 145.726       | -923.2442541  | -539.325997                              | -539.268 | 121.558      | -539.5691587  |
| Step3-prods | -922.923098  | -922.846                                      | 162.588  | -923.2798137  | -539.357944   | -539.299                                 | 124.436  | -539.6051539 |               |
| 1c          | Step1-reacs  | -844.370780                                   | -844.304 | 140.913       | -844.6793004  | -539.369012                              | -539.312 | 119.384      | -539.6202172  |
|             | TS1          | -844.338902                                   | -844.272 | 140.565       | -844.6466209  | -539.341765                              | -539.283 | 124.442      | -539.5854683  |
|             | Step1-prods  | -844.346032                                   | -844.279 | 141.069       | -844.6558202  | -539.376287                              | -539.324 | 109.687      | -539.6318695  |
|             | Step2-reacs  | -999.312561                                   | -999.235 | 162.743       | -999.6996051  | -999.336031                              | -999.26  | 159.927      | -999.723689   |
|             | TS2          | -999.294866                                   | -999.216 | 166.501       | -999.6781108  | -999.295639                              | -999.219 | 160.957      | -999.6815609  |
|             | Step2-int    | -999.300577                                   | -999.217 | 175.807       | -999.6793844  | -999.305299                              | -999.228 | 162.306      | -999.6921085  |
|             | TS3          | -999.294621                                   | -999.214 | 168.816       | -999.6765908  | -999.297974                              | -999.218 | 167.633      | -999.6800432  |
|             | step2-prods  | -999.317565                                   | -999.237 | 170.081       | -999.7008465  | -999.340401                              | -999.262 | 165.695      | -999.724835   |
|             | Step3-reacs  | -883.630047                                   | -883.558 | 151.533       | -883.9643079  | -500.094548                              | -500.045 | 103.564      | -500.3230401  |
|             | TS4          | -883.619913                                   | -883.552 | 143.798       | -883.9563133  | -500.058378                              | -500.003 | 116.053      | -500.2763233  |
| Step3-prods | -883.654870  | -883.584                                      | 148.586  | -883.98984    | -500.087432   | -500.033                                 | 115.011  | -500.3104084 |               |
| 2c          | Step1-reacs  | -922.914378                                   | -922.838 | 161.152       | -923.2718057  | -617.915470                              | -617.85  | 137.27       | -618.2161763  |
|             | TS1          | -922.861586                                   | -922.793 | 143.379       | -923.227849   | -617.880084                              | -617.818 | 131.573      | -618.1787023  |
|             | Step1-prods  | -922.873218                                   | -922.803 | 147.02        | -923.2394745  | -617.919636                              | -617.862 | 121.528      | -618.2288836  |
|             | Step2-reacs  | -1077.843669                                  | -1077.76 | 173.815       | -1078.284709  | -1077.879237                             | -1077.8  | 176.226      | -1078.3187057 |

|    |             |              |          |         |               |              |          |         |               |
|----|-------------|--------------|----------|---------|---------------|--------------|----------|---------|---------------|
|    | TS2         | -1077.818694 | -1077.74 | 174.68  | -1078.2579474 | -1077.841474 | -1077.76 | 174.715 | -1078.2806158 |
|    | Step2-int   | -1077.827006 | -1077.74 | 178.485 | -1078.2624666 | -1077.850110 | -1077.77 | 174.138 | -1078.2910802 |
|    | TS3         | -1077.819219 | -1077.74 | 176.749 | -1078.2570899 | -1077.843143 | -1077.76 | 174.626 | -1078.2824686 |
|    | step2-prods | -1077.845303 | -1077.76 | 178.029 | -1078.2843571 | -1077.880563 | -1077.8  | 174.929 | -1078.3203991 |
|    | Step3-reacs | -962.154939  | -962.082 | 152.959 | -962.5482646  | -578.636670  | -578.582 | 114.046 | -578.9197306  |
|    | TS4         | -962.144314  | -962.072 | 151.407 | -962.5363382  | -578.597077  | -578.538 | 123.763 | -578.8696912  |
|    | Step3-prods | -962.198305  | -962.119 | 166.782 | -962.5825558  | -578.632256  | -578.571 | 128.778 | -578.9071995  |
|    |             |              |          |         |               |              |          |         |               |
| 1d | Step1-reacs | -803.910817  | -803.843 | 141.947 | -804.1632416  | -498.909042  | -498.852 | 119.169 | -499.1038243  |
|    | TS1         | -803.887177  | -803.824 | 133.042 | -804.1430029  | -498.889067  | -498.836 | 111.931 | -499.0823153  |
|    | Step1-prods | -803.898700  | -803.834 | 136.677 | -804.155436   | -498.904670  | -498.854 | 106.002 | -499.1067171  |
|    | Step2-reacs | -958.864639  | -958.788 | 161.937 | -959.1970655  | -958.860393  | -958.784 | 161.674 | -959.1921954  |
|    | TS2         | -958.845530  | -958.768 | 162.852 | -959.1757937  | -958.841422  | -958.767 | 156.09  | -959.1745589  |
|    | Step2-int   | -958.848727  | -958.77  | 165.418 | -959.1774943  | -958.857470  | -958.782 | 159.763 | -959.1900244  |
|    | TS3         | -958.841321  | -958.764 | 162.441 | -959.1716737  | -958.846056  | -958.772 | 156.711 | -959.1788347  |
|    | step2-prods | -958.868194  | -958.79  | 164.305 | -959.1992016  | -958.859300  | -958.783 | 160.283 | -959.191818   |
|    | Step3-reacs | -843.180197  | -843.113 | 141.91  | -843.464104   | -459.622652  | -459.575 | 100.021 | -459.7977926  |
|    | TS4         | -843.169102  | -843.104 | 137.479 | -843.4526261  | -459.606405  | -459.556 | 106.216 | -459.7727389  |
|    | Step3-prods | -843.194044  | -843.124 | 146.398 | -843.4738212  | -459.626114  | -459.573 | 111.412 | -459.7949576  |
|    |             |              |          |         |               |              |          |         |               |
| 1e | Step1-reacs | -882.471986  | -882.399 | 154.029 | -882.7781861  | -577.468262  | -577.408 | 127.107 | -577.7189012  |
|    | TS1         | -882.450343  | -882.381 | 146.772 | -882.7586745  | -577.450918  | -577.392 | 124.379 | -577.6976291  |
|    | Step1-prods | -882.461040  | -882.391 | 147.179 | -882.7716486  | -577.463381  | -577.407 | 119.218 | -577.7185336  |
|    | Step2-reacs | -1037.428704 | -1037.34 | 176.632 | -1037.8131748 | -1037.421399 | -1037.34 | 171.682 | -1037.8075876 |
|    | TS2         | -1037.407497 | -1037.33 | 170.891 | -1037.7932195 | -1037.404267 | -1037.33 | 166.367 | -1037.7917475 |
|    | Step2-int   | -1037.412598 | -1037.33 | 180.087 | -1037.7930962 | -1037.415010 | -1037.34 | 165.544 | -1037.8050859 |
|    | TS3         | -1037.407859 | -1037.33 | 173.505 | -1037.7917536 | -1037.406589 | -1037.33 | 166.391 | -1037.7941769 |
|    | step2-prods | -1037.427709 | -1037.35 | 170.542 | -1037.8155202 | -1037.425445 | -1037.34 | 180.445 | -1037.8070727 |
|    | Step3-reacs | -921.742348  | -921.67  | 152.789 | -922.0803704  | -538.180760  | -538.128 | 111.404 | -538.4096305  |
|    | TS4         | -921.731550  | -921.661 | 149.325 | -922.0684405  | -538.167397  | -538.111 | 117.863 | -538.3874603  |
|    | Step3-prods | -921.755314  | -921.68  | 158.929 | -922.0881931  | -538.185774  | -538.128 | 121.831 | -538.4093557  |

**Cartesian coordinate of the optimized species and imaginary frequency of TSs computed at M06-2X/6-311++G (2d, p) level of Density Functional Theory:**

**Methyl benzoate**

|     |             |             |             |
|-----|-------------|-------------|-------------|
| 0 1 |             |             |             |
| C   | -0.74776300 | -1.17483100 | -0.00030900 |
| C   | -2.12189300 | -1.36920800 | 0.00004800  |
| C   | -2.98021500 | -0.27570700 | 0.00041900  |
| C   | -2.46582000 | 1.01642800  | 0.00043200  |
| C   | -1.09368400 | 1.21438500  | 0.00007700  |
| C   | -0.23321900 | 0.11961700  | -0.00030800 |
| H   | -0.07457300 | -2.02129400 | -0.00060400 |
| H   | -2.52326600 | -2.37441800 | 0.00003700  |
| H   | -4.05187900 | -0.43084500 | 0.00070000  |
| H   | -3.13434700 | 1.86767700  | 0.00071900  |
| H   | -0.67482300 | 2.21235000  | 0.00007500  |
| C   | 1.23279200  | 0.38354600  | -0.00073900 |
| O   | 1.71986200  | 1.48796500  | -0.00002000 |
| O   | 1.96232100  | -0.73385900 | -0.00021800 |
| C   | 3.38020900  | -0.54188300 | 0.00031800  |
| H   | 3.68295200  | 0.00865700  | 0.88941800  |
| H   | 3.81238500  | -1.53746400 | 0.00063200  |
| H   | 3.68364600  | 0.00840100  | -0.88870300 |

**Ethyl benzoate**

|     |             |             |             |
|-----|-------------|-------------|-------------|
| 0 1 |             |             |             |
| C   | 2.29856700  | -1.57439000 | 0.00013200  |
| C   | 0.97757200  | -1.14908100 | 0.00012300  |
| C   | 0.69090300  | 0.21435800  | -0.00003500 |
| C   | 1.72509000  | 1.14650400  | -0.00018100 |
| C   | 3.04351700  | 0.71821400  | -0.00017200 |
| C   | 3.33022500  | -0.64282800 | -0.00001600 |
| H   | 2.52332000  | -2.63335300 | 0.00025200  |
| H   | 0.16946900  | -1.86816800 | 0.00023700  |
| H   | 1.48148900  | 2.20114300  | -0.00030200 |
| H   | 3.84798100  | 1.44250800  | -0.00028900 |
| H   | 4.35998800  | -0.97825600 | -0.00001100 |
| C   | -0.70940500 | 0.72517700  | -0.00006000 |
| O   | -0.99668100 | 1.89846800  | -0.00020700 |
| O   | -1.61852500 | -0.24984500 | 0.00006900  |

|   |             |             |             |
|---|-------------|-------------|-------------|
| C | -2.99510700 | 0.17154200  | 0.00002200  |
| H | -3.16836000 | 0.78673600  | 0.88364800  |
| H | -3.16839300 | 0.78641700  | -0.88382100 |
| C | -3.84831600 | -1.07321000 | 0.00025900  |
| H | -4.90170400 | -0.79237500 | 0.00020400  |
| H | -3.65020700 | -1.67584500 | -0.88629200 |
| H | -3.65021200 | -1.67550600 | 0.88704100  |

**Ethanol**

|     |             |             |             |
|-----|-------------|-------------|-------------|
| 0 1 |             |             |             |
| C   | -1.20678800 | -0.24275100 | -0.02169000 |
| H   | -1.25290800 | -0.96931800 | 0.79273000  |
| H   | -1.27089500 | -0.77957000 | -0.96903200 |
| H   | -2.07209100 | 0.41668100  | 0.06452500  |
| C   | 0.07831600  | 0.55930000  | 0.04737100  |
| H   | 0.12064900  | 1.28368400  | -0.76650900 |
| H   | 0.13288800  | 1.11437800  | 0.98918300  |
| O   | 1.23404200  | -0.25721900 | -0.10829300 |
| H   | 1.24085200  | -0.90739600 | 0.60136300  |

**Methanol**

|     |             |             |             |
|-----|-------------|-------------|-------------|
| 0 1 |             |             |             |
| C   | -0.04718700 | 0.66492200  | 0.00000000  |
| H   | 0.44199600  | 1.06647500  | 0.89058800  |
| H   | 0.44199600  | 1.06647500  | -0.89058800 |
| H   | -1.08810100 | 0.98311500  | 0.00000000  |
| O   | -0.04718700 | -0.75571100 | 0.00000000  |
| H   | 0.86472100  | -1.05990900 | 0.00000000  |

**Ethoxide ion**

|      |             |             |             |
|------|-------------|-------------|-------------|
| -1 1 |             |             |             |
| C    | 1.17225100  | -0.20955000 | -0.00002400 |
| H    | 1.25884200  | -0.84840200 | -0.88393900 |
| H    | 1.25807000  | -0.84905900 | 0.88351000  |
| H    | 2.00869500  | 0.49884200  | 0.00067600  |
| C    | -0.19442600 | 0.49732400  | -0.00006800 |
| H    | -0.18704200 | 1.18535900  | 0.87954100  |
| H    | -0.18669200 | 1.18624000  | -0.87893600 |
| O    | -1.25235300 | -0.36245400 | -0.00003700 |

**Methoxide ion**

|      |             |            |             |
|------|-------------|------------|-------------|
| -1 1 |             |            |             |
| C    | -0.56217900 | 0.00001700 | 0.00002100  |
| H    | -1.02093900 | 0.84892300 | -0.55934400 |

|   |             |             |             |
|---|-------------|-------------|-------------|
| H | -1.02086300 | 0.05983400  | 1.01478000  |
| H | -1.02059100 | -0.90900500 | -0.45557600 |
| O | 0.80443300  | 0.00001800  | 0.00000200  |

|   |             |             |             |
|---|-------------|-------------|-------------|
| H | -2.30152800 | 2.04358200  | 0.88335800  |
| H | -1.11906700 | 3.03552200  | 0.03038400  |
| H | -2.28298600 | 2.07119800  | -0.88117200 |
| H | 1.11933300  | 3.03543300  | 0.02985100  |
| H | 2.30149900  | 2.04361600  | 0.88339700  |
| H | 2.28341100  | 2.07080200  | -0.88113800 |
| H | 2.56956300  | -1.40038700 | 1.00857300  |
| H | 2.65484500  | -1.57980900 | -0.75401700 |
| H | 3.14111800  | -0.05304100 | -0.00034700 |
| H | -0.93024900 | -3.11980300 | 0.00907100  |
| H | 0.92997500  | -3.11988700 | 0.00880000  |
| H | -3.14112500 | -0.05275400 | -0.00069700 |
| H | -2.65474200 | -1.57952600 | -0.75433000 |
| H | -2.57002600 | -1.40021800 | 1.00829600  |

### The hemiacetal anion (anionic mechanism)

-1 1

|   |             |             |             |
|---|-------------|-------------|-------------|
| C | 3.01284200  | -0.28040200 | 1.06480800  |
| C | 1.69299400  | 0.14704800  | 1.18736800  |
| C | 0.79538100  | -0.01056600 | 0.14078600  |
| C | 1.23832800  | -0.60159200 | -1.04124300 |
| C | 2.55250000  | -1.03148100 | -1.17080400 |
| C | 3.44630400  | -0.87165400 | -0.11477900 |
| H | 3.70394300  | -0.15046600 | 1.88967200  |
| H | 1.33413200  | 0.61283300  | 2.09698400  |
| H | 0.53942200  | -0.71798200 | -1.86066700 |
| H | 2.88478000  | -1.48992800 | -2.09519200 |
| H | 4.47240200  | -1.20503100 | -0.21417900 |
| C | -0.66329300 | 0.47477500  | 0.29954200  |
| O | -0.93281600 | 1.08168800  | 1.39763500  |
| O | -1.43969000 | -0.72641700 | 0.03274800  |
| C | -2.82267500 | -0.56299100 | 0.26233200  |
| H | -3.21116500 | 0.25514000  | -0.35417500 |
| H | -3.00006100 | -0.30114900 | 1.30931700  |
| C | -0.42574700 | 2.56827900  | -0.84694900 |
| H | -0.84891300 | 3.13244400  | -0.01191500 |
| H | -0.66488900 | 3.07558300  | -1.78329600 |
| O | -0.95941400 | 1.27231400  | -0.91652900 |
| H | 0.66681600  | 2.54945100  | -0.73104700 |
| C | -3.51705400 | -1.86460800 | -0.08680600 |
| H | -3.13255800 | -2.68024100 | 0.52847900  |
| H | -3.35405700 | -2.12064500 | -1.13528500 |
| H | -4.59196300 | -1.78153900 | 0.08495000  |

### NHO 1b

0 1

|   |             |             |             |
|---|-------------|-------------|-------------|
| C | 0.00000000  | 0.67859200  | 0.00000000  |
| C | 0.74955000  | -1.50599700 | 0.12065600  |
| C | -0.74954900 | -1.50599700 | -0.12065600 |
| N | -1.09258800 | -0.14455300 | 0.27458400  |
| N | 1.09258800  | -0.14455200 | -0.27458400 |
| C | -0.00000100 | 2.02527400  | 0.00000000  |
| C | -2.42393900 | 0.32518900  | -0.03837600 |
| C | 2.42393900  | 0.32519000  | 0.03837700  |
| H | -3.14321200 | -0.43729900 | 0.25946500  |
| H | -2.64605900 | 1.23333600  | 0.52066600  |
| H | -2.54472400 | 0.53110200  | -1.11004200 |
| H | 3.14321200  | -0.43729600 | -0.25946800 |
| H | 2.64605800  | 1.23334000  | -0.52066100 |
| H | 2.54472500  | 0.53109800  | 1.11004400  |
| H | -0.91073100 | 2.57606100  | 0.17355700  |
| H | 0.91072900  | 2.57606200  | -0.17355800 |
| H | 0.97304200  | -1.68329800 | 1.18173200  |
| H | -0.97304200 | -1.68329900 | -1.18173200 |
| H | 1.28676700  | -2.23479000 | -0.48493900 |
| H | -1.28676600 | -2.23479100 | 0.48493900  |

### Catalysts:

#### NHO 1a

0 1

|   |             |             |             |
|---|-------------|-------------|-------------|
| C | -0.00005300 | -1.21242800 | -0.05407700 |
| C | -0.67338700 | 0.96158700  | -0.00215300 |
| C | 0.67348900  | 0.96153100  | -0.00228200 |
| N | 1.09337900  | -0.37714400 | -0.07226200 |
| N | -1.09340300 | -0.37704100 | -0.07199200 |
| C | -0.00011400 | -2.57461600 | 0.00160900  |
| C | 2.43662800  | -0.87904300 | 0.05512500  |
| C | -2.43672900 | -0.87882500 | 0.05492700  |
| C | -1.64793300 | 2.08468100  | 0.00847300  |
| C | 1.64812400  | 2.08454000  | 0.00833700  |

#### NHO 1c

0 1

|   |             |            |             |
|---|-------------|------------|-------------|
| C | 1.23330400  | 1.27642300 | 0.25670700  |
| C | -0.00020500 | 2.06363300 | -0.13195000 |
| C | -1.23354400 | 1.27618400 | 0.25676100  |
| H | -0.00028800 | 3.03134100 | 0.37174300  |
| H | 1.31660500  | 1.22315800 | 1.35438400  |
| H | 2.13494500  | 1.76208900 | -0.11813100 |
| H | -1.31679100 | 1.22289800 | 1.35444200  |

|   |             |             |             |
|---|-------------|-------------|-------------|
| H | -2.13529600 | 1.76167800  | -0.11803700 |
| C | 0.00008300  | -0.79210500 | -0.06769900 |
| C | 0.00032000  | -2.09392300 | 0.28637200  |
| H | 0.91948500  | -2.64017900 | 0.41277700  |
| H | -0.91861400 | -2.64052900 | 0.41288100  |
| N | -1.18176600 | -0.07029900 | -0.31526000 |
| N | 1.18175400  | -0.07007100 | -0.31531000 |
| C | 2.42198200  | -0.79241700 | -0.10631000 |
| H | 2.55957900  | -1.10066800 | 0.93979400  |
| H | 2.45327300  | -1.67910400 | -0.73807200 |
| H | 3.24900000  | -0.14184000 | -0.38722900 |
| C | -2.42192600 | -0.79278800 | -0.10633000 |
| H | -2.45314900 | -1.67940800 | -0.73818300 |
| H | -2.55950300 | -1.10114600 | 0.93974500  |
| H | -3.24899900 | -0.14225300 | -0.38719100 |
| H | -0.00024500 | 2.23650900  | -1.21024800 |

|   |             |             |             |
|---|-------------|-------------|-------------|
| C | -1.77246700 | 0.31436300  | -0.23934300 |
| H | 3.43220800  | 0.60614700  | -0.90018400 |
| H | 1.74022000  | 2.41392800  | -0.49959700 |
| H | -0.11426400 | 2.51629500  | -0.57065900 |
| H | -1.73830500 | 1.07495900  | -1.02534800 |
| H | -0.75810900 | -2.31379400 | 0.28504400  |
| H | 1.96666900  | -2.36752300 | 0.46662600  |
| H | 3.77527200  | -0.66517600 | 0.29159500  |
| C | -2.19247800 | 0.96972300  | 1.07397600  |
| H | -3.16879700 | 1.44474000  | 0.96544600  |
| H | -2.26023600 | 0.21331900  | 1.85957500  |
| H | -1.46794000 | 1.72556100  | 1.37873300  |
| H | 3.25969500  | 0.94809000  | 0.83198900  |
| C | -2.75400700 | -0.76762900 | -0.66442400 |
| H | -2.88444500 | -1.51502500 | 0.12082200  |
| H | -3.72674200 | -0.31289100 | -0.85159800 |
| H | -2.42292500 | -1.26757500 | -1.57549100 |

### NHO 1d

0 1

|   |             |             |             |
|---|-------------|-------------|-------------|
| C | 0.00000000  | 0.62313100  | -0.00013700 |
| C | 0.67157700  | -1.54245900 | 0.00004300  |
| C | -0.67157600 | -1.54245900 | 0.00006000  |
| N | -1.09323400 | -0.21585500 | -0.00013800 |
| N | 1.09323400  | -0.21585500 | -0.00013900 |
| C | 0.00000000  | 1.98580900  | 0.00018400  |
| C | -2.44916900 | 0.26648700  | 0.00004800  |
| C | 2.44916900  | 0.26648800  | 0.00005400  |
| H | -2.63970400 | 0.87561400  | 0.88756100  |
| H | -2.63959200 | 0.87637400  | -0.88695900 |
| H | -3.12684300 | -0.58399100 | -0.00038100 |
| H | 0.93067600  | 2.53017900  | -0.00014500 |
| H | -0.93067800 | 2.53017800  | -0.00016700 |
| H | 3.12684300  | -0.58399000 | -0.00049200 |
| H | 2.63955500  | 0.87646600  | -0.88689800 |
| H | 2.63974200  | 0.87552400  | 0.88762100  |
| H | 1.37274700  | -2.35818200 | 0.00011600  |
| H | -1.37274600 | -2.35818300 | 0.00017000  |

### NHO 1e

0 1

|   |             |             |             |
|---|-------------|-------------|-------------|
| C | 0.70668600  | 0.58632100  | -0.21039600 |
| C | 1.29669600  | -1.55030500 | 0.26487000  |
| C | -0.04259500 | -1.51969800 | 0.17469700  |
| N | -0.41814200 | -0.21444200 | -0.14417000 |
| N | 1.76661200  | -0.26556500 | 0.01619500  |
| C | 0.77936500  | 1.92815700  | -0.44138500 |
| C | 3.13353500  | 0.18223400  | 0.06181500  |

### NHO 2a

0 1

|   |             |             |             |
|---|-------------|-------------|-------------|
| C | -0.65758600 | 0.00001100  | 0.00000100  |
| C | 1.52131500  | -0.65684100 | 0.11503000  |
| C | 1.52131000  | 0.65684700  | -0.11492700 |
| N | 0.17752000  | 1.12381100  | -0.22235500 |
| N | 0.17750700  | -1.12384000 | 0.22229400  |
| C | -2.00442900 | -0.00002100 | 0.00007700  |
| C | -0.11394900 | 2.33764400  | 0.53831800  |
| C | -0.11388000 | -2.33744800 | -0.53879400 |
| C | 2.65765000  | -1.60845700 | 0.25557300  |
| C | 2.65767500  | 1.60844000  | -0.25538300 |
| H | 2.71177800  | -2.30808400 | -0.58204900 |
| H | 3.60219500  | -1.07024000 | 0.30513900  |
| H | 2.54989800  | -2.19705400 | 1.17018200  |
| H | 3.60224800  | 1.07020200  | -0.30415400 |
| H | 2.55041400  | 2.19655300  | -1.17036300 |
| H | 2.71133800  | 2.30850300  | 0.58189800  |
| H | 0.56272400  | 3.12968400  | 0.22157400  |
| H | -1.12872500 | 2.67255000  | 0.35395200  |
| H | 0.01219000  | 2.16867600  | 1.61517800  |
| H | 0.56320100  | -3.12937400 | -0.22263900 |
| H | -1.12846800 | -2.67279300 | -0.35415000 |
| H | 0.01179400  | -2.16798900 | -1.61562400 |
| C | -2.80837500 | 1.14222000  | -0.56027100 |
| H | -3.22515900 | 1.79689300  | 0.21407400  |
| H | -2.22362000 | 1.75641100  | -1.24644100 |
| H | -3.65919900 | 0.74146600  | -1.11975400 |
| C | -2.80816800 | -1.14237300 | 0.56050100  |
| H | -3.22500900 | -1.79703900 | -0.21382100 |

|   |             |             |            |
|---|-------------|-------------|------------|
| H | -2.22321800 | -1.75654200 | 1.24652300 |
| H | -3.65894700 | -0.74174700 | 1.12014300 |

|   |             |             |             |
|---|-------------|-------------|-------------|
| H | -0.80732100 | -2.75565500 | 1.30414600  |
| H | 0.56234900  | -1.73846500 | 1.77404500  |
| H | -1.09390200 | -1.13361200 | 1.96083900  |
| C | -0.43001400 | 1.73080400  | 1.32181200  |
| H | 0.56236500  | 1.73844400  | 1.77403700  |
| H | -0.80725000 | 2.75569500  | 1.30411200  |
| H | -1.09391800 | 1.13367800  | 1.96083100  |
| H | -2.74115200 | -0.00000100 | 0.63245900  |
| C | 2.53354200  | 1.26628600  | -0.32623400 |
| H | 1.90043600  | 2.14691800  | -0.40473900 |
| H | 3.14329000  | 1.35310200  | 0.57948400  |
| H | 3.22913000  | 1.24615300  | -1.16984400 |
| C | 2.53354300  | -1.26629600 | -0.32622500 |
| H | 3.14333000  | -1.35307800 | 0.57947000  |
| H | 1.90043700  | -2.14693300 | -0.40467600 |
| H | 3.22909600  | -1.24619000 | -1.16986500 |

## NHO2b

0 1

|   |             |             |             |
|---|-------------|-------------|-------------|
| C | 0.19769000  | 0.05193500  | -0.18296700 |
| C | -1.98321300 | -0.74861500 | -0.41522200 |
| C | -1.86348000 | 0.69602100  | -0.89577700 |
| N | -0.66054800 | 1.20434000  | -0.22353200 |
| N | -0.58131100 | -1.14445400 | -0.24169600 |
| C | 1.53248700  | 0.11841600  | -0.17337800 |
| C | -0.95354900 | 1.70079900  | 1.12687100  |
| C | -0.40845300 | -2.10511300 | 0.84284400  |
| H | -1.63148900 | 2.55220000  | 1.05305100  |
| H | -1.41054800 | 0.94208200  | 1.77602300  |
| H | -0.02668100 | 2.03506900  | 1.59264600  |
| H | -0.99382300 | -2.99882300 | 0.62115600  |
| H | 0.63175600  | -2.40001400 | 0.94566500  |
| H | -0.75236700 | -1.69458400 | 1.80262900  |
| H | -2.52004300 | -0.80354100 | 0.54085200  |
| H | -1.70077700 | 0.72354500  | -1.97520900 |
| H | -2.49352200 | -1.39446000 | -1.13084500 |
| H | -2.73252900 | 1.30563600  | -0.65457900 |
| C | 2.25134600  | 1.43490600  | -0.07942900 |
| H | 3.00682900  | 1.51229100  | -0.86686600 |
| H | 1.56680500  | 2.27621700  | -0.17138500 |
| H | 2.78193100  | 1.52592200  | 0.87447900  |
| C | 2.40135400  | -1.10568000 | -0.26602500 |
| H | 2.74929400  | -1.45180700 | 0.71294900  |
| H | 1.88026800  | -1.93148200 | -0.75185000 |
| H | 3.29281000  | -0.87346300 | -0.85362700 |

## Protonated catalysts (anionic mechanism): NHO1a-H<sup>+</sup>

1 1

|   |             |             |             |
|---|-------------|-------------|-------------|
| C | -4.25663400 | -0.40401300 | -1.23414100 |
| C | -4.90103200 | 1.69088900  | -0.85218000 |
| C | -5.80042600 | 0.86451900  | -0.25566800 |
| N | -5.38007200 | -0.43229000 | -0.51605300 |
| N | -3.95560300 | 0.87553500  | -1.45928600 |
| C | -3.48277800 | -1.58324700 | -1.69196000 |
| C | -6.05219900 | -1.64224400 | -0.05394900 |
| C | -2.79508200 | 1.34728900  | -2.20788600 |
| C | -4.83338000 | 3.17441500  | -0.91873900 |
| C | -7.02324300 | 1.15904300  | 0.53677300  |
| H | -4.96557300 | 3.53225700  | -1.94139500 |
| H | -5.62268900 | 3.60508900  | -0.30707100 |
| H | -3.87576900 | 3.54236100  | -0.54728100 |
| H | -7.10998500 | 2.23167600  | 0.69383200  |
| H | -7.92275100 | 0.81902400  | 0.02019100  |
| H | -6.98400800 | 0.67373000  | 1.51320400  |
| H | -7.11387600 | -1.43426700 | 0.04201600  |
| H | -5.91536400 | -2.43294500 | -0.78613000 |
| H | -5.65004400 | -1.95019000 | 0.91012000  |
| H | -2.42854100 | -1.33071600 | -1.78284500 |
| H | -3.57855900 | -2.39464500 | -0.97334300 |
| H | -2.57854800 | 0.65208900  | -3.01387500 |
| H | -3.02909200 | 2.31737200  | -2.63644100 |
| H | -1.93404600 | 1.43673300  | -1.54721300 |
| H | -3.84562800 | -1.93005200 | -2.66186700 |

## NHO 2c

0 1

|   |             |             |             |
|---|-------------|-------------|-------------|
| C | -1.61138300 | -1.22880100 | -0.75078000 |
| C | -2.45518900 | -0.00000100 | -0.42327300 |
| C | -1.61138200 | 1.22879900  | -0.75077900 |
| H | -3.37420000 | 0.00000000  | -1.01350600 |
| H | -1.41046700 | -1.23898200 | -1.82777200 |
| H | -2.13472200 | -2.15566200 | -0.50848600 |
| H | -1.41047300 | 1.23898500  | -1.82777100 |
| H | -2.13471700 | 2.15566100  | -0.50847800 |
| C | 0.39505200  | -0.00000400 | -0.16104500 |
| C | 1.72739100  | -0.00000500 | -0.29208400 |
| N | -0.32653200 | 1.23809000  | -0.05097300 |
| N | -0.32653500 | -1.23809800 | -0.05096900 |
| C | -0.43003400 | -1.73078200 | 1.32182600  |

## NHO 1b-H<sup>+</sup>

1 1

|   |             |             |             |
|---|-------------|-------------|-------------|
| C | 0.01386700  | 0.58958500  | 0.00332100  |
| C | -0.81810000 | -1.54839500 | 0.05405900  |
| C | 0.71007700  | -1.59938900 | -0.05952400 |
| N | 1.08012000  | -0.18701200 | 0.08529200  |
| N | -1.10141500 | -0.11203800 | -0.07348700 |
| C | 0.10453700  | 2.07120900  | -0.00396200 |
| C | 2.46659500  | 0.22907900  | -0.00291000 |
| C | -2.47439300 | 0.35020400  | 0.00169000  |
| H | 2.84415300  | 0.07749100  | -1.01591300 |
| H | 2.56180400  | 1.27654000  | 0.26879200  |
| H | 3.05486300  | -0.36819400 | 0.69195100  |
| H | -0.86908800 | 2.53581100  | -0.10747700 |
| H | 0.55994300  | 2.40772500  | 0.92812600  |
| H | -2.53360200 | 1.41637200  | -0.18718200 |
| H | -3.05840000 | -0.17302900 | -0.75407300 |
| H | -2.88517300 | 0.13166900  | 0.98869200  |
| H | 0.73971700  | 2.38942200  | -0.83071700 |
| H | -1.32463900 | -2.10080300 | -0.73472400 |
| H | 1.04559300  | -1.96167600 | -1.03304300 |
| H | -1.17774000 | -1.89769300 | 1.02357500  |
| H | 1.17613700  | -2.19404300 | 0.72330500  |

### NHO 1c-H<sup>+</sup>

1 1

|   |             |             |             |
|---|-------------|-------------|-------------|
| C | 1.23631600  | 1.40118600  | 0.18975900  |
| C | 0.00181300  | 2.04983900  | -0.39520900 |
| C | -1.23338500 | 1.40335400  | 0.19072200  |
| H | 0.00293100  | 3.11510100  | -0.17101400 |
| H | 1.35023200  | 1.64116500  | 1.25003200  |
| H | 2.12885300  | 1.73739400  | -0.33336400 |
| H | -1.34544300 | 1.64265800  | 1.25135700  |
| H | -2.12590900 | 1.74181300  | -0.33096800 |
| C | -0.00052800 | -0.69677500 | -0.00254600 |
| C | -0.00290100 | -2.19037500 | -0.11581900 |
| H | 0.87994700  | -2.61909900 | 0.34544000  |
| H | -0.87851200 | -2.61630100 | 0.36197500  |
| N | -1.16003700 | -0.05647200 | 0.03933800  |
| N | 1.16015200  | -0.05876100 | 0.04000400  |
| C | 2.43409100  | -0.78532100 | 0.03076700  |
| H | 2.59924100  | -1.29823700 | 0.97838900  |
| H | 2.46871400  | -1.49955400 | -0.78863700 |
| H | 3.22822600  | -0.05927400 | -0.11280800 |
| C | -2.43497300 | -0.78104000 | 0.03062500  |
| H | -2.46860900 | -1.49962700 | -0.78497600 |
| H | -2.60317200 | -1.28886700 | 0.98052600  |
| H | -3.22772000 | -0.05465200 | -0.11893900 |

|   |             |             |             |
|---|-------------|-------------|-------------|
| H | 0.00123000  | 1.92860600  | -1.47985900 |
| H | -0.01341400 | -2.46970300 | -1.17234400 |

### NHO 1d-H<sup>+</sup>

1 1

|   |             |             |             |
|---|-------------|-------------|-------------|
| C | 0.00319000  | 0.53781700  | 0.00587500  |
| C | -0.69042800 | -1.56177400 | -0.00236500 |
| C | 0.66239700  | -1.57337400 | -0.00505100 |
| N | 1.07372800  | -0.26005700 | -0.00154500 |
| N | -1.08114100 | -0.24140900 | 0.00357600  |
| C | 0.02814100  | 2.01801500  | -0.00612800 |
| C | 2.45937900  | 0.20205800  | 0.00605400  |
| C | -2.46333600 | 0.23361200  | 0.00318900  |
| H | 3.10115100  | -0.65374800 | -0.17951100 |
| H | 2.60166200  | 0.93928200  | -0.78065600 |
| H | 2.69801700  | 0.63662600  | 0.97486300  |
| H | -0.91341300 | 2.41620400  | 0.36516500  |
| H | 0.83624400  | 2.38457400  | 0.62527500  |
| H | -2.63197900 | 0.87549900  | -0.85835800 |
| H | -3.11412500 | -0.63322200 | -0.05710100 |
| H | -2.66683900 | 0.77614000  | 0.92377900  |
| H | 0.18688800  | 2.38513400  | -1.02226900 |
| H | -1.40506900 | -2.36536600 | -0.00494900 |
| H | 1.36329100  | -2.38899000 | -0.00990100 |

### NHO 1e-H<sup>+</sup>

1 1

|   |             |             |             |
|---|-------------|-------------|-------------|
| C | 0.69813100  | 0.50277600  | -0.17582800 |
| C | -0.08198500 | -1.53701200 | 0.16030900  |
| C | 1.26607400  | -1.58841100 | 0.26004600  |
| N | 1.73198700  | -0.31268600 | 0.04800800  |
| N | -0.41936400 | -0.22911000 | -0.11711200 |
| C | 0.81899800  | 1.95980800  | -0.41814400 |
| C | 3.13216200  | 0.10151000  | 0.05580300  |
| C | -1.79588800 | 0.30881800  | -0.24575300 |
| H | 3.42344200  | 0.43690300  | -0.93752300 |
| H | 3.27187500  | 0.90343600  | 0.77749100  |
| H | 3.73505200  | -0.75468700 | 0.34213800  |
| H | -0.11428700 | 2.37456600  | -0.78859500 |
| H | -1.74703200 | 1.04802300  | -1.04525200 |
| H | 1.08495200  | 2.47283000  | 0.50839500  |
| H | 1.60157400  | 2.15035200  | -1.15273800 |
| H | -0.81629500 | -2.31498900 | 0.25793700  |
| H | 1.92989900  | -2.41108800 | 0.45800900  |
| C | -2.76117900 | -0.78729200 | -0.66219700 |
| H | -2.91612000 | -1.51051100 | 0.13982200  |
| H | -3.72365500 | -0.32721100 | -0.88188400 |



|   |             |             |             |
|---|-------------|-------------|-------------|
| H | -2.41633600 | -1.30719400 | -1.55610400 |
| C | -2.20336800 | 0.97553600  | 1.06059300  |
| H | -3.19980400 | 1.40354900  | 0.95196500  |
| H | -2.22605400 | 0.23998000  | 1.86662600  |
| H | -1.51323400 | 1.77421300  | 1.33446500  |

|   |             |             |             |
|---|-------------|-------------|-------------|
| C | -1.33963600 | -0.76388800 | -0.06164200 |
| C | -0.66920900 | 2.28438400  | 0.05999100  |
| C | 1.27318900  | -2.26999500 | -0.10480900 |
| H | -0.75532500 | 2.66311000  | -0.96036500 |
| H | -1.64578000 | 1.98989800  | 0.42554200  |
| H | -0.28307000 | 3.07341500  | 0.70308200  |
| H | -1.15962700 | -1.82308000 | -0.23868700 |
| H | 0.62489300  | -2.73530300 | -0.84285800 |
| H | 2.30337300  | -2.50607800 | -0.36008900 |
| H | 1.05403000  | -2.66361300 | 0.88864100  |
| H | 3.06915900  | -0.15530700 | -0.66525100 |
| H | 1.88022100  | 1.89549700  | -1.00588100 |
| H | 2.71313300  | -0.15731900 | 1.07691800  |
| H | 2.03381200  | 2.11812300  | 0.75129200  |
| C | -2.20884700 | -0.25874500 | -1.21959500 |
| H | -3.08000200 | -0.90874900 | -1.30072800 |
| H | -2.56746700 | 0.75700100  | -1.06458700 |
| H | -1.66749300 | -0.29661900 | -2.16549300 |
| C | -2.02366100 | -0.65020700 | 1.30736700  |
| H | -2.26885500 | 0.37948900  | 1.56396900  |
| H | -2.95180600 | -1.22077400 | 1.28016500  |
| H | -1.39235300 | -1.05991400 | 2.09641700  |

### NHO2a-H<sup>+</sup>

1 1

|   |             |             |             |
|---|-------------|-------------|-------------|
| C | 0.54473300  | -0.19338300 | -0.03487000 |
| C | -1.66442100 | -0.50367000 | -0.01757600 |
| C | -1.43167400 | 0.83387700  | 0.02632800  |
| N | -0.05368300 | 1.00027700  | 0.02261600  |
| N | -0.42091400 | -1.11849000 | -0.05124300 |
| C | 2.01125600  | -0.49894700 | -0.07548200 |
| C | 0.59723800  | 2.30676100  | 0.05284400  |
| C | -0.19921200 | -2.56255300 | -0.09588000 |
| C | -2.94245200 | -1.26434100 | -0.03058700 |
| C | -2.37024600 | 1.98627800  | 0.07364700  |
| H | -3.03217100 | -1.90421000 | 0.84884000  |
| H | -3.78034300 | -0.57136300 | -0.02835500 |
| H | -3.02184100 | -1.88929400 | -0.92137900 |
| H | -3.39255300 | 1.63112200  | -0.03051700 |
| H | -2.29357700 | 2.52254900  | 1.02130500  |
| H | -2.17061700 | 2.69019600  | -0.73566900 |
| H | -0.01001400 | 2.97992100  | 0.65148800  |
| H | 1.57455500  | 2.21898600  | 0.51299700  |
| H | 0.69432000  | 2.70019900  | -0.95785600 |
| H | 2.07267400  | -1.56176900 | -0.31332700 |
| H | 0.45183700  | -2.86334400 | 0.72156900  |
| H | -1.15708300 | -3.05919900 | 0.01697500  |
| H | 0.23983000  | -2.84431700 | -1.05079800 |
| C | 2.74653700  | 0.24532400  | -1.19651500 |
| H | 2.87106300  | 1.30522100  | -0.98016600 |
| H | 3.74158300  | -0.18624600 | -1.30516200 |
| H | 2.22467100  | 0.14351600  | -2.14853200 |
| C | 2.67031300  | -0.30149800 | 1.29618400  |
| H | 2.15808300  | -0.87938100 | 2.06603600  |
| H | 3.70600000  | -0.63777400 | 1.24401300  |
| H | 2.67332800  | 0.74559600  | 1.60036900  |

### NHO 2c-H<sup>+</sup>

1 1

|   |             |             |             |
|---|-------------|-------------|-------------|
| C | 1.26369500  | 1.45414200  | 0.10581100  |
| C | -0.02733600 | 2.06358100  | -0.38399800 |
| C | -1.17669100 | 1.38543000  | 0.32362700  |
| H | -0.03790700 | 3.13189200  | -0.17568500 |
| H | 1.45661000  | 1.71098200  | 1.15073700  |
| H | 2.11086800  | 1.79428600  | -0.48952900 |
| H | -1.18812900 | 1.62522700  | 1.39007200  |
| H | -2.13093100 | 1.68965400  | -0.10432100 |
| C | 0.07967100  | -0.68672300 | -0.04822200 |
| C | 0.04351200  | -2.17740000 | -0.34589600 |
| H | -0.97169500 | -2.36141700 | -0.68779600 |
| N | -1.07934100 | -0.07217100 | 0.16408700  |
| N | 1.21921800  | -0.01012700 | -0.01724100 |
| C | 2.54703600  | -0.62352200 | -0.03902700 |
| H | 3.18707200  | -0.02505000 | 0.60748000  |
| H | 2.52535900  | -1.63137000 | 0.35287400  |
| H | 2.95918600  | -0.62054500 | -1.04845900 |
| C | -2.36193500 | -0.77544700 | 0.27326800  |
| H | -2.81396000 | -0.92147500 | -0.70875400 |
| H | -2.25618100 | -1.72816500 | 0.78175000  |
| H | -3.01862600 | -0.15086000 | 0.87426700  |
| H | -0.12110000 | 1.92331600  | -1.46263500 |
| C | 0.93568600  | -2.62276300 | -1.51429700 |

### NHO 2b-H<sup>+</sup>

1 1

|   |            |             |             |
|---|------------|-------------|-------------|
| C | 0.01631800 | -0.12238200 | -0.03531900 |
| C | 2.30546200 | 0.04113500  | 0.08349200  |
| C | 1.69845900 | 1.43977700  | -0.03003500 |
| N | 0.26102100 | 1.17012400  | 0.11262600  |
| N | 1.13622200 | -0.82016000 | -0.13816800 |

|   |             |             |             |
|---|-------------|-------------|-------------|
| H | 1.95108000  | -2.86598600 | -1.21128200 |
| H | 0.50043200  | -3.52644900 | -1.94057900 |
| H | 0.97635400  | -1.86789500 | -2.30091400 |
| C | 0.25368500  | -3.01737200 | 0.92066800  |
| H | 1.26412000  | -2.91956600 | 1.31650500  |
| H | -0.44264800 | -2.73647100 | 1.71176000  |
| H | 0.08907900  | -4.06703800 | 0.67668400  |

|     |             |             |             |
|-----|-------------|-------------|-------------|
| O 1 |             |             |             |
| C   | -1.00215600 | 0.00015000  | -0.35151800 |
| C   | 1.21401300  | -0.66861200 | -0.20053000 |
| C   | 1.21418500  | 0.66837200  | -0.20051500 |
| N   | -0.09541500 | 1.12181200  | -0.52295800 |
| N   | -0.09565300 | -1.12171700 | -0.52310000 |
| C   | -0.55413700 | 2.43729600  | -0.12238200 |
| C   | -0.55469800 | -2.43710900 | -0.12256900 |
| H   | 0.15457400  | 3.18598700  | -0.47515800 |
| H   | -1.51278300 | 2.64261200  | -0.59777200 |
| H   | -0.67786800 | 2.55726900  | 0.96002500  |
| H   | -1.51345200 | -2.64209800 | -0.59787100 |
| C   | -2.14993900 | 0.00031600  | -1.34499800 |
| H   | -2.77518200 | -0.87964700 | -1.19630900 |
| H   | -2.77472100 | 0.88065600  | -1.19662200 |
| H   | -1.75467200 | 0.00002400  | -2.35822800 |
| O   | -1.65674000 | 0.00006700  | 0.92844700  |
| C   | -0.81642700 | -0.00001700 | 2.06843600  |
| H   | -0.17458400 | -0.88290200 | 2.10126100  |
| H   | -0.17364500 | 0.88216700  | 2.10083600  |
| C   | 2.32933400  | 1.64066600  | -0.04757700 |
| H   | 2.45044500  | 2.24709200  | -0.95040200 |
| H   | 3.26664400  | 1.11957800  | 0.13934500  |
| H   | 2.15229200  | 2.32763200  | 0.78475700  |
| C   | 2.32889500  | -1.64119700 | -0.04751300 |
| H   | 3.26640500  | -1.12036100 | 0.13911000  |
| H   | 2.44967500  | -2.24789000 | -0.95020100 |
| H   | 2.15177400  | -2.32789800 | 0.78502400  |
| H   | 0.15374200  | -3.18598000 | -0.47551100 |
| H   | -0.67830700 | -2.55713800 | 0.95984300  |
| H   | -1.47335600 | 0.00051300  | 2.93770300  |

**NHO-Alcohol adducts (anionic mechanism):**

**NHO 1a-EtOH adduct**

|     |             |             |             |
|-----|-------------|-------------|-------------|
| O 1 |             |             |             |
| C   | -0.49598300 | -0.00005000 | 0.93694600  |
| C   | 1.42842400  | -0.66844800 | -0.16888600 |
| C   | 1.42845500  | 0.66854200  | -0.16873600 |
| N   | 0.39567200  | 1.12285600  | 0.69956200  |
| N   | 0.39583300  | -1.12289000 | 0.69962100  |
| C   | -0.19849900 | 2.43468700  | 0.53150800  |
| C   | -0.19826500 | -2.43474900 | 0.53138100  |
| H   | -0.79873800 | 2.53890900  | -0.37972500 |
| H   | -0.83858300 | 2.65202700  | 1.38622100  |
| H   | 0.59174900  | 3.18458600  | 0.51322700  |
| H   | -0.79824000 | -2.53896900 | -0.38001900 |
| H   | 0.59203300  | -3.18460400 | 0.51333000  |
| H   | -0.83856500 | -2.65210500 | 1.38592600  |
| C   | -1.09282500 | -0.00011100 | 2.33271300  |
| H   | -1.71889600 | -0.88081600 | 2.47378300  |
| O   | -1.64012700 | -0.00017600 | 0.07104300  |
| C   | -1.40110800 | 0.00006000  | -1.33051100 |
| H   | -0.81577100 | -0.87732100 | -1.61987100 |
| H   | -0.81594900 | 0.87764700  | -1.61960400 |
| C   | -2.74750400 | 0.00004900  | -2.02196600 |
| H   | -3.32014600 | 0.88553400  | -1.74218800 |
| H   | -2.61540600 | 0.00027200  | -3.10463300 |
| H   | -3.31996900 | -0.88565600 | -1.74252800 |
| H   | -0.29255300 | 0.00023100  | 3.06930200  |
| H   | -1.71955400 | 0.88014700  | 2.47364000  |
| C   | 2.35979700  | -1.63945600 | -0.80281100 |
| H   | 3.12361300  | -1.11617000 | -1.37544100 |
| H   | 2.86075200  | -2.25570300 | -0.04999000 |
| H   | 1.83333600  | -2.31718300 | -1.48088700 |
| C   | 2.35978200  | 1.63965600  | -0.80258900 |
| H   | 1.83330700  | 2.31744300  | -1.48058500 |
| H   | 2.86072300  | 2.25581600  | -0.04968500 |
| H   | 3.12369200  | 1.11647200  | -1.37519800 |

**NHO 1b-EtOH adduct**

|     |             |             |             |
|-----|-------------|-------------|-------------|
| O 1 |             |             |             |
| O   | 1.05690800  | -0.61188300 | 0.54778900  |
| C   | 1.68428000  | -0.69612300 | -0.72531100 |
| H   | 1.41904400  | 0.16867400  | -1.33804000 |
| C   | -0.26796400 | -0.09990200 | 0.56785000  |
| C   | -1.92124500 | 0.31348100  | -1.06491800 |
| C   | -1.00363800 | 1.52154600  | -1.02262400 |
| N   | -0.35738600 | 1.33050600  | 0.26514600  |
| N   | -1.07586100 | -0.71106200 | -0.47715300 |
| C   | -0.74188300 | -0.34832100 | 1.99469200  |
| C   | 0.80519500  | 2.14405900  | 0.54118900  |
| C   | -1.73526700 | -1.95791500 | -0.15579400 |
| H   | 1.62419500  | 1.99553900  | -0.17623100 |
| H   | 1.18539600  | 1.92315700  | 1.53892900  |

**NHO 1a-MeOH adduct**

|   |             |             |             |
|---|-------------|-------------|-------------|
| H | 0.51616800  | 3.19641100  | 0.51363700  |
| H | -0.62059400 | -1.39395300 | 2.27699800  |
| H | -1.79037900 | -0.06348300 | 2.08528100  |
| H | -1.00868000 | -2.66719400 | 0.24332800  |
| H | -2.15375800 | -2.38222500 | -1.06977300 |
| H | -2.54999100 | -1.84085100 | 0.57292000  |
| H | -0.15352300 | 0.26687300  | 2.67644900  |
| H | -2.22140100 | 0.03244100  | -2.07554700 |
| H | -0.29657000 | 1.50446900  | -1.86529000 |
| H | -2.82734200 | 0.49822800  | -0.46643500 |
| H | -1.54617400 | 2.46834700  | -1.04670500 |
| H | 1.33340900  | -1.58796700 | -1.25127600 |
| C | 3.18020100  | -0.75272300 | -0.49948700 |
| H | 3.44037500  | -1.61125500 | 0.12141400  |
| H | 3.70273300  | -0.84602700 | -1.45254500 |
| H | 3.52648200  | 0.15316300  | 0.00105600  |

### NHO 1b-MeOH adduct

|     |             |             |             |
|-----|-------------|-------------|-------------|
| O 1 |             |             |             |
| O   | 0.42718200  | -1.56882400 | -0.16269700 |
| C   | 0.60035600  | -1.54892900 | -1.56843700 |
| H   | 1.12842600  | -0.65321100 | -1.90146200 |
| H   | 1.19720400  | -2.42563900 | -1.81782500 |
| C   | -0.03290200 | -0.35593100 | 0.42422600  |
| C   | -0.94180600 | 1.64717400  | -0.43620500 |
| C   | 0.57035600  | 1.75536300  | -0.50804400 |
| N   | 0.96238400  | 0.71591500  | 0.42894200  |
| N   | -1.12387400 | 0.20851800  | -0.35264300 |
| C   | -0.37687700 | -0.74350000 | 1.85671000  |
| C   | 2.35633100  | 0.33375200  | 0.44507200  |
| C   | -2.46370900 | -0.23722200 | -0.04001700 |
| H   | 2.71474300  | -0.06403700 | -0.51390100 |
| H   | 2.52326500  | -0.42568800 | 1.20928500  |
| H   | 2.95960200  | 1.20741800  | 0.69842200  |
| H   | -1.06440800 | -1.58852100 | 1.88380600  |
| H   | -0.82447500 | 0.11005600  | 2.36619500  |
| H   | -2.50109200 | -1.32743700 | -0.04462100 |
| H   | -3.14562900 | 0.12567400  | -0.81075600 |
| H   | -2.82445500 | 0.12387700  | 0.93367100  |
| H   | 0.53699100  | -1.02260800 | 2.38224000  |
| H   | -1.44802400 | 2.05025600  | -1.31473100 |
| H   | 0.92749400  | 1.56956500  | -1.53167100 |
| H   | -1.32142400 | 2.16486100  | 0.45871100  |
| H   | 0.94300400  | 2.72834600  | -0.18299600 |
| H   | -0.35874300 | -1.59760100 | -2.08671100 |

### NHO 1c-EtOH adduct

|     |             |             |             |
|-----|-------------|-------------|-------------|
| O 1 |             |             |             |
| C   | -1.83194200 | 1.33473600  | -0.38292900 |
| C   | -2.39654800 | 0.13942500  | -1.12488700 |
| C   | -1.98155000 | -1.13064100 | -0.40888800 |
| H   | -3.48505600 | 0.20610800  | -1.17299100 |
| H   | -2.34054800 | 1.44755900  | 0.59000400  |
| H   | -2.01381500 | 2.25616000  | -0.94062000 |
| H   | -2.49963500 | -1.20056000 | 0.56282700  |
| H   | -2.27307000 | -2.01149200 | -0.98524000 |
| C   | 0.02621100  | -0.02580700 | 0.48147000  |
| N   | -0.53314400 | -1.17381700 | -0.24395800 |
| N   | -0.38945900 | 1.19822200  | -0.21842200 |
| C   | 0.17370900  | 2.40968900  | 0.36144300  |
| H   | 1.23786300  | 2.27448800  | 0.54772600  |
| H   | 0.04670000  | 3.22617800  | -0.35116100 |
| H   | -0.31524700 | 2.70308800  | 1.30160000  |
| C   | -0.12426800 | -2.45632300 | 0.31221800  |
| H   | 0.94376900  | -2.44951100 | 0.52396800  |
| H   | -0.66290900 | -2.71480500 | 1.23509000  |
| H   | -0.32803300 | -3.23550100 | -0.42422400 |
| H   | -2.00704100 | 0.12657700  | -2.14521200 |
| O   | 1.43308300  | -0.11061300 | 0.45013300  |
| C   | 2.04121300  | -0.19590800 | -0.83481900 |
| H   | 1.84925300  | -1.18053000 | -1.27084400 |
| H   | 1.60996200  | 0.55657300  | -1.49793700 |
| C   | -0.31531700 | -0.01850000 | 1.97474100  |
| H   | 0.17845000  | 0.81921500  | 2.46518600  |
| H   | 0.03809100  | -0.93632700 | 2.44234900  |
| H   | -1.39010100 | 0.06642700  | 2.13548300  |
| C   | 3.52595200  | 0.02808100  | -0.64334400 |
| H   | 4.04391500  | -0.04970500 | -1.60017300 |
| H   | 3.71368600  | 1.01883600  | -0.22632800 |
| H   | 3.94257500  | -0.71721800 | 0.03606100  |

### NHO 1c-MeOH adduct

|     |             |             |             |
|-----|-------------|-------------|-------------|
| O 1 |             |             |             |
| C   | 2.02518100  | -0.31253200 | -0.14488800 |
| C   | 1.97948100  | 1.07758200  | -0.74787600 |
| C   | 0.84550200  | 1.85607000  | -0.11130100 |
| H   | 2.92871200  | 1.59067300  | -0.58336200 |
| H   | 2.35288700  | -0.25524300 | 0.90765200  |
| H   | 2.75515100  | -0.93502600 | -0.66724600 |
| H   | 1.08295300  | 2.06988600  | 0.94509000  |
| H   | 0.71318000  | 2.82123700  | -0.60538700 |
| C   | -0.38523800 | -0.22408100 | 0.34498000  |
| N   | -0.40877100 | 1.12313700  | -0.23715700 |
| N   | 0.72700300  | -0.96462500 | -0.26547200 |
| C   | 0.80926800  | -2.34776500 | 0.18219900  |

|   |             |             |             |
|---|-------------|-------------|-------------|
| H | -0.17666400 | -2.80833300 | 0.15496800  |
| H | 1.46602100  | -2.89404700 | -0.49676900 |
| H | 1.21808300  | -2.44686200 | 1.19813200  |
| C | -1.52117300 | 1.93372300  | 0.23921500  |
| H | -2.43868400 | 1.34758900  | 0.23997000  |
| H | -1.35958100 | 2.33231900  | 1.25091800  |
| H | -1.64889400 | 2.77979500  | -0.43811000 |
| H | 1.81030200  | 1.00207600  | -1.82430600 |
| O | -1.59329800 | -0.87744100 | 0.01874300  |
| C | -1.91498200 | -0.93548400 | -1.36231500 |
| H | -2.71285600 | -1.67060200 | -1.45688200 |
| H | -2.26691700 | 0.03209000  | -1.72642600 |
| H | -1.05381000 | -1.24779500 | -1.95363100 |
| C | -0.35364200 | -0.23077300 | 1.87577500  |
| H | -0.40264300 | -1.25351200 | 2.24639700  |
| H | -1.21232000 | 0.31070300  | 2.27002500  |
| H | 0.55746700  | 0.23455900  | 2.25270000  |

## NHO 1d-MeOH adduct

|     |             |             |             |
|-----|-------------|-------------|-------------|
| O 1 |             |             |             |
| C   | 0.00000400  | -0.51339600 | -0.32805300 |
| C   | -0.66711200 | 1.70262700  | -0.28783900 |
| C   | 0.66716400  | 1.70261600  | -0.28800600 |
| N   | 1.12228300  | 0.39050100  | -0.52951200 |
| N   | -1.12229000 | 0.39050100  | -0.52935100 |
| C   | 2.44833700  | -0.03337300 | -0.13160900 |
| C   | -2.44837200 | -0.03332700 | -0.13155300 |
| H   | 3.16545500  | 0.71897900  | -0.45981800 |
| H   | 2.56026000  | -0.17596600 | 0.94866100  |
| H   | 2.69761800  | -0.97076400 | -0.62868800 |
| H   | -2.56000200 | -0.17738500 | 0.94853400  |
| H   | -3.16527800 | 0.71978800  | -0.45849600 |
| H   | -2.69830300 | -0.96990000 | -0.62988000 |
| C   | -0.00012000 | -1.69147500 | -1.28485200 |
| H   | -0.88093300 | -2.31011300 | -1.11430800 |
| O   | 0.00015100  | -1.12372200 | 0.96968900  |
| C   | 0.00001500  | -0.24303400 | 2.07952600  |
| H   | -0.88271000 | 0.39951100  | 2.08783700  |
| H   | 0.88283700  | 0.39939700  | 2.08812900  |
| H   | -0.00056900 | -1.32916400 | -2.31030100 |
| H   | 0.88108600  | -2.30975200 | -1.11500500 |
| H   | -1.35833600 | 2.52639400  | -0.21957900 |
| H   | 1.35837300  | 2.52638700  | -0.21959600 |
| H   | -0.00015500 | -0.86847500 | 2.97136100  |

## NHO 1d-EtOH adduct

|     |             |             |             |
|-----|-------------|-------------|-------------|
| O 1 |             |             |             |
| C   | 0.45101300  | 0.00056100  | 0.62058000  |
| C   | 1.26486400  | -0.66479000 | -1.44026200 |
| C   | 1.26224800  | 0.66939400  | -1.44018700 |
| N   | 0.98541300  | 1.12486800  | -0.13491900 |
| N   | 0.98994200  | -1.12146300 | -0.13497300 |
| C   | 0.44646900  | 2.44783800  | 0.10146200  |
| C   | 0.45582400  | -2.44650500 | 0.10100500  |
| H   | -0.61240300 | 2.54602100  | -0.16208700 |
| H   | 0.56364800  | 2.70921700  | 1.15316100  |
| H   | 1.01947300  | 3.16483400  | -0.48623900 |
| H   | -0.60266100 | -2.54842500 | -0.16263800 |
| H   | 1.03151300  | -3.16114200 | -0.48693800 |
| H   | 0.57386100  | -2.70775000 | 1.15264900  |
| C   | 0.88139400  | 0.00133800  | 2.07597500  |
| H   | 0.48925700  | -0.88083100 | 2.58160900  |
| O   | -0.97988100 | -0.00225500 | 0.68229200  |
| C   | -1.68297700 | -0.00300500 | -0.55412600 |
| H   | -1.41094000 | -0.88041600 | -1.14724800 |
| H   | -1.41279500 | 0.87499900  | -1.14719200 |
| C   | -3.16305900 | -0.00457500 | -0.23837100 |
| H   | -3.43057200 | 0.88091600  | 0.33992500  |
| H   | -3.74528500 | -0.00522500 | -1.16062400 |
| H   | -3.42879900 | -0.89050600 | 0.34005800  |
| H   | 1.96738700  | 0.00400300  | 2.13510500  |
| H   | 0.48480600  | 0.88127600  | 2.58203400  |
| H   | 1.51790200  | -1.35437800 | -2.22863100 |
| H   | 1.51251700  | 1.36007600  | -2.22849200 |

## NHO 1e-EtOH adduct

|     |             |             |             |
|-----|-------------|-------------|-------------|
| O 1 |             |             |             |
| C   | -0.36340400 | -0.55246900 | 0.54771000  |
| C   | 0.55030300  | -0.79234400 | -1.57146800 |
| C   | -0.68082900 | -1.30395900 | -1.62621900 |
| N   | -1.21110100 | -1.36336900 | -0.31915700 |
| N   | 0.85681700  | -0.47622200 | -0.23911600 |
| C   | -2.64437200 | -1.32739200 | -0.10904000 |
| C   | 1.96512900  | 0.37220100  | 0.19690500  |
| H   | -3.10696100 | -2.08060200 | -0.74701000 |
| H   | -2.87064900 | -1.58018900 | 0.92684500  |
| H   | -3.09599800 | -0.35410700 | -0.33203800 |
| H   | 1.54468000  | 1.10687900  | 0.89280400  |
| C   | -0.17145200 | -1.16691700 | 1.92412000  |
| H   | 0.45647300  | -0.51889700 | 2.53648000  |
| H   | -1.13684600 | -1.26901600 | 2.42049800  |
| H   | 0.29356100  | -2.14597100 | 1.82833000  |
| O   | -0.93379500 | 0.73094800  | 0.83522200  |
| C   | -1.12189900 | 1.60406200  | -0.26995900 |
| H   | -0.15045800 | 1.90501800  | -0.67421800 |

|   |             |             |             |
|---|-------------|-------------|-------------|
| H | -1.66412300 | 1.09526000  | -1.07091400 |
| H | 1.27443200  | -0.68802600 | -2.36062800 |
| H | -1.21763000 | -1.71819100 | -2.46335000 |
| C | -1.89423500 | 2.80939400  | 0.22101600  |
| H | -1.35201000 | 3.30943200  | 1.02479100  |
| H | -2.04192400 | 3.52144400  | -0.59186100 |
| H | -2.87211700 | 2.50683300  | 0.59884100  |
| C | 2.60607300  | 1.12791800  | -0.96359800 |
| H | 3.33981600  | 1.83315600  | -0.57240300 |
| H | 3.13104000  | 0.44122200  | -1.63160400 |
| H | 1.87177100  | 1.68288400  | -1.54824300 |
| C | 3.02959700  | -0.44696700 | 0.92936300  |
| H | 3.82707700  | 0.20301000  | 1.29580700  |
| H | 2.60514000  | -0.98399100 | 1.77694500  |
| H | 3.46561300  | -1.17775400 | 0.24408600  |

### NHO 2a-EtOH adduct

|     |             |             |             |
|-----|-------------|-------------|-------------|
| O 1 |             |             |             |
| C   | -0.56548800 | -0.18048800 | -0.21102700 |
| C   | 1.75341500  | -0.30714600 | -0.43111900 |
| C   | 1.48071600  | -0.50280600 | 0.86307100  |
| N   | 0.07172400  | -0.60306100 | 1.03083200  |
| N   | 0.53623500  | -0.28971700 | -1.15491300 |
| C   | -0.53947500 | -0.24343100 | 2.30387100  |
| C   | 0.41409400  | 0.38538100  | -2.42945200 |
| C   | 3.05587000  | -0.25164800 | -1.14869700 |
| C   | 2.39539900  | -0.75466200 | 2.01079500  |
| H   | 3.19249000  | 0.70443100  | -1.66189500 |
| H   | 3.88091600  | -0.37604800 | -0.44961900 |
| H   | 3.12477700  | -1.03996800 | -1.90459400 |
| H   | 3.42625600  | -0.81881400 | 1.66638900  |
| H   | 2.34633400  | 0.03561000  | 2.76412400  |
| H   | 2.14288100  | -1.69530900 | 2.50924400  |
| H   | 0.14637400  | 0.34341100  | 2.91742600  |
| H   | -1.42653000 | 0.36475800  | 2.13141300  |
| H   | -0.83403400 | -1.12878100 | 2.87203400  |
| H   | 0.37844500  | 1.47882400  | -2.35209700 |
| H   | 1.25861300  | 0.10941800  | -3.05983100 |
| H   | -0.49437400 | 0.05168700  | -2.93205600 |
| C   | -1.76991400 | -1.04451300 | -0.63678000 |
| H   | -2.13559200 | -0.59869500 | -1.56722300 |
| O   | -1.09202800 | 1.14841400  | -0.14660700 |
| C   | -0.18647700 | 2.16663700  | 0.25775400  |
| H   | 0.71464400  | 2.14473900  | -0.36093100 |
| H   | 0.12949000  | 2.00219900  | 1.29284100  |
| C   | -2.91739300 | -1.01383100 | 0.37198200  |
| H   | -3.20476600 | 0.00508500  | 0.63083900  |
| H   | -3.78777000 | -1.51740200 | -0.05244100 |
| H   | -2.64488000 | -1.54504500 | 1.28640800  |
| C   | -1.34928800 | -2.48330400 | -0.91145300 |
| H   | -2.21824100 | -3.07740700 | -1.20124100 |
| H   | -0.60655600 | -2.53930900 | -1.70673400 |
| H   | -0.91770200 | -2.92488900 | -0.00986000 |
| C   | -0.89833300 | 3.49554100  | 0.12195400  |
| H   | -1.79556400 | 3.51333700  | 0.74234600  |
| H   | -0.24329400 | 4.30887200  | 0.43682900  |
| H   | -1.19015300 | 3.66704900  | -0.91534500 |

### NHO 1e-MeOH adduct

|     |             |             |             |
|-----|-------------|-------------|-------------|
| O 1 |             |             |             |
| C   | -0.58161000 | 0.59295400  | -0.08416400 |
| C   | 0.21166600  | -1.19971600 | 1.15531600  |
| C   | -1.10939100 | -1.16027100 | 1.34089300  |
| N   | -1.61495800 | 0.02778800  | 0.77207500  |
| N   | 0.60601300  | -0.05893700 | 0.43880700  |
| C   | -2.99666500 | 0.11340600  | 0.34608500  |
| C   | 1.90170800  | 0.12910900  | -0.21277200 |
| H   | -3.63406900 | -0.21144700 | 1.16867500  |
| H   | -3.24626800 | 1.14962800  | 0.11871300  |
| H   | -3.22423500 | -0.49670900 | -0.53481500 |
| H   | 1.69369600  | 0.47762600  | -1.23041800 |
| C   | -0.52945800 | 2.11007000  | -0.02965900 |
| H   | 0.25620900  | 2.47867600  | -0.69003600 |
| H   | -1.47821700 | 2.52522300  | -0.37048300 |
| H   | -0.33449600 | 2.43523700  | 0.99011400  |
| O   | -0.80656900 | 0.32021900  | -1.47687100 |
| C   | -0.79968700 | -1.04526300 | -1.84798700 |
| H   | -1.02364700 | -1.08112000 | -2.91334100 |
| H   | 0.17768800  | -1.50081300 | -1.67254800 |
| H   | -1.55042900 | -1.61883100 | -1.30035500 |
| H   | 0.92654600  | -1.90993700 | 1.53302500  |
| H   | -1.74667500 | -1.82450100 | 1.90051100  |
| C   | 2.73069200  | 1.18929000  | 0.51431500  |
| H   | 3.67724200  | 1.35786400  | -0.00354300 |
| H   | 2.19723000  | 2.13717600  | 0.57675200  |
| H   | 2.94749100  | 0.85089300  | 1.53035300  |
| C   | 2.69676000  | -1.16961800 | -0.30927500 |
| H   | 3.59730400  | -0.99509300 | -0.89863700 |
| H   | 3.01071000  | -1.50866900 | 0.68039600  |
| H   | 2.12501600  | -1.96867300 | -0.78208200 |

### NHO 2a-MeOH adduct

|     |             |             |             |
|-----|-------------|-------------|-------------|
| O 1 |             |             |             |
| C   | 0.61544400  | -0.22534500 | 0.18788600  |
| C   | -1.64398400 | -0.34829500 | -0.38207200 |

|   |             |             |             |   |             |             |             |
|---|-------------|-------------|-------------|---|-------------|-------------|-------------|
| C | -1.32243100 | 0.94917900  | -0.37312200 | H | 1.78643800  | 0.31179500  | 2.07929700  |
| N | 0.08351800  | 1.07777800  | -0.19215100 | H | 1.01961700  | 1.80494200  | 1.51967000  |
| N | -0.46161800 | -1.10943700 | -0.22311300 | H | 0.49803500  | 1.06116400  | 3.03587700  |
| C | 0.62913400  | 2.27961200  | 0.42678600  | H | -1.05710000 | 1.05040200  | -1.82677000 |
| C | -0.47726100 | -2.46468600 | 0.28241100  | H | -0.32588900 | -1.11490800 | -2.53064100 |
| C | -2.94186800 | -1.02356700 | -0.65293800 | H | -0.89370100 | -2.67769900 | -1.94021200 |
| C | -2.15717500 | 2.14947800  | -0.65563300 | H | -2.00880400 | -1.30215400 | -1.99490100 |
| H | -3.25383700 | -1.64693800 | 0.18972000  | H | -0.98595200 | -2.98781400 | 0.64236100  |
| H | -3.72364100 | -0.28765000 | -0.83203000 | H | 0.54020600  | -1.75491000 | 2.02112200  |
| H | -2.87401000 | -1.67293200 | -1.53115400 | H | -2.22333500 | -1.71488200 | 0.72004900  |
| H | -3.16474100 | 1.85172600  | -0.94127800 | H | -0.99451600 | -1.22601800 | 2.74346300  |
| H | -2.24037600 | 2.81274300  | 0.20896900  | H | 2.01785200  | -1.31505100 | -1.30955200 |
| H | -1.72875900 | 2.73486900  | -1.47470000 | C | -0.71026000 | 2.58688000  | -0.38004700 |
| H | -0.14592400 | 2.83399100  | 0.95898800  | H | -1.33906600 | 3.29869500  | -0.91875800 |
| H | 1.39457900  | 2.00851800  | 1.15218700  | H | -0.85282500 | 2.76487900  | 0.68849700  |
| H | 1.07681300  | 2.94507600  | -0.31482100 | H | 0.33044800  | 2.78627600  | -0.63384900 |
| H | -0.65596700 | -2.53622000 | 1.36194300  | C | -2.56814300 | 0.92931900  | -0.30434700 |
| H | -1.25303800 | -3.02829000 | -0.23471300 | H | -3.21133100 | 1.69653800  | -0.74024600 |
| H | 0.47768600  | -2.94446400 | 0.06521200  | H | -2.95352200 | -0.04131400 | -0.61429800 |
| C | 1.95104800  | -0.59458000 | -0.48921100 | H | -2.64679100 | 0.99514800  | 0.78267200  |
| H | 2.22833500  | -1.57105000 | -0.07979500 | C | 3.45917200  | 0.16551600  | -0.67220700 |
| O | 0.89438700  | -0.32809500 | 1.58966000  | H | 4.27784000  | -0.55107600 | -0.59122600 |
| C | -0.18400000 | -0.01696600 | 2.45276100  | H | 3.53381300  | 0.66586400  | -1.63895100 |
| H | -1.06165900 | -0.63251200 | 2.24428100  | H | 3.57190200  | 0.91434900  | 0.11382300  |
| H | 0.16136700  | -0.21328000 | 3.46714600  |   |             |             |             |
| H | -0.47653300 | 1.03303200  | 2.37180200  |   |             |             |             |
| C | 3.08029300  | 0.38105800  | -0.16034200 |   |             |             |             |
| H | 3.19182800  | 0.52889100  | 0.91367700  |   |             |             |             |
| H | 4.02197300  | -0.00897100 | -0.55085500 |   |             |             |             |
| H | 2.90641000  | 1.35060100  | -0.63230300 |   |             |             |             |
| C | 1.78793000  | -0.72075900 | -1.99933900 |   |             |             |             |
| H | 2.74912000  | -0.95517400 | -2.46087300 |   |             |             |             |
| H | 1.07486100  | -1.50169200 | -2.26203400 |   |             |             |             |
| H | 1.42880500  | 0.22322800  | -2.41668300 |   |             |             |             |

### NHO 2b-MeOH adduct

|     |  |  |  |   |             |             |             |
|-----|--|--|--|---|-------------|-------------|-------------|
| O 1 |  |  |  | O | -0.05525000 | -0.83343600 | -1.43243800 |
|     |  |  |  | C | -1.37676600 | -1.22965700 | -1.75423200 |
|     |  |  |  | H | -1.93513300 | -1.54318900 | -0.87093400 |
|     |  |  |  | H | -1.28929200 | -2.07143300 | -2.44081200 |
|     |  |  |  | C | 0.08394400  | -0.04526300 | -0.25724800 |
|     |  |  |  | C | -1.44666700 | 1.10034900  | 1.15200600  |
|     |  |  |  | C | -1.32585400 | -0.32911900 | 1.65404400  |
|     |  |  |  | N | -0.12084200 | -0.79811100 | 0.98414700  |
|     |  |  |  | N | -0.95934400 | 0.95892100  | -0.20378800 |
|     |  |  |  | C | 1.52206000  | 0.51537600  | -0.34496100 |
|     |  |  |  | C | 0.02863900  | -2.23940700 | 0.94870200  |
|     |  |  |  | C | -0.85577600 | 2.13549500  | -1.03194500 |
|     |  |  |  | H | -0.87139700 | -2.75360200 | 0.58279400  |
|     |  |  |  | H | 0.86069900  | -2.51988900 | 0.30772100  |
|     |  |  |  | H | 0.23318500  | -2.60417600 | 1.95802700  |
|     |  |  |  | H | 1.56674200  | 1.08421900  | -1.27935000 |
|     |  |  |  | H | -0.55977800 | 1.84154800  | -2.04056300 |
|     |  |  |  | H | -1.83795800 | 2.60849700  | -1.09729300 |
|     |  |  |  | H | -0.14209100 | 2.88539400  | -0.66586100 |
|     |  |  |  | H | -2.47749300 | 1.46061900  | 1.15406900  |
|     |  |  |  | H | -2.21039000 | -0.91432800 | 1.36064900  |

### NHO 2b-EtOH adduct

|     |  |  |  |   |             |             |             |
|-----|--|--|--|---|-------------|-------------|-------------|
| O 1 |  |  |  | O | 1.10224000  | 0.43098500  | -0.69323000 |
|     |  |  |  | C | 2.12760900  | -0.54264900 | -0.54290000 |
|     |  |  |  | H | 2.04346600  | -1.03759400 | 0.42717900  |
|     |  |  |  | C | -0.16573700 | 0.09912900  | -0.14750300 |
|     |  |  |  | C | -1.14214700 | -1.90725300 | 0.66741500  |
|     |  |  |  | C | -0.41108900 | -1.23883100 | 1.82053600  |
|     |  |  |  | N | -0.19794000 | 0.11256400  | 1.31981100  |
|     |  |  |  | N | -0.50476300 | -1.27448100 | -0.46753600 |
|     |  |  |  | C | -1.12296700 | 1.15986100  | -0.73928200 |
|     |  |  |  | C | 0.83310700  | 0.85602300  | 2.01658100  |
|     |  |  |  | C | -0.97050800 | -1.59817900 | -1.79402800 |

|   |             |             |             |
|---|-------------|-------------|-------------|
| H | -0.83865600 | 1.78510400  | 1.76021100  |
| H | -1.21892100 | -0.39101300 | 2.73910200  |
| H | -1.92650400 | -0.41932500 | -2.23759800 |
| C | 2.57815400  | -0.58702400 | -0.40981000 |
| H | 3.56031700  | -0.14546700 | -0.59082500 |
| H | 2.62927300  | -1.12097000 | 0.54213100  |
| H | 2.37152200  | -1.30399400 | -1.20378400 |
| C | 1.84042000  | 1.44932400  | 0.82032600  |
| H | 2.86378300  | 1.81860900  | 0.72732800  |
| H | 1.17994400  | 2.31480000  | 0.86481800  |
| H | 1.75653200  | 0.90996600  | 1.76586600  |

|   |            |             |             |
|---|------------|-------------|-------------|
| C | 3.57591200 | -0.56159400 | -0.34815500 |
| H | 4.18347000 | -1.46728800 | -0.32064500 |
| H | 3.88481700 | 0.03394900  | -1.20871700 |
| H | 3.76809600 | 0.01512000  | 0.55823300  |

### NHO 2c-MeOH adduct

|     |             |             |             |
|-----|-------------|-------------|-------------|
| O 1 |             |             |             |
| C   | -1.12053100 | 1.37461700  | -1.24557800 |
| C   | -2.07857200 | 0.21335800  | -1.40269600 |
| C   | -2.19518800 | -0.51939400 | -0.07279300 |
| H   | -3.06125400 | 0.55863600  | -1.72573200 |
| H   | -1.50541600 | 2.09251800  | -0.50314500 |
| H   | -1.02007900 | 1.91234500  | -2.19134700 |
| H   | -3.05608600 | -0.13372000 | 0.48549500  |
| H   | -2.39202600 | -1.58749100 | -0.24132900 |
| C   | 0.30209900  | -0.02585200 | 0.25854800  |
| N   | -1.02810600 | -0.32196700 | 0.78262300  |
| N   | 0.19734400  | 0.86024900  | -0.90346800 |
| C   | 1.22184800  | 1.88812200  | -1.02864900 |
| H   | 2.18512300  | 1.52533300  | -0.68684100 |
| H   | 1.31018300  | 2.16640900  | -2.08139700 |
| H   | 0.98462700  | 2.79812600  | -0.46048300 |
| C   | -1.04931300 | -1.23773600 | 1.90613900  |
| H   | -0.22058500 | -1.03030700 | 2.58149200  |
| H   | -1.98482000 | -1.09744600 | 2.45363700  |
| H   | -0.99669200 | -2.29334400 | 1.59926200  |
| H   | -1.68615900 | -0.45105100 | -2.17426700 |
| C   | 1.13066900  | -1.29426400 | -0.07662300 |
| H   | 1.21123500  | -1.84522700 | 0.86491700  |
| C   | 0.42272100  | -2.17796400 | -1.09771900 |
| H   | 1.01813200  | -3.07299300 | -1.28902600 |
| H   | -0.56157900 | -2.50154900 | -0.75846500 |
| H   | 0.30549600  | -1.64370900 | -2.04279300 |
| C   | 2.55002100  | -0.99858300 | -0.55755700 |
| H   | 3.09996700  | -1.93626000 | -0.66271000 |
| H   | 2.53422300  | -0.51456600 | -1.53681600 |
| H   | 3.09316300  | -0.36293500 | 0.14171400  |
| O   | 1.04306100  | 0.58068100  | 1.31542700  |
| C   | 0.39730900  | 1.64628900  | 1.98877600  |
| H   | 1.18232200  | 2.24367800  | 2.45284600  |
| H   | -0.17459500 | 2.27378000  | 1.30505100  |
| H   | -0.28071900 | 1.27478800  | 2.76135000  |

### Anionic mechanism, transition states:

#### NHO 1a, TS1 ( $\nu = -952.24i$ (cm<sup>-1</sup>))

O 1

### NHO 2c-EtOH adduct

|     |             |             |             |
|-----|-------------|-------------|-------------|
| O 1 |             |             |             |
| C   | -0.72185000 | -1.22640300 | 1.72822700  |
| C   | -2.05299900 | -1.44454100 | 1.04238300  |
| C   | -1.82910400 | -1.53505200 | -0.46210900 |
| H   | -2.53321600 | -2.35455400 | 1.40383500  |
| H   | -0.05018100 | -2.08042100 | 1.54384300  |
| H   | -0.86079800 | -1.15306900 | 2.80952600  |
| H   | -1.73914200 | -2.58666500 | -0.75774100 |
| H   | -2.70003000 | -1.13856200 | -1.00282200 |
| C   | 0.00206800  | 0.23766700  | -0.16273200 |
| N   | -0.59315500 | -0.88387300 | -0.88707600 |
| N   | -0.15743600 | 0.03896900  | 1.28139500  |
| C   | 0.96081100  | 0.44945600  | 2.11950000  |
| H   | 1.45116000  | 1.32821200  | 1.71515900  |
| H   | 0.58207000  | 0.69056000  | 3.11561700  |
| H   | 1.72102800  | -0.33651200 | 2.23217300  |
| C   | -0.54005700 | -0.76893900 | -2.33108500 |
| H   | 0.41682100  | -0.35413200 | -2.64468300 |
| H   | -0.64313500 | -1.76638800 | -2.76605500 |
| H   | -1.34582200 | -0.14117200 | -2.74107400 |
| H   | -2.70371500 | -0.60304000 | 1.28513100  |
| C   | -0.54897100 | 1.62122400  | -0.60217500 |
| H   | -0.30694500 | 1.70585500  | -1.66570500 |
| C   | -2.06262400 | 1.70943300  | -0.44135200 |
| H   | -2.41176600 | 2.69083100  | -0.76851100 |
| H   | -2.59035700 | 0.95893000  | -1.03005200 |
| H   | -2.34067200 | 1.58647000  | 0.60732300  |
| C   | 0.10750500  | 2.80065400  | 0.11308600  |
| H   | -0.25320400 | 3.73537400  | -0.32154300 |
| H   | -0.15718100 | 2.80564400  | 1.17304800  |
| H   | 1.19332900  | 2.77951200  | 0.02036600  |
| O   | 1.37482200  | 0.29916300  | -0.53698000 |
| C   | 2.10749300  | -0.91597800 | -0.45168700 |
| H   | 1.78543500  | -1.49657200 | 0.41508200  |
| H   | 1.91639600  | -1.52661300 | -1.33958600 |

|   |             |             |             |
|---|-------------|-------------|-------------|
| C | 2.29905000  | 0.88525600  | 1.60649500  |
| H | 1.58959400  | 1.42984400  | 0.97754000  |
| H | 3.23902800  | 1.44224800  | 1.61273000  |
| H | 1.90431500  | 0.86057600  | 2.62686600  |
| C | 2.52572400  | -0.52486800 | 1.05515600  |
| H | 3.19501600  | -1.05763000 | 1.75565800  |
| H | 1.55487300  | -1.06754800 | 1.12423700  |
| O | 3.01084000  | -0.53401700 | -0.23587100 |
| C | -0.09762000 | -0.67169600 | -0.90899300 |
| C | -1.15863800 | 1.10545100  | -0.05546900 |
| C | -1.71267000 | -0.00354000 | 0.49186700  |
| N | -1.05241800 | -1.09817500 | -0.06621400 |
| N | -0.16017300 | 0.66777600  | -0.92202600 |
| C | 0.92661500  | -1.45266100 | -1.57286800 |
| C | -1.25506600 | -2.49027100 | 0.29443400  |
| C | 0.74808500  | 1.49872800  | -1.69884800 |
| C | -1.45805200 | 2.54798200  | 0.14656800  |
| C | -2.81673700 | -0.15580800 | 1.47687900  |
| H | -1.69608600 | 3.03960000  | -0.79842500 |
| H | -2.31222200 | 2.65837000  | 0.81110800  |
| H | -0.61063000 | 3.06983900  | 0.59694300  |
| H | -3.16291500 | 0.82542800  | 1.79422000  |
| H | -3.66581200 | -0.69066500 | 1.04616300  |
| H | -2.48674300 | -0.69975100 | 2.36397600  |
| H | -2.20912800 | -2.58814000 | 0.80398800  |
| H | -1.27145700 | -3.10273800 | -0.60433400 |
| H | -0.45466800 | -2.82967600 | 0.95365200  |
| H | 1.04908500  | -1.14212500 | -2.61116800 |
| H | 0.73219200  | -2.51988700 | -1.51552400 |
| H | 0.68971200  | 2.51990800  | -1.33194200 |
| H | 1.76100000  | 1.11907800  | -1.55910800 |
| H | 0.47150700  | 1.47850500  | -2.75319600 |
| H | 1.98301100  | -1.10879700 | -0.98503300 |

|   |             |             |             |
|---|-------------|-------------|-------------|
| O | -1.97560100 | -0.35759500 | -1.51725000 |
| O | -3.53352400 | 0.63471700  | 0.27009200  |
| C | -4.62446600 | 0.48027700  | -0.56937800 |
| H | -5.22905200 | -0.40559300 | -0.29697300 |
| H | -4.29483400 | 0.31752600  | -1.60844000 |
| C | -3.39592100 | -2.00304700 | 1.22442400  |
| H | -2.64603800 | -1.85314200 | 2.00459300  |
| H | -3.72884100 | -3.03991300 | 1.24835100  |
| O | -2.86033800 | -1.78505500 | -0.06937400 |
| C | 1.90293700  | -0.55082900 | -1.26552800 |
| C | 2.78362600  | 1.28091000  | -0.36746900 |
| C | 3.58118000  | 0.23402900  | -0.03130400 |
| N | 3.01694700  | -0.89243700 | -0.61246900 |
| N | 1.74418800  | 0.76513500  | -1.12766900 |
| C | 1.03914400  | -1.47283400 | -2.03788600 |
| C | 3.51207900  | -2.25755600 | -0.49205200 |
| C | 0.67703100  | 1.55906700  | -1.72952900 |
| C | 2.86857800  | 2.72419100  | -0.02763000 |
| C | 4.79764800  | 0.17401900  | 0.82123400  |
| H | 2.87277900  | 3.34163200  | -0.92752900 |
| H | 3.78302200  | 2.92316700  | 0.52669300  |
| H | 2.01969000  | 3.02622200  | 0.58965100  |
| H | 5.03202100  | 1.16882800  | 1.19350400  |
| H | 5.66309900  | -0.19230300 | 0.26621500  |
| H | 4.63844700  | -0.48008000 | 1.68121200  |
| H | 4.50702400  | -2.23016300 | -0.05895700 |
| H | 3.56581600  | -2.71761300 | -1.47617500 |
| H | 2.85328800  | -2.83812300 | 0.15318400  |
| H | -0.00074600 | -1.14268500 | -1.99473300 |
| H | 1.10309800  | -2.47712900 | -1.62175500 |
| H | 1.00836800  | 1.94793200  | -2.69209400 |
| H | 0.44388400  | 2.38257700  | -1.05901200 |
| H | -0.21400700 | 0.94115500  | -1.83860700 |
| H | 1.36535800  | -1.50798100 | -3.08040500 |
| H | -4.23425200 | -1.33169800 | 1.40721300  |
| C | -5.52500000 | 1.71047700  | -0.52768000 |
| H | -4.96887800 | 2.59656400  | -0.84211400 |
| H | -5.89304000 | 1.88351000  | 0.48623200  |
| H | -6.38699600 | 1.59045800  | -1.18953200 |

### NHO1a, TS2 ( $v = -230.57i$ ( $\text{cm}^{-1}$ ))

|     |             |             |             |
|-----|-------------|-------------|-------------|
| 0 1 |             |             |             |
| C   | 0.14618400  | 1.35675900  | 1.98345300  |
| C   | -0.93954600 | 1.06724000  | 1.16450400  |
| C   | -1.14125300 | -0.22665800 | 0.69556500  |
| C   | -0.24028500 | -1.22583700 | 1.06028100  |
| C   | 0.85044900  | -0.93654300 | 1.87337600  |
| C   | 1.04825200  | 0.35883300  | 2.33579200  |
| H   | 0.28420300  | 2.36559900  | 2.35533300  |
| H   | -1.65099900 | 1.83281500  | 0.88685000  |
| H   | -0.40128200 | -2.23856000 | 0.70491400  |
| H   | 1.54189800  | -1.72361200 | 2.15321900  |
| H   | 1.89662300  | 0.58870200  | 2.96991500  |
| C   | -2.22428700 | -0.56808500 | -0.31476300 |

### NHO1a, TS3 ( $v = -194.66i$ ( $\text{cm}^{-1}$ ))

|     |             |             |             |
|-----|-------------|-------------|-------------|
| 0 1 |             |             |             |
| C   | -1.66462800 | 1.29028700  | 0.24994900  |
| C   | -2.91723700 | -0.37376900 | 1.02274600  |
| C   | -3.53077700 | 0.12416300  | -0.08242200 |
| N   | -2.73656800 | 1.16834000  | -0.53740500 |
| N   | -1.75832000 | 0.36508200  | 1.20396400  |
| C   | -0.57412700 | 2.28149400  | 0.11130300  |



|   |             |             |             |
|---|-------------|-------------|-------------|
| C | -2.97307800 | 1.95052800  | -1.74417500 |
| C | -0.80484800 | 0.19310100  | 2.29680300  |
| C | -3.27501600 | -1.51091300 | 1.90917900  |
| C | -4.76942700 | -0.30449500 | -0.78425200 |
| H | -3.32127100 | -1.20047200 | 2.95427900  |
| H | -4.24679200 | -1.91087300 | 1.62761500  |
| H | -2.53585500 | -2.31107600 | 1.82107800  |
| H | -5.21144300 | -1.15086700 | -0.26341300 |
| H | -5.51065800 | 0.49605000  | -0.81803000 |
| H | -4.55221000 | -0.61358000 | -1.80902400 |
| H | -4.00898100 | 1.82599400  | -2.04396200 |
| H | -2.78985200 | 3.00267000  | -1.54262900 |
| H | -2.31924600 | 1.60604700  | -2.54547000 |
| H | 0.19883900  | 0.45409600  | 1.94804800  |
| H | -1.10604000 | 0.80863000  | 3.14463500  |
| H | -0.80632400 | -0.85484600 | 2.58736000  |
| C | -0.92203900 | -1.27927900 | -1.74521300 |
| C | 0.19024200  | -0.44989700 | -1.62711800 |
| C | 1.15098100  | -0.69328500 | -0.65256200 |
| C | 0.99122500  | -1.77943500 | 0.20388800  |
| C | -0.11986000 | -2.60392700 | 0.09412300  |
| C | -1.08095000 | -2.35606000 | -0.88299200 |
| H | -1.66473300 | -1.08572800 | -2.51185500 |
| H | 0.33039400  | 0.39539300  | -2.29184800 |
| H | 1.74149100  | -1.96017300 | 0.96277200  |
| H | -0.23778600 | -3.44427900 | 0.76870900  |
| H | -1.95076500 | -2.99770200 | -0.96706000 |
| C | 2.36490400  | 0.20931300  | -0.56188900 |
| O | 2.42750100  | 1.25469500  | -1.22478800 |
| O | 3.48716400  | -0.60582200 | -0.43571000 |
| C | 4.71012600  | 0.09994000  | -0.29852400 |
| H | 4.63645200  | 0.77172600  | 0.56130200  |
| H | 4.89097100  | 0.70641800  | -1.18925100 |
| C | 2.47388700  | 1.97229700  | 1.50972500  |
| H | 3.43294000  | 2.06689900  | 2.04594900  |
| H | 1.70603200  | 2.45860100  | 2.13739500  |
| O | 2.14311600  | 0.65771200  | 1.23289900  |
| H | 2.55951500  | 2.56822100  | 0.58612100  |
| C | 5.81300500  | -0.91774400 | -0.09970500 |
| H | 5.87117100  | -1.59232500 | -0.95537200 |
| H | 5.62973700  | -1.51216400 | 0.79666100  |
| H | 6.77535800  | -0.41555600 | 0.00920800  |
| H | 0.39105400  | 1.78592700  | 0.23126500  |
| H | -0.60185700 | 2.74174300  | -0.87364900 |
| H | -0.67247000 | 3.06067400  | 0.87086400  |

### NHO 1a, TS4 ( $\nu = -1008.07i$ (cm<sup>-1</sup>))

0 1

|   |             |             |             |
|---|-------------|-------------|-------------|
| C | 2.50149500  | -0.27017500 | 0.90053300  |
| H | 3.20919200  | -0.41896300 | 1.73234500  |
| H | 1.60661500  | -0.87679300 | 1.15834800  |
| O | 3.03323500  | -0.60613100 | -0.32915300 |
| C | -0.10612500 | -0.72994700 | -0.88998100 |
| C | -1.11381700 | 1.05777200  | 0.00348300  |
| C | -1.71529400 | -0.04599500 | 0.50995200  |
| N | -1.08567400 | -1.14657100 | -0.07096200 |
| N | -0.12119000 | 0.61086600  | -0.86418500 |
| C | 0.89506800  | -1.52985000 | -1.56780700 |
| C | -1.35410800 | -2.54071400 | 0.23653000  |
| C | 0.83581900  | 1.43415600  | -1.59002900 |
| C | -1.36771100 | 2.50321400  | 0.24314700  |
| C | -2.83927600 | -0.18806900 | 1.47368500  |
| H | -1.58465800 | 3.02710500  | -0.68952500 |
| H | -2.22199000 | 2.62319600  | 0.90590200  |
| H | -0.50683100 | 2.98544800  | 0.71107000  |
| H | -3.15787700 | 0.79500600  | 1.81342100  |
| H | -3.69867600 | -0.68163200 | 1.01520300  |
| H | -2.54193300 | -0.76781800 | 2.34956500  |
| H | -2.32655300 | -2.61586000 | 0.71448200  |
| H | -1.36805100 | -3.12163600 | -0.68289800 |
| H | -0.58984600 | -2.93539800 | 0.90700500  |
| H | 1.01464000  | -1.21263100 | -2.60491700 |
| H | 0.67528700  | -2.59240000 | -1.51905600 |
| H | 0.80166700  | 2.44389300  | -1.19086300 |
| H | 1.83205400  | 1.01167100  | -1.44458000 |
| H | 0.58397100  | 1.45919900  | -2.65052400 |
| H | 1.97472600  | -1.20398000 | -1.00327300 |
| H | 2.16976300  | 0.78639800  | 0.95940600  |

### NHO 1b, TS1 ( $\nu = -387.28i$ (cm<sup>-1</sup>))

0 1

|   |             |             |             |
|---|-------------|-------------|-------------|
| C | 0.80934500  | -0.01116200 | 0.63906700  |
| C | 1.43369200  | 1.26963100  | -1.16600600 |
| C | 2.23982400  | -0.03164400 | -1.16267500 |
| N | 1.56347100  | -0.80776300 | -0.12179800 |
| N | 0.76492900  | 1.21778500  | 0.13470300  |
| C | 0.05435100  | -0.40620800 | 1.81382300  |
| C | 2.02793900  | -2.13256200 | 0.23196600  |
| C | -0.14550900 | 2.26367000  | 0.57436800  |
| H | 2.92713800  | -2.08787900 | 0.85176600  |
| H | 1.24744000  | -2.67527500 | 0.75830800  |
| H | 2.25694500  | -2.67081100 | -0.68638000 |
| H | -0.41674100 | 2.86158700  | -0.29507900 |
| H | -1.05087700 | 1.81424900  | 0.98618200  |
| H | 0.33473600  | 2.91116400  | 1.30947300  |
| C | -3.39533500 | -0.89702000 | -1.18928800 |

|   |             |             |             |
|---|-------------|-------------|-------------|
| H | -4.31064100 | -0.31318500 | -1.06558300 |
| H | -3.56687800 | -1.88717500 | -0.76009200 |
| H | -3.19976400 | -1.01124000 | -2.25994700 |
| C | -2.23210300 | -0.21071800 | -0.46993700 |
| H | -1.31922600 | -0.81427500 | -0.67988500 |
| H | -2.04986300 | 0.75995700  | -0.98153600 |
| O | -2.44084600 | -0.05797300 | 0.88092800  |
| H | -1.10241200 | -0.35791500 | 1.47043200  |
| H | 0.35571300  | -1.37331500 | 2.20152500  |
| H | 0.14196800  | 0.35662100  | 2.58787900  |
| H | 2.20713500  | -0.55543400 | -2.11628900 |
| H | 2.05803300  | 2.15688400  | -1.24953900 |
| H | 3.28352100  | 0.13202000  | -0.87941500 |
| H | 0.67852100  | 1.28373800  | -1.95748900 |

|   |             |             |             |
|---|-------------|-------------|-------------|
| C | 0.20291000  | 1.66611400  | -0.42651000 |
| C | 0.13915100  | 0.13217300  | 2.19128700  |
| C | 2.92653800  | 1.30830400  | -1.69887200 |
| H | 0.26171000  | 0.91299500  | 2.94618200  |
| H | -0.81253100 | 0.23983000  | 1.66657200  |
| H | 0.15646900  | -0.84210600 | 2.67890700  |
| H | 0.25851600  | 1.68322800  | -1.51217600 |
| H | -0.75102800 | 1.22525100  | -0.13777300 |
| H | 2.35676600  | 2.19422400  | -1.96523300 |
| H | 3.98268900  | 1.57171000  | -1.67262900 |
| H | 2.77057100  | 0.52971600  | -2.44983900 |
| H | 0.26900100  | 2.69017100  | -0.04910100 |
| H | 4.35592300  | 0.33976200  | 0.56560200  |
| H | 2.93653400  | 0.14893500  | 2.48580300  |
| H | 3.52928000  | -1.00594400 | -0.25263500 |
| H | 2.46178100  | -1.43922600 | 1.83820400  |

### NHO 1b, TS2 ( $\nu = -206.59i$ (cm<sup>-1</sup>))

### NHO 1b, TS3 ( $\nu = -201.60i$ (cm<sup>-1</sup>))

0 1

|   |             |             |             |
|---|-------------|-------------|-------------|
| C | 0.13930900  | -2.90658300 | 0.43398700  |
| C | -1.02264000 | -2.18805900 | 0.18864500  |
| C | -1.11390400 | -1.35378900 | -0.92224500 |
| C | -0.03301000 | -1.25787800 | -1.79054100 |
| C | 1.12922200  | -1.98747300 | -1.55558100 |
| C | 1.21912400  | -2.81125000 | -0.44044500 |
| H | 0.20394600  | -3.54809400 | 1.30542400  |
| H | -1.86709800 | -2.25180500 | 0.86261900  |
| H | -0.11910600 | -0.60996200 | -2.65529000 |
| H | 1.96062600  | -1.92050700 | -2.24869200 |
| H | 2.12245500  | -3.38114300 | -0.25429600 |
| C | -2.38462100 | -0.59059700 | -1.24594300 |
| O | -2.38327800 | 0.29928100  | -2.10709000 |
| O | -2.60976700 | 0.20733100  | 0.43200500  |
| C | -3.15028000 | 1.48160500  | 0.34597400  |
| H | -4.25254500 | 1.46184600  | 0.28141800  |
| H | -2.80992700 | 1.98835800  | -0.57326600 |
| C | -4.69712700 | -0.97061000 | -1.51737300 |
| H | -4.99165400 | -0.21596100 | -0.78572200 |
| H | -5.40396200 | -1.79816700 | -1.49247300 |
| O | -3.43175200 | -1.50885300 | -1.18815900 |
| H | -4.68895700 | -0.52288800 | -2.51203300 |
| C | -2.77341800 | 2.33344800  | 1.55818100  |
| H | -1.69237800 | 2.47676700  | 1.62253300  |
| H | -3.10308600 | 1.84900000  | 2.48042600  |
| H | -3.24339400 | 3.31901700  | 1.50184300  |
| C | 1.32244700  | 0.87840600  | 0.14076000  |
| C | 3.38665000  | -0.10629600 | 0.35048500  |
| C | 2.55433200  | -0.37867100 | 1.60907100  |
| N | 1.24324500  | 0.16902200  | 1.24755000  |
| N | 2.54117500  | 0.84060200  | -0.38250900 |

0 1

|   |             |             |             |
|---|-------------|-------------|-------------|
| C | -0.80480800 | -0.82663400 | -2.17979600 |
| C | 0.38150900  | -0.14027000 | -1.93607600 |
| C | 1.14710000  | -0.43021500 | -0.81411400 |
| C | 0.71919600  | -1.42281200 | 0.06466100  |
| C | -0.46983400 | -2.10084000 | -0.16707500 |
| C | -1.23543000 | -1.80504100 | -1.29315400 |
| H | -1.38827500 | -0.60268600 | -3.06592000 |
| H | 0.72982100  | 0.62876400  | -2.61522500 |
| H | 1.32039700  | -1.64175300 | 0.93774100  |
| H | -0.79869000 | -2.86803600 | 0.52487400  |
| H | -2.15526800 | -2.34669800 | -1.48254600 |
| C | 2.44645300  | 0.32192000  | -0.60531400 |
| O | 2.68264700  | 1.35630200  | -1.24447300 |
| O | 3.45264100  | -0.62253500 | -0.40978600 |
| C | 4.73693600  | -0.06092800 | -0.18716800 |
| H | 4.68693300  | 0.60100100  | 0.68235600  |
| H | 5.03171100  | 0.53788700  | -1.05182900 |
| C | 2.59163400  | 2.05102300  | 1.48662600  |
| H | 3.50433600  | 2.04956500  | 2.10487200  |
| H | 1.82682300  | 2.61841200  | 2.04748800  |
| O | 2.15434700  | 0.77502200  | 1.17819100  |
| H | 2.81754800  | 2.62718600  | 0.57484800  |
| C | 5.71066500  | -1.19537000 | 0.04662300  |
| H | 5.73999400  | -1.85949700 | -0.81867700 |
| H | 5.42127500  | -1.77982700 | 0.92124300  |
| H | 6.71428900  | -0.80040600 | 0.21121200  |
| C | -1.75570500 | 0.79606900  | 1.01296900  |
| C | -3.59198200 | 0.56822500  | -0.35372900 |
| C | -2.69122900 | 1.69176500  | -0.88228700 |

|   |             |             |             |
|---|-------------|-------------|-------------|
| N | -1.52949800 | 1.61193200  | 0.00490200  |
| N | -2.94567300 | 0.21517700  | 0.91433200  |
| C | -0.82118400 | 0.62349000  | 2.15017600  |
| C | -0.40373200 | 2.51275300  | -0.15820300 |
| C | -3.45220300 | -0.89172100 | 1.69819900  |
| H | -0.63832800 | 3.49544700  | 0.25715700  |
| H | 0.48138900  | 2.09000700  | 0.31157000  |
| H | -0.20115600 | 2.60793100  | -1.22415000 |
| H | -0.98331400 | -0.33107200 | 2.64345900  |
| H | 0.22043900  | 0.67643500  | 1.80986400  |
| H | -3.01039100 | -0.88990100 | 2.69007600  |
| H | -4.53065300 | -0.77677400 | 1.80115500  |
| H | -3.23864000 | -1.84119700 | 1.20074100  |
| H | -1.00765000 | 1.42698400  | 2.86809900  |
| H | -4.61618100 | 0.89167000  | -0.17512600 |
| H | -3.15239700 | 2.67701000  | -0.78795500 |
| H | -3.60106100 | -0.30320800 | -1.01152800 |
| H | -2.37872600 | 1.53915300  | -1.91440100 |

### NHO 1c, TS1 ( $\nu = -208.88i$ (cm<sup>-1</sup>))

|     |             |             |             |
|-----|-------------|-------------|-------------|
| O 1 |             |             |             |
| C   | 3.45706000  | 0.48066400  | -0.01591700 |
| O   | 2.35801400  | 1.07694500  | -0.58840700 |
| H   | 4.29437700  | 1.19082800  | 0.13437200  |
| C   | -1.61764700 | -1.83033900 | -0.33101000 |
| C   | -2.93526500 | -1.08641400 | -0.32688700 |
| C   | -2.70828200 | 0.32359400  | -0.82702500 |
| H   | -3.65436500 | -1.59784000 | -0.96483100 |
| H   | -1.27521800 | -2.01922900 | -1.35292300 |
| H   | -1.71516700 | -2.79100900 | 0.17466900  |
| H   | -2.44193500 | 0.32635200  | -1.88835500 |
| H   | -3.60853200 | 0.92465500  | -0.70265800 |
| C   | -0.66693000 | 0.26474100  | 0.52859000  |
| C   | 0.39471100  | 0.95598100  | 1.26413600  |
| H   | 0.75878100  | 0.34859000  | 2.08884700  |
| N   | -1.64156100 | 0.96353300  | -0.05589300 |
| N   | -0.60062100 | -1.05861500 | 0.38344300  |
| C   | 0.56151600  | -1.80309000 | 0.86266800  |
| H   | 1.47559800  | -1.25174500 | 0.65043700  |
| H   | 0.48953600  | -2.00767600 | 1.93274800  |
| H   | 0.59350700  | -2.74836300 | 0.32518700  |
| C   | -1.62228100 | 2.42462400  | -0.05638800 |
| H   | -0.62707900 | 2.79728300  | -0.29078600 |
| H   | -2.30652200 | 2.76453600  | -0.82987800 |
| H   | -1.94819200 | 2.82839100  | 0.90357000  |
| H   | -3.33818700 | -1.05496200 | 0.68752200  |
| H   | 0.06959400  | 1.92091900  | 1.63800200  |
| H   | 3.23187900  | 0.09681400  | 1.00691000  |
| H   | 1.28246400  | 1.08605600  | 0.46750200  |
| C   | 3.99829100  | -0.69542600 | -0.83451100 |
| H   | 4.29817000  | -0.35156200 | -1.82757400 |
| H   | 4.86361600  | -1.16349500 | -0.35461900 |
| H   | 3.22180500  | -1.45454200 | -0.96566600 |

### NHO 1b, TS4 ( $\nu = -318.21i$ (cm<sup>-1</sup>))

|     |             |             |             |
|-----|-------------|-------------|-------------|
| O 1 |             |             |             |
| C   | -0.33620600 | -0.18729300 | -0.57563300 |
| C   | -2.08414700 | 0.65420800  | 0.66133400  |
| C   | -0.98306500 | 1.71186800  | 0.54903000  |
| N   | -0.07773900 | 1.10808700  | -0.42906700 |
| N   | -1.42797400 | -0.53268800 | 0.10987000  |
| C   | 0.53342700  | -1.07769200 | -1.32501300 |
| C   | 1.16033000  | 1.75677900  | -0.83439700 |
| C   | -2.14456100 | -1.78601800 | 0.00611200  |
| H   | 1.98377300  | 1.04170600  | -0.77979000 |
| H   | 1.35492400  | 2.57157300  | -0.13816600 |
| H   | 1.06970100  | 2.16929700  | -1.84023800 |
| H   | -2.66585800 | -1.96213000 | 0.94590900  |
| H   | -1.44814200 | -2.60390500 | -0.15530400 |
| H   | -2.87512700 | -1.75814600 | -0.80652100 |
| C   | 2.16654100  | -0.58201600 | 1.39213500  |
| H   | 2.03366500  | 0.50855100  | 1.55986200  |
| H   | 1.14991300  | -1.02050700 | 1.50138000  |
| O   | 2.75354400  | -0.88553000 | 0.18384500  |
| H   | 1.55468000  | -1.12469800 | -0.68940900 |
| H   | 2.73575200  | -0.95171600 | 2.26314000  |
| H   | 0.08707400  | -2.04957600 | -1.50584200 |
| H   | 0.81892700  | -0.61048400 | -2.26797100 |
| H   | -2.95908200 | 0.90501700  | 0.05501700  |
| H   | -0.44955100 | 1.85171500  | 1.49356500  |
| H   | -2.40126700 | 0.47672900  | 1.68749100  |
| H   | -1.35166400 | 2.67399000  | 0.19909200  |

### NHO 1c, TS2 ( $\nu = -199.71i$ (cm<sup>-1</sup>))

|     |             |             |             |
|-----|-------------|-------------|-------------|
| O 1 |             |             |             |
| C   | -0.50579600 | -1.87115500 | -1.94473900 |
| C   | 0.69324400  | -1.34106800 | -1.49131100 |
| C   | 0.97373100  | -1.30885500 | -0.12703400 |
| C   | 0.04604100  | -1.81844200 | 0.77195200  |
| C   | -1.15659700 | -2.35448600 | 0.31974100  |
| C   | -1.43465900 | -2.38264000 | -1.03994500 |
| H   | -0.72079600 | -1.88954600 | -3.00705200 |
| H   | 1.41911600  | -0.93608500 | -2.18456500 |
| H   | 0.28476100  | -1.79381300 | 1.82907900  |
| H   | -1.87194200 | -2.75413700 | 1.03070800  |

|   |             |             |             |
|---|-------------|-------------|-------------|
| H | -2.36782700 | -2.80239700 | -1.39849700 |
| C | 2.28147200  | -0.77178300 | 0.41055700  |
| O | 2.42717900  | -0.53859000 | 1.61523800  |
| O | 2.18143700  | 0.89971700  | -0.50319600 |
| C | 2.64291600  | 1.97219200  | 0.23408500  |
| H | 2.96465600  | 1.64262500  | 1.23713500  |
| H | 1.83805400  | 2.71385000  | 0.40774700  |
| C | 4.60186400  | -1.01217800 | 0.15943100  |
| H | 4.72390700  | 0.07084700  | 0.20928200  |
| H | 5.31423500  | -1.43096600 | -0.54894100 |
| O | 3.31216400  | -1.34227900 | -0.32081600 |
| H | 4.77284800  | -1.43537500 | 1.15035400  |
| C | 3.79157600  | 2.71495100  | -0.45170700 |
| H | 3.46682500  | 3.09011800  | -1.42521800 |
| H | 4.64407100  | 2.05287600  | -0.61719100 |
| H | 4.12705500  | 3.56537700  | 0.14901400  |
| C | -3.92313600 | -0.09765000 | 0.52459200  |
| C | -4.20047400 | 0.78380800  | -0.67355200 |
| C | -2.96900600 | 0.83244300  | -1.55183000 |
| H | -5.04478800 | 0.38982900  | -1.23698500 |
| H | -3.80927800 | -1.14519300 | 0.22899200  |
| H | -4.73470800 | -0.03299200 | 1.24879900  |
| H | -2.79108000 | -0.12452000 | -2.04842600 |
| H | -3.07038400 | 1.60093600  | -2.31818300 |
| C | -1.72877100 | 0.97116700  | 0.54975600  |
| C | -0.55747000 | 1.51771500  | 1.30284000  |
| H | -0.73520700 | 1.51554600  | 2.37208400  |
| H | 0.34945300  | 0.95008600  | 1.07590500  |
| N | -1.78820300 | 1.17437400  | -0.75501400 |
| N | -2.70097200 | 0.34284200  | 1.20105700  |
| C | -2.56074300 | -0.06576300 | 2.59869300  |
| H | -1.55789500 | -0.43683600 | 2.79522100  |
| H | -2.79572200 | 0.75429000  | 3.27867600  |
| H | -3.26178400 | -0.87883300 | 2.77331800  |
| C | -0.68660900 | 1.79654200  | -1.49324500 |
| H | -0.83248800 | 2.87832600  | -1.54810400 |
| H | 0.28065600  | 1.54322000  | -1.05338700 |
| H | -0.70838400 | 1.38614500  | -2.50240600 |
| H | -4.45507800 | 1.79083300  | -0.33706000 |
| H | -0.39149600 | 2.54557700  | 0.98178800  |

|   |             |             |             |
|---|-------------|-------------|-------------|
| C | -1.08129300 | -2.55710400 | 0.35565500  |
| H | -1.23417900 | -2.81060600 | -1.77273600 |
| H | 0.75364800  | -1.39180100 | -2.25435000 |
| H | 1.32878400  | -0.74164300 | 1.91366400  |
| H | -0.66869800 | -2.12754300 | 2.42089800  |
| H | -1.95037600 | -3.16670100 | 0.57570400  |
| C | 2.38363600  | -0.16323800 | -0.54278200 |
| O | 2.58865500  | 0.20399900  | -1.70752800 |
| O | 3.43825300  | -0.61271600 | 0.24547600  |
| C | 4.64797600  | 0.10503800  | 0.05597600  |
| H | 4.45473500  | 1.16888900  | 0.21984000  |
| H | 4.99679000  | -0.02247800 | -0.97155100 |
| C | 2.18214500  | 2.52829000  | -0.16839900 |
| H | 3.06208200  | 3.05016900  | 0.24461700  |
| H | 1.33094300  | 3.22894200  | -0.09522200 |
| O | 1.91587600  | 1.33578900  | 0.47848900  |
| H | 2.37727600  | 2.36722700  | -1.24136900 |
| C | 5.66423500  | -0.42296400 | 1.04529200  |
| H | 5.83727100  | -1.48857800 | 0.88655500  |
| H | 5.31626600  | -0.27817200 | 2.06909000  |
| H | 6.61378100  | 0.10064200  | 0.92524600  |
| C | -2.90102300 | 0.36824900  | -1.83050600 |
| C | -3.81660300 | -0.63270700 | -1.15999900 |
| C | -4.35703200 | -0.05527700 | 0.12784300  |
| H | -4.64031500 | -0.88185900 | -1.82746900 |
| H | -3.46483500 | 1.20951400  | -2.24501000 |
| H | -2.35442300 | -0.10642500 | -2.64507900 |
| H | -5.08635700 | 0.73718000  | -0.06225400 |
| H | -4.84647200 | -0.83035800 | 0.71661900  |
| C | -2.12956600 | 0.92990300  | 0.41580100  |
| C | -1.10704000 | 1.53439500  | 1.32421600  |
| H | -1.36050900 | 2.58821800  | 1.47674100  |
| H | -1.12119800 | 1.03581200  | 2.28996200  |
| N | -3.26986600 | 0.49518000  | 0.94293900  |
| N | -1.90559900 | 0.88671600  | -0.88797700 |
| C | -0.75572600 | 1.56428100  | -1.49845100 |
| H | -0.92105400 | 2.64341000  | -1.51938200 |
| H | 0.16753000  | 1.33504200  | -0.97335600 |
| H | -0.66496100 | 1.20109600  | -2.51915600 |
| C | -3.54530200 | 0.60789800  | 2.37561200  |
| H | -3.03919500 | -0.18118100 | 2.93453100  |
| H | -3.24497000 | 1.57981800  | 2.75849700  |
| H | -4.61847700 | 0.50482800  | 2.51415000  |
| H | -3.26230900 | -1.54539700 | -0.94418500 |
| H | -0.09481100 | 1.45788100  | 0.92278500  |

### NHO 1c, TS3 ( $v = -199.35i \text{ (cm}^{-1}\text{)})$

|     |             |             |             |
|-----|-------------|-------------|-------------|
| O 1 |             |             |             |
| C   | -0.68050000 | -2.35497900 | -0.95924300 |
| C   | 0.43335900  | -1.56824300 | -1.23431400 |
| C   | 1.16184000  | -0.99198800 | -0.20130000 |
| C   | 0.76293300  | -1.20466100 | 1.11546300  |
| C   | -0.35870200 | -1.97452300 | 1.39346900  |

### NHO 1c, TS4 ( $v = -264.95i \text{ (cm}^{-1}\text{)})$

O 1

|   |             |             |             |
|---|-------------|-------------|-------------|
| C | 3.87613700  | -0.02400200 | -0.32764500 |
| H | 4.13777700  | -1.01399500 | -0.74866300 |
| O | 2.80456600  | 0.57281400  | -0.95586900 |
| H | 4.80446100  | 0.57499000  | -0.36912500 |
| C | -1.47755600 | -1.73799800 | -0.34784800 |
| C | -2.71202600 | -0.89635400 | -0.11183500 |
| C | -2.44751500 | 0.51549500  | -0.58839300 |
| H | -3.56011900 | -1.31969300 | -0.64790800 |
| H | -1.31582800 | -1.90926900 | -1.41633600 |
| H | -1.57526500 | -2.70938200 | 0.13720200  |
| H | -2.34386700 | 0.55054000  | -1.67728600 |
| H | -3.26735300 | 1.17475500  | -0.30561600 |
| C | -0.23378600 | 0.23541100  | 0.42499600  |
| C | 0.98388400  | 0.79557500  | 1.01417000  |
| H | 1.36699500  | 0.14197700  | 1.79540200  |
| N | -1.22947600 | 1.03477200  | 0.03538500  |
| N | -0.30034000 | -1.07995100 | 0.21789200  |
| C | 0.85514600  | -1.93539600 | 0.48349600  |
| H | 1.76862600  | -1.44630800 | 0.14995500  |
| H | 0.92625400  | -2.18580400 | 1.54412900  |
| H | 0.72279700  | -2.85370900 | -0.08458300 |
| C | -1.09889600 | 2.48855200  | 0.10552900  |
| H | -0.14302700 | 2.81263500  | -0.30167000 |
| H | -1.89235500 | 2.92181300  | -0.49796800 |
| H | -1.20006200 | 2.84923800  | 1.13013700  |
| H | -2.95184700 | -0.88368300 | 0.95346300  |
| H | 0.83055600  | 1.79049000  | 1.41601600  |
| H | 3.69200700  | -0.20362500 | 0.75531000  |
| H | 1.80010000  | 0.79506700  | 0.12673400  |

### NHO 1d, TS1 ( $\nu = -861.18i$ (cm<sup>-1</sup>))

|     |             |             |             |
|-----|-------------|-------------|-------------|
| O 1 |             |             |             |
| C   | -2.24791800 | -0.00829100 | -1.62177200 |
| H   | -1.52579700 | 0.79000100  | -1.42919000 |
| H   | -3.24736900 | 0.43356200  | -1.62061200 |
| H   | -2.05087100 | -0.41532400 | -2.61841700 |
| C   | -2.14974600 | -1.08813100 | -0.54056300 |
| H   | -2.83486200 | -1.91002500 | -0.81912000 |
| H   | -1.13047800 | -1.53498000 | -0.61150300 |
| O   | -2.39731900 | -0.61110200 | 0.72856800  |
| C   | 0.73384500  | -0.01064300 | 0.69208800  |
| C   | 1.25675400  | 1.51041600  | -0.84810200 |
| C   | 1.95146300  | 0.38801200  | -1.13044000 |
| N   | 1.62546300  | -0.54316000 | -0.16199800 |
| N   | 0.50638200  | 1.24706800  | 0.28098100  |
| C   | 0.02955600  | -0.66803200 | 1.77431000  |
| C   | 2.09856700  | -1.91659400 | -0.10490500 |
| C   | -0.45961100 | 2.13873000  | 0.90925400  |

|   |             |             |             |
|---|-------------|-------------|-------------|
| H | 2.84808600  | -2.05301200 | -0.87917500 |
| H | 2.54348600  | -2.11452200 | 0.86842000  |
| H | 1.26860100  | -2.60221400 | -0.27622700 |
| H | 0.01653400  | -0.04315800 | 2.66840400  |
| H | 0.45393800  | -1.64266800 | 2.00030300  |
| H | -0.58381400 | 3.00900900  | 0.27013300  |
| H | -1.40627400 | 1.60415000  | 1.00534200  |
| H | -0.09686800 | 2.45419100  | 1.88693700  |
| H | -1.14966200 | -0.71929100 | 1.37509900  |
| H | 1.22495300  | 2.46521900  | -1.34203300 |
| H | 2.64857900  | 0.16771100  | -1.91900000 |

### NHO 1d, TS2 ( $\nu = -218.41i$ (cm<sup>-1</sup>))

|     |             |             |             |
|-----|-------------|-------------|-------------|
| O 1 |             |             |             |
| C   | 1.63206200  | 1.15324200  | -0.56955100 |
| C   | 3.50283600  | 0.67835600  | 0.51494200  |
| C   | 2.75535600  | 1.47856000  | 1.30877800  |
| N   | 1.59934500  | 1.76029700  | 0.61974600  |
| N   | 2.78949600  | 0.48727600  | -0.64706200 |
| C   | 0.58893700  | 1.26355000  | -1.61104700 |
| C   | 0.48222200  | 2.56934500  | 1.10385400  |
| C   | 3.24995800  | -0.28759700 | -1.79356600 |
| H   | 0.46907500  | 3.52431000  | 0.57919900  |
| H   | -0.45006800 | 2.02537900  | 0.92749400  |
| H   | 0.63002700  | 2.74054700  | 2.16694200  |
| H   | 2.42968500  | -0.88732500 | -2.17808300 |
| H   | 3.62652900  | 0.37934000  | -2.56711000 |
| H   | 4.04314500  | -0.94872000 | -1.45489000 |
| C   | 1.06090100  | -1.45524800 | 1.72338100  |
| C   | -0.15559100 | -0.97939900 | 1.24855100  |
| C   | -0.62451400 | -1.36524400 | -0.00670200 |
| C   | 0.14794400  | -2.23752800 | -0.77072300 |
| C   | 1.36079900  | -2.72303900 | -0.29285000 |
| C   | 1.82337400  | -2.32908700 | 0.95606500  |
| H   | 1.41915700  | -1.13622100 | 2.69521300  |
| H   | -0.74188100 | -0.28819200 | 1.83818600  |
| H   | -0.21083400 | -2.52335900 | -1.75221700 |
| H   | 1.94778700  | -3.40216100 | -0.90044300 |
| H   | 2.77261100  | -2.69620700 | 1.32855000  |
| C   | -1.93905200 | -0.90111400 | -0.62470600 |
| O   | -1.99120800 | -0.74662100 | -1.85062800 |
| O   | -2.01135800 | 0.77064200  | 0.21368100  |
| C   | -3.13351400 | 1.42879400  | -0.26394900 |
| H   | -4.03837200 | 1.14827100  | 0.30564900  |
| H   | -3.32705000 | 1.14908700  | -1.31237400 |
| C   | -3.21283100 | -1.58608200 | 1.32245700  |
| H   | -2.46514300 | -2.25614100 | 1.75518700  |
| H   | -4.20376900 | -1.99606900 | 1.51332900  |

|   |             |             |             |
|---|-------------|-------------|-------------|
| O | -3.08379300 | -1.49709100 | -0.08291400 |
| H | -3.12288700 | -0.59837000 | 1.77717700  |
| C | -2.95135800 | 2.94215800  | -0.18524100 |
| H | -2.09001000 | 3.24937400  | -0.78461700 |
| H | -2.77391900 | 3.25659500  | 0.84666100  |
| H | -3.83467400 | 3.46821900  | -0.55644700 |
| H | -0.39999900 | 1.20623100  | -1.14406000 |
| H | 0.67257000  | 0.44860600  | -2.32636700 |
| H | 0.69676900  | 2.21500700  | -2.13859000 |
| H | 4.46226000  | 0.21883000  | 0.67370400  |
| H | 2.93279700  | 1.85652200  | 2.29985900  |

|   |             |             |             |
|---|-------------|-------------|-------------|
| O | -1.70644100 | -0.96788800 | 1.04208400  |
| H | -1.94522500 | -2.68237600 | -0.07162900 |
| C | -5.48212600 | 0.56326900  | -0.04383100 |
| H | -5.59456500 | 1.38422200  | -0.75370600 |
| H | -5.37676400 | 0.98434200  | 0.95716500  |
| H | -6.38967000 | -0.04165900 | -0.07029200 |
| H | 0.17104100  | -1.67466200 | -0.21985200 |
| H | 1.30046000  | -2.24282100 | -1.45871700 |
| H | 1.30835200  | -2.99097000 | 0.14918800  |
| H | 4.86640000  | 0.71078400  | -0.17024900 |
| H | 3.45428300  | 0.99773200  | 2.19405600  |

### NHO 1d, TS3 ( $\nu = -198.92i$ (cm<sup>-1</sup>))

|     |             |             |             |
|-----|-------------|-------------|-------------|
| O 1 |             |             |             |
| C   | 2.17764900  | -1.06161700 | 0.06570800  |
| C   | 3.26876100  | 0.38625100  | 1.32894500  |
| C   | 3.96040200  | 0.24568800  | 0.17509500  |
| N   | 3.26865400  | -0.66169200 | -0.59621900 |
| N   | 2.16514600  | -0.42933100 | 1.24045000  |
| C   | 1.18047300  | -2.05208500 | -0.39442200 |
| C   | 3.63109500  | -1.07226700 | -1.94831100 |
| C   | 1.16261700  | -0.62354000 | 2.28769400  |
| H   | 4.58412100  | -0.61342100 | -2.19428200 |
| H   | 3.72725500  | -2.15460700 | -1.99561900 |
| H   | 2.87266300  | -0.73281300 | -2.65229400 |
| H   | 0.17631300  | -0.75621000 | 1.83065500  |
| H   | 1.43687100  | -1.48854900 | 2.89105400  |
| H   | 1.15508700  | 0.27051600  | 2.90648300  |
| C   | 1.24847300  | 1.86958600  | -1.20722600 |
| C   | 0.20435800  | 0.96087400  | -1.35940400 |
| C   | -0.80493800 | 0.88141500  | -0.40819200 |
| C   | -0.76788500 | 1.72898800  | 0.69640200  |
| C   | 0.27433300  | 2.63101800  | 0.85513300  |
| C   | 1.28689700  | 2.70424600  | -0.09798100 |
| H   | 2.03154700  | 1.92730100  | -1.95546100 |
| H   | 0.15830600  | 0.29936600  | -2.21760400 |
| H   | -1.55711600 | 1.65918200  | 1.43372100  |
| H   | 0.29943800  | 3.28083200  | 1.72210200  |
| H   | 2.10067200  | 3.40874300  | 0.02536100  |
| C   | -1.93076500 | -0.11377600 | -0.59855200 |
| O   | -1.87640500 | -0.96641700 | -1.49693700 |
| O   | -3.12811500 | 0.54400100  | -0.33068300 |
| C   | -4.27828300 | -0.28441500 | -0.39481100 |
| H   | -4.15805200 | -1.10701300 | 0.31574500  |
| H   | -4.37459000 | -0.70959000 | -1.39639500 |
| C   | -1.90708700 | -2.33495400 | 0.97385900  |
| H   | -2.84825900 | -2.65085300 | 1.45413100  |
| H   | -1.09133500 | -2.88996300 | 1.47046800  |

### NHO 1d, TS4 ( $\nu = -916.53i$ (cm<sup>-1</sup>))

|     |             |             |             |
|-----|-------------|-------------|-------------|
| O 1 |             |             |             |
| C   | -2.01716500 | -0.76682700 | -1.39639500 |
| H   | -2.54611500 | -1.29774300 | -2.20478500 |
| H   | -0.96974000 | -1.13898700 | -1.43428400 |
| O   | -2.59861900 | -0.94511700 | -0.15726300 |
| C   | 0.37660100  | -0.09236100 | 0.61286400  |
| C   | 0.99636300  | 1.68155400  | -0.58074400 |
| C   | 1.91625600  | 0.71422800  | -0.78035200 |
| N   | 1.52631600  | -0.37559000 | -0.02420100 |
| N   | 0.05114700  | 1.16889000  | 0.28505400  |
| C   | -0.45821400 | -0.98675100 | 1.38970700  |
| C   | 2.19548900  | -1.66560700 | 0.01926000  |
| C   | -1.17128200 | 1.82926700  | 0.72527800  |
| H   | 3.14184100  | -1.57815900 | -0.50698900 |
| H   | 2.38259200  | -1.94947900 | 1.05301900  |
| H   | 1.57870900  | -2.42285100 | -0.46414500 |
| H   | -0.77535000 | -0.51486900 | 2.32103100  |
| H   | 0.03750600  | -1.93183600 | 1.59364100  |
| H   | -1.28168300 | 2.75062800  | 0.15996000  |
| H   | -2.01171000 | 1.15825400  | 0.53397500  |
| H   | -1.10649700 | 2.06170100  | 1.78786200  |
| H   | -1.50450700 | -1.09036900 | 0.70871300  |
| H   | -1.96580900 | 0.29609600  | -1.70733000 |
| H   | 2.81068100  | 0.70229800  | -1.37727800 |
| H   | 0.92849900  | 2.68213200  | -0.96896000 |

### NHO 1e, TS1 ( $\nu = -871.35i$ (cm<sup>-1</sup>))

|     |             |            |             |
|-----|-------------|------------|-------------|
| O 1 |             |            |             |
| C   | -1.54861400 | 1.90059100 | -1.42572600 |
| H   | -0.83501300 | 1.07907100 | -1.53944000 |
| H   | -1.06271300 | 2.81791600 | -1.76856000 |
| H   | -2.40826200 | 1.70087500 | -2.07322900 |
| C   | -1.96336100 | 2.03853200 | 0.04143700  |
| H   | -2.74812000 | 2.81389900 | 0.10528200  |

|   |             |             |             |
|---|-------------|-------------|-------------|
| H | -2.47766100 | 1.09109500  | 0.32491900  |
| O | -0.90616900 | 2.30110300  | 0.88677800  |
| C | -0.22335000 | -0.76966500 | 0.61237900  |
| C | 0.77231200  | -1.23490200 | -1.32440600 |
| C | -0.39251700 | -1.91621100 | -1.28909600 |
| N | -0.99732400 | -1.62169100 | -0.08266900 |
| N | 0.85777600  | -0.51838900 | -0.14552200 |
| C | -0.53775900 | -0.12167200 | 1.87232400  |
| C | -2.29416700 | -2.10881700 | 0.35961900  |
| C | 1.93762000  | 0.40163300  | 0.25394200  |
| H | -2.19558700 | -2.60126600 | 1.32513600  |
| H | -2.99475700 | -1.27788100 | 0.44039200  |
| H | -2.65950900 | -2.82157900 | -0.37416600 |
| H | 0.31453500  | -0.13547800 | 2.55144300  |
| H | -1.40418400 | -0.57255500 | 2.34890400  |
| H | 1.45095400  | 1.13405100  | 0.89978000  |
| H | -0.72608500 | 1.06263500  | 1.53481500  |
| H | 1.53235600  | -1.19290500 | -2.08313000 |
| H | -0.84273900 | -2.58221400 | -2.00345600 |
| C | 2.49160700  | 1.12948000  | -0.95991400 |
| H | 3.18861400  | 1.89443700  | -0.61822300 |
| H | 3.03888500  | 0.45455700  | -1.62058500 |
| H | 1.69202700  | 1.61457800  | -1.52102600 |
| C | 3.01101200  | -0.36205500 | 1.01844100  |
| H | 3.78016000  | 0.32890200  | 1.36451900  |
| H | 2.58791900  | -0.87147600 | 1.88524700  |
| H | 3.47867100  | -1.10642400 | 0.37049100  |

|   |             |             |             |
|---|-------------|-------------|-------------|
| H | 1.21126000  | -1.09935900 | 2.75185700  |
| H | -0.84354500 | -0.13216000 | 1.75730000  |
| H | -0.74751400 | -3.06664800 | -1.33022000 |
| H | 1.29275200  | -4.06720800 | -0.33487300 |
| H | 2.28957800  | -3.06531500 | 1.70213300  |
| C | -2.18604400 | -1.01869500 | -0.53728700 |
| O | -2.24732200 | -1.08962300 | -1.77050000 |
| O | -1.98693700 | 0.77047600  | -0.02531900 |
| C | -3.00368100 | 1.50261000  | -0.61557400 |
| H | -3.92291300 | 1.48693800  | -0.00177700 |
| H | -3.27494500 | 1.07144300  | -1.59337600 |
| C | -3.49152700 | -1.13211700 | 1.50300300  |
| H | -2.83124300 | -1.80673300 | 2.05461200  |
| H | -4.52381700 | -1.35578100 | 1.76915400  |
| O | -3.39024400 | -1.32623600 | 0.10604500  |
| H | -3.25398200 | -0.09919900 | 1.76186700  |
| C | -2.57269500 | 2.95257800  | -0.82053900 |
| H | -1.69760600 | 2.99612200  | -1.47533400 |
| H | -2.30171600 | 3.41110600  | 0.13489100  |
| H | -3.37075600 | 3.54714000  | -1.27286300 |
| H | -0.33176000 | 0.71775000  | -1.44532200 |
| H | 0.53493400  | -0.51570200 | -2.35257300 |
| H | 0.88679400  | 1.19375800  | -2.67411700 |
| H | 4.46651400  | -0.59348800 | 0.42149100  |
| H | 3.21217600  | 1.43132500  | 1.80829300  |
| C | 1.04184100  | 3.53061900  | -0.22191800 |
| H | 1.00658400  | 3.33985000  | -1.29547200 |
| H | 0.27909000  | 4.27297300  | 0.01582500  |
| H | 2.02122000  | 3.94343700  | 0.02994100  |
| C | 0.78858100  | 2.50974400  | 2.07368600  |
| H | -0.06509500 | 3.14066700  | 2.32170700  |
| H | 0.69814400  | 1.57735600  | 2.63307500  |
| H | 1.69246800  | 3.03268200  | 2.39331100  |

**NHO 1e, TS2 ( $\nu = -217.99i$  (cm<sup>-1</sup>))**

|     |             |             |             |
|-----|-------------|-------------|-------------|
| 0 1 |             |             |             |
| C   | 1.69137800  | 0.44302600  | -0.86332500 |
| C   | 3.55258700  | -0.06315400 | 0.22120700  |
| C   | 2.93420200  | 0.93172700  | 0.89857200  |
| N   | 1.77824400  | 1.23062900  | 0.21344300  |
| N   | 2.76786000  | -0.35152700 | -0.87021000 |
| C   | 0.63266900  | 0.46814100  | -1.89695400 |
| C   | 0.77548000  | 2.26067700  | 0.57477300  |
| C   | 3.06093700  | -1.35424200 | -1.88764600 |
| H   | -0.19257600 | 1.82936300  | 0.30156800  |
| H   | 2.24963500  | -2.07792100 | -1.92822400 |
| H   | 3.18497300  | -0.87315800 | -2.85581800 |
| H   | 3.98214000  | -1.85766100 | -1.60877200 |
| C   | 0.77951400  | -1.54249200 | 1.86145300  |
| C   | -0.37635100 | -0.99999300 | 1.31181100  |
| C   | -0.93599900 | -1.54717300 | 0.15834200  |
| C   | -0.32018200 | -2.65263800 | -0.42482900 |
| C   | 0.82896300  | -3.20492400 | 0.13013700  |
| C   | 1.38740900  | -2.64573300 | 1.27296700  |

**NHO 1e, TS3 ( $\nu = -198.73i$  (cm<sup>-1</sup>))**

|     |             |             |             |
|-----|-------------|-------------|-------------|
| 0 1 |             |             |             |
| C   | -2.13254200 | -0.20938700 | -0.80027500 |
| C   | -3.79128200 | 0.13939900  | 0.62318300  |
| C   | -3.02776500 | -0.86688600 | 1.11121500  |
| N   | -2.00306000 | -1.06928800 | 0.21580400  |
| N   | -3.22398400 | 0.52950600  | -0.56586500 |
| C   | -1.26791000 | -0.10846700 | -1.99687800 |
| C   | -0.93024200 | -2.09121500 | 0.30776200  |
| C   | -3.71675200 | 1.58773800  | -1.43859500 |
| H   | -0.01202500 | -1.57590900 | 0.01764100  |
| H   | -2.97667600 | 2.38384600  | -1.50508600 |
| H   | -3.91836300 | 1.18351600  | -2.42859000 |
| H   | -4.63517300 | 1.97935000  | -1.01109800 |

|   |             |             |             |
|---|-------------|-------------|-------------|
| C | -1.02151800 | 1.88125800  | 1.67290600  |
| C | 0.04419900  | 0.99026900  | 1.59840900  |
| C | 0.95262100  | 1.05914600  | 0.55003700  |
| C | 0.79694400  | 2.03974800  | -0.42689600 |
| C | -0.27116600 | 2.92352600  | -0.36212600 |
| C | -1.18371200 | 2.84675500  | 0.68877700  |
| H | -1.72163000 | 1.82052300  | 2.49747700  |
| H | 0.19126500  | 0.23533600  | 2.36026400  |
| H | 1.50617200  | 2.08301200  | -1.24302100 |
| H | -0.39495400 | 3.67827000  | -1.13044500 |
| H | -2.01354500 | 3.54238500  | 0.74048200  |
| C | 2.10171000  | 0.08497400  | 0.53319900  |
| O | 2.10269800  | -0.92455900 | 1.23214100  |
| O | 3.26080800  | 0.74980200  | 0.22652100  |
| C | 4.40862900  | -0.08358700 | 0.11649800  |
| H | 4.20544300  | -0.85326100 | -0.63218300 |
| H | 4.59648700  | -0.57606700 | 1.07292000  |
| C | 1.92396700  | -1.90689000 | -1.48808900 |
| H | 2.85157400  | -2.15333100 | -2.03801400 |
| H | 1.09963800  | -2.40793600 | -2.03243800 |
| O | 1.71465100  | -0.55432600 | -1.35095500 |
| H | 2.00266300  | -2.41557700 | -0.50695600 |
| C | 5.57659600  | 0.78723700  | -0.28984900 |
| H | 5.75077500  | 1.56711600  | 0.45302100  |
| H | 5.38756100  | 1.26225100  | -1.25342200 |
| H | 6.48145000  | 0.18365600  | -0.37313400 |
| H | -1.30575500 | 0.90800300  | -2.38653400 |
| H | -0.22066400 | -0.34027500 | -1.74678500 |
| H | -1.62838800 | -0.78840800 | -2.77338200 |
| H | -3.12345500 | -1.43571000 | 2.01758900  |
| H | -4.67417400 | 0.61105600  | 1.01634000  |
| C | -1.24152000 | -3.23288300 | -0.65162200 |
| H | -0.43334800 | -3.96360100 | -0.61019700 |
| H | -2.17384500 | -3.72401800 | -0.36393400 |
| H | -1.32885500 | -2.88343700 | -1.68016200 |
| C | -0.78210400 | -2.59323400 | 1.73250800  |
| H | -1.63996800 | -3.19751700 | 2.03595600  |
| H | 0.10737000  | -3.22084300 | 1.77260700  |
| H | -0.64441700 | -1.77628800 | 2.43887900  |

### NHO 1e, TS4 ( $\nu = -882.03i$ (cm<sup>-1</sup>))

|     |             |             |             |
|-----|-------------|-------------|-------------|
| 0 1 |             |             |             |
| C   | -0.01673500 | 2.49184900  | -1.16016500 |
| H   | -0.23494600 | 3.39546400  | -1.75368900 |
| H   | -0.98118000 | 1.94044500  | -1.09835500 |
| O   | 0.51154300  | 2.77151500  | 0.08368800  |
| C   | -0.72026500 | -0.14948000 | 0.54224600  |
| C   | -0.06319300 | -1.57733000 | -1.03480000 |

|   |             |             |             |
|---|-------------|-------------|-------------|
| C | -1.41266900 | -1.58700000 | -1.01162900 |
| N | -1.80646000 | -0.70659500 | -0.02290100 |
| N | 0.35339000  | -0.67723800 | -0.07183800 |
| C | -0.69364400 | 0.91784400  | 1.52578800  |
| C | -3.17935300 | -0.36192400 | 0.31022400  |
| C | 1.74447900  | -0.32011700 | 0.26642200  |
| H | -3.84070400 | -0.99895000 | -0.27015100 |
| H | -3.35614600 | -0.52713700 | 1.37126500  |
| H | -3.37236900 | 0.68185000  | 0.06385900  |
| H | -0.01349500 | 0.68826200  | 2.34649100  |
| H | -1.68698500 | 1.12607300  | 1.91420800  |
| H | 1.69832900  | 0.73606300  | 0.54166400  |
| H | -0.17263000 | 1.88348700  | 0.92602500  |
| H | 0.64381300  | 1.86088700  | -1.78593000 |
| H | -2.12489400 | -2.13987600 | -1.59764300 |
| H | 0.62551400  | -2.12805600 | -1.64873900 |
| C | 2.22611300  | -1.17033300 | 1.43560800  |
| H | 3.23272900  | -0.86439100 | 1.72204500  |
| H | 1.57324500  | -1.06283400 | 2.30228000  |
| H | 2.25250200  | -2.22408600 | 1.14902300  |
| C | 2.64528000  | -0.46868100 | -0.94937500 |
| H | 2.24644200  | 0.07245300  | -1.80764800 |
| H | 3.62461100  | -0.05659900 | -0.70741300 |
| H | 2.78523400  | -1.51730600 | -1.21953900 |

### NHO 2a, TS1 ( $\nu = -1244.77i$ (cm<sup>-1</sup>))

|     |             |             |             |
|-----|-------------|-------------|-------------|
| 0 1 |             |             |             |
| C   | -0.23663300 | 0.35885900  | 0.51671500  |
| C   | -2.23666700 | 0.29808900  | -0.52583500 |
| C   | -1.99967400 | -0.93673200 | -0.02911500 |
| N   | -0.76445400 | -0.88537100 | 0.60613800  |
| N   | -1.14940900 | 1.09237300  | -0.16149600 |
| C   | 1.08816900  | 0.71239100  | 1.00288800  |
| C   | -0.11022000 | -2.04160100 | 1.20074000  |
| C   | -1.11155800 | 2.53132200  | -0.38492800 |
| C   | -3.38741900 | 0.82653900  | -1.30716500 |
| C   | -2.80904000 | -2.18323600 | -0.08792800 |
| H   | -3.96907500 | 1.55257700  | -0.73488500 |
| H   | -4.04948200 | 0.00842400  | -1.58292600 |
| H   | -3.05038500 | 1.31173300  | -2.22505700 |
| H   | -3.77611200 | -1.97739800 | -0.54166500 |
| H   | -2.98133700 | -2.58516700 | 0.91244500  |
| H   | -2.31424600 | -2.95645600 | -0.67936700 |
| H   | -0.42071800 | -2.16796400 | 2.23846600  |
| H   | 0.96785400  | -1.90707500 | 1.13429000  |
| H   | -0.39003500 | -2.92808000 | 0.63568000  |
| H   | -2.13322600 | 2.89384100  | -0.45894000 |
| H   | -0.57878500 | 2.77534100  | -1.30312100 |



|   |             |             |             |
|---|-------------|-------------|-------------|
| H | -0.63348800 | 3.01663800  | 0.45814300  |
| C | 1.22669400  | 0.63391200  | 2.52337800  |
| H | 0.75430600  | 1.48753000  | 3.02556200  |
| H | 2.28688200  | 0.64206900  | 2.79109600  |
| H | 0.79362600  | -0.27565300 | 2.94253400  |
| C | 1.73234700  | 1.97839400  | 0.45245500  |
| H | 1.42916400  | 2.90205000  | 0.95847800  |
| H | 1.56161400  | 2.09650400  | -0.61962700 |
| H | 2.81393500  | 1.88646500  | 0.58639700  |
| C | 3.46829800  | -0.36791800 | -2.19669300 |
| H | 3.59363600  | 0.67083000  | -1.88110500 |
| H | 4.43192000  | -0.87184700 | -2.09273300 |
| H | 3.18435500  | -0.37882500 | -3.25305300 |
| C | 2.41815800  | -1.05218500 | -1.32393100 |
| H | 2.27041700  | -2.08122200 | -1.69307900 |
| H | 1.44972000  | -0.53559600 | -1.49267900 |
| O | 2.74846000  | -1.04348100 | 0.02357800  |
| H | 1.91408500  | -0.22688400 | 0.53055000  |

|   |             |             |             |
|---|-------------|-------------|-------------|
| H | 0.74080600  | 3.07190300  | -2.17899600 |
| H | 0.01619500  | 1.46423400  | -2.46934300 |
| H | -0.98727700 | 2.79606500  | -1.95286800 |
| C | 0.10990700  | -2.83056400 | 0.79426500  |
| C | -1.03094600 | -2.07783200 | 0.54646000  |
| C | -1.17537200 | -1.38772900 | -0.65587900 |
| C | -0.13955900 | -1.44679800 | -1.58778000 |
| C | 1.01153200  | -2.18365600 | -1.33367700 |
| C | 1.13501400  | -2.88811800 | -0.14333800 |
| H | 0.20436500  | -3.36271100 | 1.73420700  |
| H | -1.79251800 | -1.98441800 | 1.30613200  |
| H | -0.24710300 | -0.89936700 | -2.51617900 |
| H | 1.80937500  | -2.20947900 | -2.06728700 |
| H | 2.03108500  | -3.46279600 | 0.06176200  |
| C | -2.37634100 | -0.54219400 | -1.03621400 |
| O | -2.23300700 | 0.37254600  | -1.83638700 |
| O | -2.49826900 | 0.29492700  | 0.83941800  |
| C | -3.23705300 | 1.44497800  | 0.68120500  |
| H | -4.31011700 | 1.23023600  | 0.50447600  |
| H | -2.90414500 | 2.01750800  | -0.20811300 |
| C | -4.00421100 | -2.06808000 | -0.06423200 |
| H | -3.40444900 | -2.97999500 | -0.10286600 |
| H | -5.04164200 | -2.31996800 | -0.27826100 |
| O | -3.61562000 | -1.14352900 | -1.06363000 |
| H | -3.92416400 | -1.60530500 | 0.91900600  |
| C | -3.12782000 | 2.36031800  | 1.90183000  |
| H | -2.08009600 | 2.61210800  | 2.08829700  |
| H | -3.51570600 | 1.85993100  | 2.79265000  |
| H | -3.68488100 | 3.29103100  | 1.75877400  |
| H | -0.72702500 | 1.43357700  | -0.06664900 |

### NHO 2a, TS2 ( $\nu = -199.72i$ (cm<sup>-1</sup>))

O 1

|   |             |             |             |
|---|-------------|-------------|-------------|
| C | 1.32113000  | 1.10056500  | -0.01805400 |
| C | 3.27914900  | 0.03007000  | 0.07117400  |
| C | 2.59647900  | -0.26001700 | 1.20660700  |
| N | 1.38515000  | 0.40494700  | 1.12401500  |
| N | 2.47358100  | 0.88658200  | -0.67056600 |
| C | 0.16665500  | 1.99796500  | -0.35978600 |
| C | 0.36695700  | 0.38810800  | 2.17272000  |
| C | 2.87862800  | 1.46028700  | -1.95129300 |
| C | 4.60286800  | -0.45498800 | -0.40407400 |
| C | 2.95209900  | -1.11958100 | 2.36524700  |
| H | 5.31731400  | 0.36091300  | -0.52672000 |
| H | 5.01280300  | -1.15449900 | 0.32102800  |
| H | 4.51113800  | -0.97755100 | -1.35841900 |
| H | 3.96595800  | -1.49678300 | 2.25219100  |
| H | 2.89843400  | -0.55996100 | 3.30071400  |
| H | 2.27574300  | -1.97390800 | 2.43951800  |
| H | 0.58030000  | 1.17009600  | 2.90251600  |
| H | -0.62636500 | 0.51189200  | 1.73042400  |
| H | 0.40565200  | -0.58112900 | 2.66382100  |
| H | 2.24301800  | 1.09079700  | -2.75164200 |
| H | 2.83388200  | 2.54459600  | -1.90540900 |
| H | 3.90387300  | 1.16282400  | -2.14446500 |
| C | 0.24968900  | 3.27864300  | 0.48500200  |
| H | 0.30768900  | 3.06554000  | 1.55274800  |
| H | 1.12419700  | 3.87042700  | 0.20408300  |
| H | -0.64392900 | 3.87927900  | 0.30715900  |
| C | -0.00019800 | 2.34906600  | -1.83712300 |

### NHO 2a, TS3 ( $\nu = -187.23i$ (cm<sup>-1</sup>))

O 1

|   |             |             |             |
|---|-------------|-------------|-------------|
| C | 1.75880900  | 1.00245200  | 0.14273900  |
| C | 3.50976300  | -0.37276700 | -0.00176800 |
| C | 2.72650300  | -0.80445300 | 1.01940100  |
| N | 1.64600300  | 0.05998400  | 1.08542700  |
| N | 2.89521800  | 0.75959400  | -0.52262200 |
| C | 0.78951400  | 2.13099800  | -0.01723500 |
| C | 0.58503800  | -0.01465800 | 2.08877400  |
| C | 3.45252600  | 1.56612200  | -1.60396800 |
| H | 0.48941300  | -1.04830000 | 2.40937300  |
| H | 0.84330100  | 0.61058400  | 2.94354000  |
| H | -0.35873100 | 0.29863600  | 1.64400900  |
| H | 2.89415400  | 1.41154900  | -2.52478500 |
| H | 3.43531800  | 2.61630700  | -1.32671200 |
| H | 4.48406000  | 1.26476700  | -1.75577800 |
| C | 0.34582700  | -2.87409100 | -0.38512200 |

|   |             |             |             |
|---|-------------|-------------|-------------|
| C | -0.80561200 | -2.34937400 | 0.19202100  |
| C | -1.39725300 | -1.20318800 | -0.32528600 |
| C | -0.82609800 | -0.58449400 | -1.43335400 |
| C | 0.33390900  | -1.09658700 | -2.00287100 |
| C | 0.92427600  | -2.24381200 | -1.47993700 |
| H | 0.78912600  | -3.77786700 | 0.01660800  |
| H | -1.26337700 | -2.82211600 | 1.05285300  |
| H | -1.29341100 | 0.30748000  | -1.83125000 |
| H | 0.77699100  | -0.60746500 | -2.86384100 |
| H | 1.82581200  | -2.64527000 | -1.92769600 |
| C | -2.66408500 | -0.68621500 | 0.32708800  |
| O | -3.01639400 | -1.11446700 | 1.43428800  |
| O | -3.60623000 | -0.47778300 | -0.67557100 |
| C | -4.84289900 | 0.03841400  | -0.20764500 |
| H | -4.65425400 | 0.98141300  | 0.31394000  |
| H | -5.28768400 | -0.66036600 | 0.50443500  |
| C | -2.44482300 | 1.61851600  | 1.76288400  |
| H | -3.28608500 | 2.33003300  | 1.70921300  |
| H | -1.59535200 | 2.16312600  | 2.21508800  |
| O | -2.11065500 | 1.09027400  | 0.52899100  |
| H | -2.73714000 | 0.82747200  | 2.47249800  |
| C | -5.74745800 | 0.24606700  | -1.40262000 |
| H | -5.91611300 | -0.69715100 | -1.92461400 |
| H | -5.30621600 | 0.95544100  | -2.10430100 |
| H | -6.71318600 | 0.63653100  | -1.07809600 |
| C | 1.14798000  | 3.27101000  | 0.94730900  |
| H | 1.18844700  | 2.92497600  | 1.98125500  |
| H | 2.11444700  | 3.71315500  | 0.69363600  |
| H | 0.38740800  | 4.05031300  | 0.87901300  |
| C | 0.61164600  | 2.64910200  | -1.44719700 |
| H | 0.56209800  | 1.83768200  | -2.17344100 |
| H | -0.33490700 | 3.18933400  | -1.49000700 |
| H | 1.39889300  | 3.34139900  | -1.74568700 |
| H | -0.18303400 | 1.71531100  | 0.27191200  |
| C | 2.88329300  | -1.95422800 | 1.94716700  |
| H | 2.05794900  | -2.66065800 | 1.83955200  |
| H | 3.81132100  | -2.47929900 | 1.73268400  |
| H | 2.91304200  | -1.61927200 | 2.98560800  |
| C | 4.77103000  | -0.93283400 | -0.55675500 |
| H | 4.66189300  | -1.17500900 | -1.61564100 |
| H | 5.60487600  | -0.23683300 | -0.44839400 |
| H | 5.02653100  | -1.84768500 | -0.02698100 |

### NHO 2a, TS4 ( $\nu = -1221.52i$ (cm<sup>-1</sup>))

|     |             |             |             |
|-----|-------------|-------------|-------------|
| O 1 |             |             |             |
| C   | 0.17255500  | 0.35548300  | -0.34573500 |
| C   | -2.02375600 | 0.39533200  | 0.16841000  |
| C   | -1.72100300 | -0.86295700 | -0.22159100 |

|   |             |             |             |
|---|-------------|-------------|-------------|
| N | -0.36622300 | -0.87398900 | -0.53281200 |
| N | -0.84970600 | 1.14137700  | 0.06452700  |
| C | 1.59388300  | 0.64123600  | -0.47459900 |
| C | 0.36199200  | -2.07224200 | -0.92466800 |
| C | -0.81141000 | 2.58335400  | 0.26588400  |
| C | -3.31048600 | 0.98837500  | 0.62294400  |
| C | -2.56863600 | -2.08043500 | -0.33045800 |
| H | -3.69730900 | 1.71828900  | -0.09160000 |
| H | -4.05548800 | 0.20374500  | 0.73727600  |
| H | -3.19553200 | 1.48740900  | 1.58697500  |
| H | -3.60852700 | -1.82795100 | -0.13460800 |
| H | -2.50525600 | -2.51319400 | -1.33070400 |
| H | -2.26439000 | -2.84598200 | 0.38660900  |
| H | 0.32057900  | -2.21128700 | -2.00542600 |
| H | 1.39353500  | -1.98541500 | -0.58717000 |
| H | -0.09733400 | -2.93008300 | -0.43880000 |
| H | -1.79953300 | 2.98474100  | 0.05745200  |
| H | -0.53429100 | 2.83187700  | 1.28973300  |
| H | -0.10486700 | 3.02688900  | -0.42566200 |
| C | 2.13371200  | 0.47524800  | -1.89532300 |
| H | 1.87248800  | 1.32842300  | -2.53380200 |
| H | 3.22470300  | 0.41088800  | -1.86525800 |
| H | 1.76887800  | -0.42703500 | -2.38740600 |
| C | 2.12685200  | 1.91465400  | 0.16949300  |
| H | 1.99875300  | 2.81927000  | -0.43600800 |
| H | 1.69424500  | 2.09266300  | 1.15582600  |
| H | 3.20270800  | 1.78786500  | 0.31743000  |
| C | 1.78892300  | -1.33258100 | 2.04360900  |
| H | 1.13584500  | -2.21301600 | 1.89931200  |
| H | 1.11184500  | -0.45906300 | 2.12270100  |
| O | 2.71968500  | -1.17806300 | 1.02563600  |
| H | 2.17646900  | -0.31243200 | 0.25804100  |
| H | 2.26074800  | -1.44662100 | 3.03021000  |

### NHO 2b, TS1 ( $\nu = -1019.62i$ (cm<sup>-1</sup>))

|     |             |             |             |
|-----|-------------|-------------|-------------|
| O 1 |             |             |             |
| C   | -0.80272200 | 0.16072700  | 0.20112400  |
| C   | -2.12190900 | -1.27690200 | -1.04265800 |
| C   | -1.75825600 | -1.95122700 | 0.27629700  |
| N   | -0.75883200 | -1.03337900 | 0.81467300  |
| N   | -1.68562400 | 0.09975600  | -0.80904000 |
| C   | 0.06824600  | 1.25783200  | 0.58948800  |
| C   | 0.09648300  | -1.43796600 | 1.91138300  |
| C   | -2.11124100 | 1.14189200  | -1.72101000 |
| H   | -0.41965500 | -1.35230300 | 2.87125100  |
| H   | 1.00554900  | -0.83902500 | 1.90692800  |
| H   | 0.37093600  | -2.48209400 | 1.75692100  |
| H   | -3.14093900 | 0.93137300  | -2.00871300 |

|   |             |             |             |
|---|-------------|-------------|-------------|
| H | -1.49457600 | 1.16659400  | -2.62266000 |
| H | -2.08440000 | 2.10894300  | -1.23347400 |
| C | 3.49463800  | -0.75240500 | -1.53443000 |
| H | 3.67680500  | 0.24179500  | -1.94930100 |
| H | 4.38770300  | -1.05857300 | -0.98485100 |
| H | 3.34191800  | -1.45149700 | -2.36179000 |
| C | 2.28743000  | -0.71787000 | -0.59984100 |
| H | 2.08479600  | -1.75336800 | -0.25851800 |
| H | 1.40049300  | -0.43855500 | -1.21128700 |
| O | 2.45312000  | 0.15009400  | 0.46238400  |
| H | 1.21599100  | 0.70944300  | 0.57595100  |
| H | -1.32614300 | -2.94119800 | 0.13988200  |
| H | -3.18861100 | -1.30472700 | -1.25603100 |
| H | -2.61278200 | -2.02616000 | 0.95503300  |
| H | -1.57599400 | -1.70354700 | -1.88984500 |
| C | 0.24076300  | 2.43434600  | -0.36289000 |
| H | 1.17540400  | 2.93460200  | -0.09794500 |
| H | -0.55181800 | 3.18573400  | -0.29106200 |
| H | 0.33530700  | 2.11892800  | -1.40266800 |
| C | -0.14827900 | 1.74577200  | 2.02415000  |
| H | 0.72743400  | 2.31473400  | 2.34550500  |
| H | -0.29565600 | 0.93789700  | 2.73933300  |
| H | -1.01645000 | 2.41042300  | 2.08916000  |

|   |             |             |             |
|---|-------------|-------------|-------------|
| C | -2.23057700 | 2.87724200  | 1.60069600  |
| H | -1.16180100 | 2.86103100  | 1.82487700  |
| H | -2.76742100 | 2.64928300  | 2.52487400  |
| H | -2.50055000 | 3.89009200  | 1.28608300  |
| C | 1.78968600  | 0.77870100  | 0.01141300  |
| C | 3.72431400  | -0.44371100 | 0.24228200  |
| C | 2.99487800  | -0.38737900 | 1.58333200  |
| N | 1.72509500  | 0.24535300  | 1.22079800  |
| N | 2.94451000  | 0.49166300  | -0.57841400 |
| C | 0.69540900  | 1.66654100  | -0.50360600 |
| C | 0.73021700  | 0.50138900  | 2.24996300  |
| C | 3.36127900  | 0.74761100  | -1.94682000 |
| H | 1.01718300  | 1.37373200  | 2.84434700  |
| H | -0.26260400 | 0.63132600  | 1.80968800  |
| H | 0.70401100  | -0.37323000 | 2.89901000  |
| H | 2.90045900  | 0.04311100  | -2.64173100 |
| H | 3.12680600  | 1.76573900  | -2.23872100 |
| H | 4.44179300  | 0.62337400  | -1.98402900 |
| C | 0.93535600  | 3.07876200  | 0.05607400  |
| H | 1.03949200  | 3.08090100  | 1.14148200  |
| H | 1.83824800  | 3.51291500  | -0.37911300 |
| H | 0.08513000  | 3.70950100  | -0.20734900 |
| C | 0.49227300  | 1.72117900  | -2.01997000 |
| H | 1.16282500  | 2.43573900  | -2.49724100 |
| H | 0.60987100  | 0.74920100  | -2.49337200 |
| H | -0.53318400 | 2.04182900  | -2.20048300 |
| H | -0.22180500 | 1.25918300  | -0.06596400 |
| H | 3.68595000  | -1.43752800 | -0.20934000 |
| H | 2.81374900  | -1.37054000 | 2.01456500  |
| H | 3.51285800  | 0.23782600  | 2.31519000  |
| H | 4.75975300  | -0.11444400 | 0.30252100  |

### NHO 2b, TS2 ( $\nu = -201.76i$ (cm<sup>-1</sup>))

|     |             |             |             |
|-----|-------------|-------------|-------------|
| 0 1 |             |             |             |
| C   | 0.27987200  | -2.77373500 | 1.20979500  |
| C   | -0.85090900 | -2.02418800 | 0.91949100  |
| C   | -1.00941000 | -1.45734200 | -0.34201100 |
| C   | -0.03459800 | -1.66183900 | -1.31110800 |
| C   | 1.10026800  | -2.41464700 | -1.02382900 |
| C   | 1.25894200  | -2.97225600 | 0.23831300  |
| H   | 0.40142500  | -3.20966000 | 2.19491300  |
| H   | -1.61604300 | -1.85431500 | 1.66576500  |
| H   | -0.19018800 | -1.24731900 | -2.29908200 |
| H   | 1.85023100  | -2.57670700 | -1.79009100 |
| H   | 2.13718900  | -3.56585600 | 0.46638500  |
| C   | -2.25481900 | -0.70028100 | -0.72299600 |
| O   | -2.29883100 | 0.02924400  | -1.70554600 |
| O   | -2.18668300 | 0.57417900  | 0.89092700  |
| C   | -2.57303900 | 1.84314700  | 0.52451300  |
| H   | -3.66063600 | 1.92410900  | 0.32962100  |
| H   | -2.10166800 | 2.15869500  | -0.42876900 |
| C   | -4.59656000 | -0.81315500 | -0.59131200 |
| H   | -4.68804100 | 0.13624100  | -0.06327900 |
| H   | -5.35913200 | -1.50677200 | -0.24342000 |
| O   | -3.34629500 | -1.41044000 | -0.29435200 |
| H   | -4.70657400 | -0.64660200 | -1.66323600 |

### NHO 2b, TS3 ( $\nu = -202.32i$ (cm<sup>-1</sup>))

|     |             |             |             |
|-----|-------------|-------------|-------------|
| 0 1 |             |             |             |
| C   | 2.11218400  | -0.66216300 | 0.03907300  |
| C   | 3.75880900  | 0.83662700  | -0.53940400 |
| C   | 2.90254600  | 0.52193600  | -1.76587100 |
| N   | 1.81487400  | -0.27212200 | -1.19046600 |
| N   | 3.25420600  | -0.12531500 | 0.44833400  |
| C   | 1.26104300  | -1.65222200 | 0.77355300  |
| C   | 0.78151100  | -0.81255200 | -2.05810700 |
| C   | 3.88811600  | -0.21673200 | 1.75090900  |
| H   | 0.55017300  | -0.05471000 | -2.80468900 |
| H   | 1.13880200  | -1.71377300 | -2.56318500 |
| H   | -0.12401500 | -1.01505400 | -1.49003800 |
| H   | 3.45577100  | 0.49550200  | 2.45621900  |
| H   | 3.80985300  | -1.22422300 | 2.14568600  |
| H   | 4.94305800  | 0.01551500  | 1.61707200  |

|   |             |             |             |
|---|-------------|-------------|-------------|
| C | 0.48120300  | 2.83745100  | -0.91073000 |
| C | -0.60602400 | 2.02496400  | -1.21841100 |
| C | -1.15957600 | 1.19069700  | -0.25515500 |
| C | -0.61205100 | 1.17204300  | 1.02447500  |
| C | 0.47974400  | 1.97298600  | 1.33291300  |
| C | 1.02722500  | 2.81310500  | 0.36649600  |
| H | 0.89528200  | 3.49668600  | -1.66508700 |
| H | -1.04225300 | 2.03179600  | -2.21020400 |
| H | -1.04528100 | 0.51308900  | 1.76655600  |
| H | 0.89876600  | 1.95779800  | 2.33305300  |
| H | 1.86381900  | 3.45538400  | 0.61564800  |
| C | -2.37319000 | 0.35678700  | -0.61787100 |
| O | -2.68571400 | 0.18446300  | -1.80357000 |
| O | -3.35448900 | 0.61032300  | 0.33640200  |
| C | -4.55124500 | -0.12876900 | 0.14796600  |
| H | -4.30555800 | -1.19415200 | 0.11969200  |
| H | -5.00582600 | 0.14117700  | -0.80809100 |
| C | -2.03664300 | -2.34326900 | -0.75059800 |
| H | -2.83407800 | -2.99178100 | -0.35033800 |
| H | -1.14837900 | -2.98513200 | -0.89950800 |
| O | -1.75675400 | -1.26918000 | 0.07437200  |
| H | -2.36339600 | -2.00824900 | -1.74841800 |
| C | -5.47971600 | 0.18634200  | 1.30080200  |
| H | -5.70464600 | 1.25362900  | 1.33221700  |
| H | -5.02468300 | -0.09878500 | 2.25051600  |
| H | -6.41787200 | -0.35921600 | 1.18932800  |
| C | 1.71966800  | -3.06794600 | 0.38836600  |
| H | 1.70109000  | -3.22209100 | -0.69134700 |
| H | 2.73160100  | -3.26324000 | 0.75080900  |
| H | 1.04548900  | -3.79234800 | 0.84689900  |
| C | 1.18139000  | -1.48937800 | 2.29518500  |
| H | 1.17134500  | -0.44398500 | 2.60148600  |
| H | 0.24414600  | -1.93906400 | 2.62542500  |
| H | 1.99082100  | -2.00106500 | 2.81539300  |
| H | 0.24427300  | -1.49279600 | 0.39708400  |
| H | 2.50044900  | 1.41176400  | -2.24650400 |
| H | 3.59840300  | 1.85178600  | -0.17032800 |
| H | 4.82223100  | 0.67710300  | -0.70687000 |
| H | 3.43662100  | -0.07976500 | -2.50573700 |

### NHO 2b, TS4 ( $\nu = -960.78i$ (cm<sup>-1</sup>))

|     |             |             |             |
|-----|-------------|-------------|-------------|
| O 1 |             |             |             |
| C   | -0.39643600 | 0.14956100  | 0.28645900  |
| C   | -2.42872400 | -0.56368700 | -0.55837200 |
| C   | -1.81623200 | -1.68365400 | 0.27598300  |
| N   | -0.47220700 | -1.17058700 | 0.52147700  |
| N   | -1.56610100 | 0.56983700  | -0.22257800 |
| C   | 0.82901100  | 0.89967200  | 0.51191200  |

|   |             |             |             |
|---|-------------|-------------|-------------|
| C | 0.57148000  | -2.04708100 | 1.01170000  |
| C | -1.97251600 | 1.90618700  | -0.60793600 |
| H | 0.48853000  | -2.19976300 | 2.09103400  |
| H | 1.54642800  | -1.63560400 | 0.75420200  |
| H | 0.46112500  | -3.01218000 | 0.51597800  |
| H | -3.05324600 | 1.97175500  | -0.48636300 |
| H | -1.72517000 | 2.11978300  | -1.65054700 |
| H | -1.51278900 | 2.64589500  | 0.03645800  |
| C | 1.83568100  | -0.89747400 | -1.92579400 |
| H | 1.47818700  | -1.93818500 | -1.80487600 |
| H | 0.92061200  | -0.28047400 | -2.06024900 |
| O | 2.61102900  | -0.46278300 | -0.86688000 |
| H | 1.69346500  | 0.21692200  | -0.11396600 |
| H | -1.76708200 | -2.63082800 | -0.25864400 |
| H | -3.46081000 | -0.34640100 | -0.29026900 |
| H | -2.34463300 | -1.83588500 | 1.22159900  |
| H | -2.37310000 | -0.76952000 | -1.63173000 |
| C | 0.97093900  | 2.28547300  | -0.10566500 |
| H | 2.03816200  | 2.51705600  | -0.14185100 |
| H | 0.49279600  | 3.08234500  | 0.47220700  |
| H | 0.60449200  | 2.32529700  | -1.13209700 |
| C | 1.28640300  | 0.90992500  | 1.97335100  |
| H | 2.34172700  | 1.18967300  | 2.01623100  |
| H | 1.18231500  | -0.05485800 | 2.46786700  |
| H | 0.72484200  | 1.64629100  | 2.55820000  |
| H | 2.36642800  | -0.85733000 | -2.89025500 |

### NHO 2c, TS1 ( $\nu = -983.46i$ (cm<sup>-1</sup>))

|     |             |             |             |
|-----|-------------|-------------|-------------|
| O 1 |             |             |             |
| C   | -3.51776900 | -0.07573200 | -0.08874400 |
| H   | -3.32256300 | -0.60889800 | 0.86559900  |
| O   | -2.43084600 | -0.13741400 | -0.94391800 |
| C   | 2.85236500  | -0.12975700 | -1.14118000 |
| C   | 3.28990800  | -1.15221100 | -0.10852900 |
| C   | 2.05802800  | -1.96828600 | 0.22592300  |
| H   | 4.07292000  | -1.80910000 | -0.48560000 |
| H   | 2.40051000  | -0.62680100 | -2.00323800 |
| H   | 3.66977500  | 0.49283600  | -1.49700300 |
| H   | 1.90552400  | -2.73908100 | -0.53414800 |
| H   | 2.15755400  | -2.47204100 | 1.19031800  |
| C   | 0.79233700  | 0.16708600  | 0.08744200  |
| C   | -0.41630600 | 0.92496400  | 0.40813700  |
| N   | 0.82889500  | -1.16088400 | 0.27189200  |
| N   | 1.85781400  | 0.73826800  | -0.51446600 |
| C   | 2.35356000  | 2.04458500  | -0.08118000 |
| H   | 2.31257100  | 2.77274800  | -0.89199300 |
| H   | 1.78173800  | 2.40664800  | 0.76552900  |
| H   | 3.39054600  | 1.92951500  | 0.24085300  |

|   |             |             |             |
|---|-------------|-------------|-------------|
| C | -0.33824600 | -1.96260300 | 0.62854400  |
| H | -1.25660300 | -1.44791800 | 0.36244700  |
| H | -0.28598700 | -2.89420900 | 0.06227700  |
| H | -0.32034800 | -2.20791600 | 1.69261200  |
| H | 3.67417900  | -0.63157400 | 0.77148800  |
| H | -1.32402800 | 0.34127100  | -0.24404500 |
| C | -0.55863000 | 2.32784800  | -0.17583900 |
| H | -1.62774700 | 2.53402300  | -0.27043700 |
| H | -0.13182400 | 3.12122800  | 0.44407900  |
| C | -0.82366500 | 0.89473100  | 1.88248400  |
| H | -0.78409800 | -0.10150000 | 2.32219300  |
| H | -0.18283500 | 1.54941300  | 2.48425200  |
| H | -1.84884800 | 1.25698400  | 1.98168000  |
| H | -3.75185900 | 0.96580900  | 0.20819600  |
| H | -0.12711900 | 2.40122400  | -1.17576900 |
| C | -4.77498600 | -0.68171100 | -0.70809100 |
| H | -5.62809100 | -0.62717000 | -0.02552400 |
| H | -5.03281600 | -0.15106300 | -1.62760100 |
| H | -4.60032500 | -1.73029600 | -0.96061500 |

|   |             |             |             |
|---|-------------|-------------|-------------|
| C | -3.87067600 | 0.48246300  | -0.39568200 |
| C | -4.20975200 | 0.32597200  | 1.07164000  |
| C | -2.93551400 | 0.51631000  | 1.86097000  |
| H | -4.94683200 | 1.06513900  | 1.38195600  |
| H | -3.47128800 | 1.47860200  | -0.59978700 |
| H | -4.73813400 | 0.32341200  | -1.03165300 |
| H | -2.66612300 | 1.57371500  | 1.92514700  |
| H | -3.04471000 | 0.13361400  | 2.87652600  |
| C | -1.83447400 | -0.75451800 | 0.05548600  |
| C | -0.72062900 | -1.70033900 | -0.33528100 |
| H | 0.13638600  | -1.40705800 | 0.26441800  |
| N | -1.79623300 | -0.19470100 | 1.25894500  |
| N | -2.86231500 | -0.51760400 | -0.75670400 |
| C | -3.18420600 | -1.30897400 | -1.94200200 |
| H | -4.20147800 | -1.68676000 | -1.83262600 |
| H | -3.13183600 | -0.68227300 | -2.83371500 |
| H | -2.51696800 | -2.15112100 | -2.05633600 |
| C | -0.67734100 | -0.34428500 | 2.19902800  |
| H | -0.81065500 | -1.25221100 | 2.79262300  |
| H | 0.28792600  | -0.35305000 | 1.69779900  |
| H | -0.70701800 | 0.51645100  | 2.86575800  |
| H | -4.62729200 | -0.66819000 | 1.24243000  |
| C | -1.11334100 | -3.12645700 | 0.08720200  |
| H | -1.98089600 | -3.49537000 | -0.46304600 |
| H | -0.27634800 | -3.79656800 | -0.11035500 |
| H | -1.34212300 | -3.17268300 | 1.15351500  |
| C | -0.22603000 | -1.59932000 | -1.79276200 |
| H | -0.39273700 | -2.53248300 | -2.33444900 |
| H | -0.70822700 | -0.79589400 | -2.34647500 |
| H | 0.84382700  | -1.38349500 | -1.78172900 |

### NHO 2c, TS2 ( $\nu = -200.15i$ ( $\text{cm}^{-1}$ ))

0 1

|   |             |             |             |
|---|-------------|-------------|-------------|
| C | -0.21578100 | 2.80696600  | 0.89909400  |
| C | 0.97100600  | 2.09720800  | 0.77799600  |
| C | 1.29420900  | 1.46516300  | -0.42064700 |
| C | 0.42133300  | 1.56424000  | -1.49598600 |
| C | -0.77616300 | 2.26250900  | -1.37501900 |
| C | -1.09505300 | 2.88958700  | -0.17702600 |
| H | -0.45668800 | 3.30044700  | 1.83393700  |
| H | 1.65597900  | 2.02437200  | 1.61321600  |
| H | 0.70167700  | 1.09347500  | -2.42919300 |
| H | -1.45094400 | 2.32959300  | -2.22139600 |
| H | -2.01764600 | 3.45136100  | -0.08230200 |
| C | 2.59318100  | 0.71400300  | -0.60396500 |
| O | 2.88822300  | 0.19567400  | -1.68498700 |
| O | 2.14704800  | -0.68429100 | 0.61447700  |
| C | 2.64495300  | -1.91304100 | 0.22199700  |
| H | 3.28662500  | -1.80548200 | -0.66816500 |
| H | 1.83592100  | -2.60460600 | -0.08768200 |
| C | 4.85259500  | 0.75473500  | 0.04368800  |
| H | 4.82398800  | -0.28199100 | 0.38384700  |
| H | 5.51585900  | 1.33251500  | 0.68491900  |
| O | 3.57129400  | 1.34422300  | 0.15362400  |
| H | 5.21437400  | 0.78452000  | -0.98479400 |
| C | 3.42762900  | -2.60778300 | 1.33718000  |
| H | 2.78206900  | -2.77739700 | 2.20263300  |
| H | 4.26819400  | -1.99121600 | 1.66368400  |
| H | 3.81676500  | -3.57472200 | 1.00523400  |

### NHO 2c, TS3 ( $\nu = -190.87i$ ( $\text{cm}^{-1}$ ))

0 1

|   |             |             |             |
|---|-------------|-------------|-------------|
| C | 0.25865200  | 2.99648200  | 0.05616400  |
| C | -0.79474900 | 2.28783800  | -0.51352200 |
| C | -1.34642200 | 1.19500200  | 0.14427400  |
| C | -0.82528100 | 0.80544800  | 1.37454800  |
| C | 0.23096100  | 1.50492000  | 1.94279800  |
| C | 0.76959300  | 2.60984400  | 1.28883300  |
| H | 0.67326200  | 3.85664400  | -0.45681800 |
| H | -1.20549300 | 2.57679200  | -1.47366500 |
| H | -1.25176000 | -0.05853800 | 1.86789500  |
| H | 0.63131400  | 1.19768600  | 2.90259900  |
| H | 1.57700100  | 3.17104600  | 1.74462500  |
| C | -2.52843900 | 0.47941300  | -0.48085800 |
| O | -2.79790300 | 0.63940000  | -1.67891000 |
| O | -3.54648700 | 0.44765600  | 0.46869400  |
| C | -4.71827500 | -0.22830600 | 0.03932100  |

|   |             |             |             |
|---|-------------|-------------|-------------|
| H | -4.44506500 | -1.24159700 | -0.26878000 |
| H | -5.14758600 | 0.28565800  | -0.82394000 |
| C | -2.12728100 | -2.07180900 | -1.34317800 |
| H | -2.91837400 | -2.82044100 | -1.16977300 |
| H | -1.21748600 | -2.62992300 | -1.63252700 |
| O | -1.90227000 | -1.26787000 | -0.24028000 |
| H | -2.43134600 | -1.47616900 | -2.21909900 |
| C | -5.69201700 | -0.25485900 | 1.19759000  |
| H | -5.95286700 | 0.75927100  | 1.50442500  |
| H | -5.25706700 | -0.77332500 | 2.05334400  |
| H | -6.60749300 | -0.77296700 | 0.90827900  |
| C | 3.81592200  | 0.89964900  | 0.39386100  |
| C | 4.07583600  | 0.96257100  | -1.09702500 |
| C | 2.73009600  | 0.96639600  | -1.78386200 |
| H | 4.62468300  | 1.86522500  | -1.36143100 |
| H | 3.21005200  | 1.75083000  | 0.71138900  |
| H | 4.73462200  | 0.89346600  | 0.97378200  |
| H | 2.26200500  | 1.95202500  | -1.72256700 |
| H | 2.82489000  | 0.70205100  | -2.83801700 |
| C | 2.04467800  | -0.67721400 | -0.07033400 |
| C | 1.13284000  | -1.83161700 | 0.28847300  |
| H | 0.14825700  | -1.54492400 | -0.08394500 |
| N | 1.79175900  | 0.00055200  | -1.18445600 |
| N | 3.08539800  | -0.33526700 | 0.68762200  |
| C | 3.68433000  | -1.21408200 | 1.69000500  |
| H | 4.76595700  | -1.16411000 | 1.57277100  |
| H | 3.42023700  | -0.89749700 | 2.69971600  |
| H | 3.38191200  | -2.24156600 | 1.53608500  |
| C | 0.63733800  | -0.25008700 | -2.05593300 |
| H | 0.87504400  | -1.03828500 | -2.77367700 |
| H | -0.25671000 | -0.49603000 | -1.49296700 |
| H | 0.44147800  | 0.67257400  | -2.59972100 |
| H | 4.66848700  | 0.09734700  | -1.40007300 |
| C | 1.56753800  | -3.10106100 | -0.45806700 |
| H | 2.53653000  | -3.46607700 | -0.10994900 |
| H | 0.82841600  | -3.88341500 | -0.28047900 |
| H | 1.63182800  | -2.93417900 | -1.53411900 |
| C | 0.89597100  | -2.09059800 | 1.78362400  |
| H | 1.55080700  | -2.85763200 | 2.19561200  |
| H | 1.00204700  | -1.18441200 | 2.37955600  |
| H | -0.13215100 | -2.43760900 | 1.89299900  |

### NHO 2c, TS4 ( $\nu = -1005.85i \text{ (cm}^{-1}\text{)})$

|     |             |             |             |
|-----|-------------|-------------|-------------|
| O 1 |             |             |             |
| C   | -3.82248000 | -0.59879700 | -0.45316200 |
| H   | -3.62729700 | -1.19540700 | 0.46060300  |
| H   | -4.64548100 | -1.11007800 | -0.97791300 |
| O   | -2.70068500 | -0.45225400 | -1.25424800 |

|   |             |             |             |
|---|-------------|-------------|-------------|
| C | 2.59274500  | 0.18764300  | -0.95394700 |
| C | 3.03999700  | -0.85079400 | 0.05856300  |
| C | 1.89056900  | -1.82668800 | 0.19748400  |
| H | 3.93456700  | -1.38189200 | -0.26474700 |
| H | 2.30232700  | -0.29290000 | -1.89158400 |
| H | 3.36048100  | 0.92559700  | -1.17365800 |
| H | 1.91137000  | -2.54399400 | -0.62736100 |
| H | 1.95236900  | -2.39402900 | 1.12907300  |
| C | 0.39458900  | 0.15381800  | 0.05472200  |
| C | -0.92246600 | 0.74463700  | 0.29669800  |
| N | 0.57435700  | -1.17057700 | 0.16480700  |
| N | 1.43668600  | 0.88583000  | -0.39429100 |
| C | 1.71440900  | 2.21290500  | 0.15578800  |
| H | 1.64632300  | 2.98348700  | -0.61294700 |
| H | 1.02826300  | 2.44119200  | 0.96320400  |
| H | 2.72576300  | 2.20979400  | 0.56680800  |
| C | -0.51519000 | -2.12370300 | 0.35642400  |
| H | -1.45683700 | -1.70871000 | 0.00937100  |
| H | -0.28612800 | -3.01055400 | -0.23697200 |
| H | -0.57942800 | -2.42254800 | 1.40492200  |
| H | 3.25966100  | -0.35587600 | 1.00716900  |
| H | -1.70756600 | 0.10108200  | -0.45698100 |
| C | -1.17944100 | 2.15455000  | -0.22806500 |
| H | -2.25275000 | 2.24182800  | -0.41528100 |
| H | -0.90876200 | 2.95391000  | 0.46742300  |
| C | -1.43856300 | 0.58154400  | 1.72816600  |
| H | -1.33958600 | -0.43471800 | 2.10888900  |
| H | -0.91185700 | 1.24984800  | 2.41941800  |
| H | -2.49780700 | 0.84333400  | 1.76113400  |
| H | -4.23291200 | 0.36514300  | -0.09911000 |
| H | -0.67154100 | 2.33605500  | -1.17711400 |

### Cationic ketone-type intermediates (zwitterionic mechanism): NHO1a Ketone-type cation

|     |             |             |             |
|-----|-------------|-------------|-------------|
| 1 1 |             |             |             |
| C   | 1.20523900  | 0.21806100  | -0.48145100 |
| C   | 3.17839700  | -0.71943200 | -0.07200800 |
| C   | 3.28715000  | 0.60983500  | 0.19068300  |
| N   | 2.04550600  | 1.17060300  | -0.07037900 |
| N   | 1.87595600  | -0.93433300 | -0.48997600 |
| C   | -0.23098400 | 0.36973100  | -0.81982000 |
| C   | 1.75392200  | 2.58545800  | 0.13353300  |
| C   | 1.32188000  | -2.24866200 | -0.79001100 |
| C   | 4.16779200  | -1.82406100 | 0.02458500  |
| C   | 4.43775900  | 1.42632100  | 0.65741800  |
| H   | 4.36135000  | -2.26649800 | -0.95417600 |

|   |             |             |             |
|---|-------------|-------------|-------------|
| H | 5.10821300  | -1.44432300 | 0.41703100  |
| H | 3.81071200  | -2.61119300 | 0.69083800  |
| H | 4.75091100  | 2.14118200  | -0.10578200 |
| H | 4.18452200  | 1.98130700  | 1.56204600  |
| H | 5.28166600  | 0.77824900  | 0.88200600  |
| H | 1.78880100  | 2.81088600  | 1.19775300  |
| H | 2.49540600  | 3.18026600  | -0.39466700 |
| H | 0.76856400  | 2.82198700  | -0.25118300 |
| H | 2.01975100  | -2.79178500 | -1.42243000 |
| H | 1.15495300  | -2.79091900 | 0.13896900  |
| H | 0.37912600  | -2.13678800 | -1.31644400 |
| C | -1.12483200 | -0.21037000 | 0.28273500  |
| C | -2.59608800 | -0.06380000 | 0.13664200  |
| C | -3.17432400 | 0.53192700  | -0.98407900 |
| C | -3.40962500 | -0.54452100 | 1.16452500  |
| C | -4.55450600 | 0.64567100  | -1.07449400 |
| H | -2.56240700 | 0.90725300  | -1.79437200 |
| C | -4.78551800 | -0.42679000 | 1.07307100  |
| H | -2.94632200 | -1.00464300 | 2.02768800  |
| C | -5.35833500 | 0.16866200  | -0.04725900 |
| H | -5.00125900 | 1.10653900  | -1.94571400 |
| H | -5.41510300 | -0.79678300 | 1.87188300  |
| H | -6.43502500 | 0.26046700  | -0.11845000 |
| O | -0.62160900 | -0.77281500 | 1.22725000  |
| H | -0.47957400 | 1.41649000  | -0.98371600 |
| H | -0.44920800 | -0.14126600 | -1.76121500 |

### NHO1b Ketone-type cation

1 1

|   |             |             |             |
|---|-------------|-------------|-------------|
| C | 0.96485100  | -0.73379200 | 0.07862400  |
| C | 2.67190700  | -2.15895600 | -0.45677600 |
| C | 2.89866100  | -1.59103500 | 0.94777000  |
| N | 1.63879600  | -0.87686100 | 1.20207900  |
| N | 1.53201800  | -1.36348700 | -0.93241300 |
| C | -0.30579300 | 0.02821900  | -0.04962100 |
| C | 1.42230300  | -0.19650200 | 2.46725600  |
| C | 0.93499200  | -1.64760000 | -2.22397800 |
| H | 0.36634200  | 0.01162100  | 2.61277000  |
| H | 1.75211300  | -0.85937800 | 3.26474600  |
| H | 1.99720300  | 0.72987600  | 2.50798400  |
| H | 0.14650400  | -0.93253800 | -2.44247600 |
| H | 1.70463700  | -1.56762500 | -2.98976900 |
| H | 0.51679200  | -2.65564400 | -2.22449800 |
| C | -1.49644100 | -0.93531500 | -0.10872700 |
| C | -2.85616500 | -0.34979300 | -0.21672600 |
| C | -3.06450800 | 1.02692500  | -0.29586300 |
| C | -3.94719000 | -1.22093000 | -0.24341700 |
| C | -4.35431700 | 1.52746600  | -0.40279100 |

|   |             |             |             |
|---|-------------|-------------|-------------|
| H | -2.23257700 | 1.71934000  | -0.27799500 |
| C | -5.23246700 | -0.71830500 | -0.34796500 |
| H | -3.76900000 | -2.28665600 | -0.18128200 |
| C | -5.43589400 | 0.65650100  | -0.42818300 |
| H | -4.51445300 | 2.59579800  | -0.46562700 |
| H | -6.07793000 | -1.39364000 | -0.36756300 |
| H | -6.44151900 | 1.04928400  | -0.51123200 |
| O | -1.30142000 | -2.12786700 | -0.07204900 |
| H | -0.42720900 | 0.72260300  | 0.77973300  |
| H | -0.27655000 | 0.63069900  | -0.96006800 |
| H | 3.05380500  | -2.35903900 | 1.70173300  |
| H | 3.52707800  | -2.02951900 | -1.11591500 |
| H | 2.38345500  | -3.21215600 | -0.43838700 |
| H | 3.72449900  | -0.87772700 | 0.98185000  |

### NHO1c Ketone-type cation

1 1

|   |             |             |             |
|---|-------------|-------------|-------------|
| C | -0.75570800 | 0.00004400  | 0.35758200  |
| O | -0.24307300 | 0.00023500  | 1.45296400  |
| C | 3.58192800  | 1.23540100  | 0.13033800  |
| C | 3.94261700  | 0.00012900  | 0.92547800  |
| C | 3.58195900  | -1.23534500 | 0.13063800  |
| H | 5.00885800  | 0.00016700  | 1.14449800  |
| H | 4.21870700  | 1.34572400  | -0.75082900 |
| H | 3.68645100  | 2.12877400  | 0.74203000  |
| H | 4.21877400  | -1.34589800 | -0.75047300 |
| H | 3.68645300  | -2.12856100 | 0.74256400  |
| C | 1.57414800  | -0.00006100 | -0.49060700 |
| C | 0.12948700  | -0.00013200 | -0.89308900 |
| N | 2.17933600  | -1.16097200 | -0.30296800 |
| N | 2.17928800  | 1.16091100  | -0.30318500 |
| C | 1.48326400  | 2.43286700  | -0.52704200 |
| H | 1.26382800  | 2.58019200  | -1.58399200 |
| H | 0.56596200  | 2.48257200  | 0.05808100  |
| H | 2.14029300  | 3.23206600  | -0.19958500 |
| C | 1.48337900  | -2.43299600 | -0.52664900 |
| H | 1.26392700  | -2.58046400 | -1.58357500 |
| H | 2.14046300  | -3.23212000 | -0.19911200 |
| H | 0.56609400  | -2.48268400 | 0.05850400  |
| H | 3.39665700  | 0.00023900  | 1.87057200  |
| H | -0.10419800 | -0.87112900 | -1.50233800 |
| H | -0.10421500 | 0.87068300  | -1.50258800 |
| C | -2.22872900 | 0.00001100  | 0.16816800  |
| C | -2.81336500 | -0.00018600 | -1.09803100 |
| C | -3.03719000 | 0.00018500  | 1.30693900  |
| C | -4.19537700 | -0.00020400 | -1.22297400 |
| H | -2.20500200 | -0.00032900 | -1.99381100 |
| C | -4.41504100 | 0.00016500  | 1.17891300  |

|   |             |             |             |
|---|-------------|-------------|-------------|
| H | -2.56867300 | 0.00033100  | 2.28261900  |
| C | -4.99463200 | -0.00002900 | -0.08674100 |
| H | -4.64724100 | -0.00035100 | -2.20625300 |
| H | -5.04054600 | 0.00030400  | 2.06223900  |
| H | -6.07282600 | -0.00004300 | -0.18672200 |

|   |             |             |             |
|---|-------------|-------------|-------------|
| C | 0.04470000  | 0.22738000  | -0.79928800 |
| C | 1.20042900  | 3.00896100  | -0.62101100 |
| C | 2.22522300  | -1.77873400 | 0.08373400  |
| H | 0.28439000  | 3.03879600  | -0.03474000 |
| H | 1.82727300  | 3.85392900  | -0.35366800 |
| H | 0.97462000  | 3.04546700  | -1.68472800 |
| H | 1.16097900  | -1.96212900 | 0.23106200  |
| C | -0.92867700 | 0.38263900  | 0.37682000  |
| C | -2.35672000 | 0.04709900  | 0.14874400  |
| C | -2.82598800 | -0.38262700 | -1.09257200 |
| C | -3.24301200 | 0.17671500  | 1.21990300  |
| C | -4.17118400 | -0.67974000 | -1.25991100 |
| H | -2.15559400 | -0.48676800 | -1.93614000 |
| C | -4.58374800 | -0.12182300 | 1.05009900  |
| H | -2.86430000 | 0.51285400  | 2.17653700  |
| C | -5.04794300 | -0.55012200 | -0.19060800 |
| H | -4.53378800 | -1.01251300 | -2.22366500 |
| H | -5.27047100 | -0.02204000 | 1.88062800  |
| H | -6.09710900 | -0.78295800 | -0.32307300 |
| O | -0.51572400 | 0.77907200  | 1.44192000  |
| H | -0.26322300 | 0.89703600  | -1.60630700 |
| H | -0.01000200 | -0.78356200 | -1.20324300 |
| H | 4.40174500  | -0.07032900 | 0.70311600  |
| H | 3.83244900  | 2.59332100  | 0.28088100  |
| C | 2.97635900  | -2.33707500 | 1.28157600  |
| H | 4.05613300  | -2.26653600 | 1.14482700  |
| H | 2.69486700  | -1.82217500 | 2.19992100  |
| H | 2.72480600  | -3.39196400 | 1.38374900  |
| C | 2.68713300  | -2.38242600 | -1.23480000 |
| H | 2.54868600  | -3.46295000 | -1.20586000 |
| H | 2.12102600  | -1.98152400 | -2.07640400 |
| H | 3.74622500  | -2.17231300 | -1.39455200 |

### NHO1d Ketone-type cation

1 1

|   |             |             |             |
|---|-------------|-------------|-------------|
| C | -1.84447900 | 0.09112200  | 0.39240200  |
| C | -3.80182500 | -0.74465300 | -0.18872500 |
| C | -3.84248000 | 0.59290400  | -0.39766200 |
| N | -2.61470400 | 1.09321900  | -0.03334100 |
| N | -2.55090300 | -1.03597100 | 0.30074600  |
| C | -0.42896600 | 0.19419600  | 0.81387600  |
| C | -2.20880600 | 2.49540200  | -0.11459900 |
| C | -2.05032200 | -2.36876600 | 0.62902800  |
| H | -1.29700100 | 2.57699400  | -0.70227600 |
| H | -3.00471900 | 3.04532000  | -0.60700800 |
| H | -2.05432600 | 2.89446300  | 0.88550000  |
| H | -2.83981200 | -3.08414400 | 0.42128300  |
| H | -1.18355400 | -2.59329200 | 0.01056300  |
| H | -1.78867800 | -2.41484200 | 1.68396900  |
| C | 0.50490800  | -0.12261700 | -0.36310700 |
| C | 1.96916200  | -0.03410300 | -0.13687800 |
| C | 2.50672600  | 0.31164700  | 1.10252500  |
| C | 2.81857700  | -0.31297800 | -1.20963400 |
| C | 3.88318400  | 0.37654500  | 1.26691600  |
| H | 1.86549700  | 0.53183300  | 1.94652500  |
| C | 4.19070200  | -0.24595600 | -1.04281700 |
| H | 2.38659300  | -0.58012700 | -2.16539700 |
| C | 4.72326000  | 0.09866900  | 0.19624800  |
| H | 4.29880400  | 0.64424600  | 2.22953800  |
| H | 4.84821200  | -0.46217300 | -1.87489300 |
| H | 5.79699300  | 0.15006800  | 0.32669700  |
| O | 0.02940700  | -0.43900700 | -1.42875400 |
| H | -0.22134600 | 1.19523800  | 1.19536500  |
| H | -0.22820200 | -0.50179400 | 1.63185000  |
| H | -4.54487000 | -1.50707900 | -0.34155800 |
| H | -4.62744700 | 1.22813000  | -0.76739100 |

### NHO2a Ketone-type cation

1 1

|   |             |             |             |
|---|-------------|-------------|-------------|
| C | 1.27021300  | -0.34216100 | 0.09103400  |
| C | 2.80496100  | 1.27481200  | 0.19393600  |
| C | 3.45344800  | 0.10578100  | -0.03453900 |
| N | 2.48254600  | -0.88815200 | -0.08603600 |
| N | 1.45765600  | 0.97008100  | 0.28431300  |
| C | -0.08310300 | -1.02212500 | 0.16449000  |
| C | 2.82257300  | -2.30789100 | -0.20909300 |
| C | 0.44471600  | 1.99469300  | 0.52195200  |
| C | 3.31471400  | 2.66469400  | 0.33264700  |
| C | 4.90565900  | -0.16485300 | -0.21020800 |
| H | 3.15889400  | 3.04603900  | 1.34332400  |
| H | 4.38138600  | 2.68878500  | 0.12409200  |
| H | 2.81579600  | 3.33675700  | -0.36728300 |

### NHO1e Ketone-type cation

1 1

|   |            |             |             |
|---|------------|-------------|-------------|
| C | 1.42990100 | 0.55102400  | -0.38237600 |
| C | 3.50379900 | 0.40495200  | 0.35263400  |
| C | 3.22839000 | 1.71397500  | 0.14427800  |
| N | 1.93383700 | 1.78430100  | -0.30947600 |
| N | 2.36832000 | -0.30393000 | 0.02989900  |



|   |             |             |             |
|---|-------------|-------------|-------------|
| H | 5.29746000  | -0.78948500 | 0.59424100  |
| H | 5.10530200  | -0.65899000 | -1.16191200 |
| H | 5.45135200  | 0.77546800  | -0.19794700 |
| H | 2.47260900  | -2.70837400 | -1.15545000 |
| H | 3.90247300  | -2.39391800 | -0.16736800 |
| H | 2.40143500  | -2.86388500 | 0.62355300  |
| H | -0.45140300 | 1.55513300  | 0.94896000  |
| H | 0.84484600  | 2.71020700  | 1.23507200  |
| H | 0.19755900  | 2.49408500  | -0.41357400 |
| C | -1.05864700 | -0.16966300 | -0.68776700 |
| C | -2.49558400 | 0.00039900  | -0.31074500 |
| C | -3.28703300 | -0.99451100 | 0.26446300  |
| C | -3.06564700 | 1.23943800  | -0.61268000 |
| C | -4.62562400 | -0.74775900 | 0.53427900  |
| H | -2.88939200 | -1.97775000 | 0.47159600  |
| C | -4.39589800 | 1.49110200  | -0.31787400 |
| H | -2.45210800 | 2.00171900  | -1.07694800 |
| C | -5.17837800 | 0.49551400  | 0.25489500  |
| H | -5.23768400 | -1.53121400 | 0.96190400  |
| H | -4.82390600 | 2.46018600  | -0.53977800 |
| H | -6.22045900 | 0.68659900  | 0.47837000  |
| O | -0.63102900 | 0.35717000  | -1.68851200 |
| C | -0.13278600 | -2.39235700 | -0.54770400 |
| H | 0.29829600  | -2.33251200 | -1.54607600 |
| H | 0.36187200  | -3.16778400 | 0.03144000  |
| H | -1.17492200 | -2.69125100 | -0.65891200 |
| C | -0.43457100 | -1.18448700 | 1.65500900  |
| H | -0.62822600 | -0.23011000 | 2.14460400  |
| H | -1.30300000 | -1.82290400 | 1.79128500  |
| H | 0.40456300  | -1.66142000 | 2.16439300  |

### NHO2b Ketone-type cation

1 1

|   |             |             |             |
|---|-------------|-------------|-------------|
| C | -1.74064400 | 0.01389000  | 0.09491000  |
| C | -3.06453000 | -1.86202000 | 0.21776500  |
| C | -3.94483500 | -0.62988400 | 0.05357500  |
| N | -2.96107500 | 0.43837600  | -0.19941600 |
| N | -1.74418600 | -1.26508900 | 0.44598100  |
| C | -0.46839300 | 0.84625000  | 0.13240800  |
| C | -3.47459400 | 1.80219100  | -0.32707500 |
| C | -0.62634500 | -2.16173700 | 0.68041500  |
| H | -3.12081500 | 2.27788200  | -1.23596600 |
| H | -4.55725800 | 1.72292000  | -0.38274300 |
| H | -3.21878300 | 2.40370100  | 0.54363500  |
| H | 0.25076500  | -1.62475500 | 1.03003300  |
| H | -0.92345300 | -2.86713900 | 1.45490500  |
| H | -0.37893400 | -2.70451600 | -0.23410800 |
| C | 0.58423000  | 0.06335400  | -0.69053000 |

|   |             |             |             |
|---|-------------|-------------|-------------|
| C | 2.03010400  | 0.05010500  | -0.31748300 |
| C | 2.71045000  | 1.13269300  | 0.24049500  |
| C | 2.72516900  | -1.13005700 | -0.59218500 |
| C | 4.06629900  | 1.03131100  | 0.51820100  |
| H | 2.21072300  | 2.07194600  | 0.42887400  |
| C | 4.07282200  | -1.23648700 | -0.28930700 |
| H | 2.19376300  | -1.96138400 | -1.03912500 |
| C | 4.74539500  | -0.15358200 | 0.26501600  |
| H | 4.59169300  | 1.88161200  | 0.93318400  |
| H | 4.59957300  | -2.16025400 | -0.49081500 |
| H | 5.80051500  | -0.23126400 | 0.49507800  |
| O | 0.19967600  | -0.54030700 | -1.66555900 |
| C | -0.56381900 | 2.19091900  | -0.61676100 |
| H | -0.97055700 | 2.05845300  | -1.61814100 |
| H | -1.15137200 | 2.91858700  | -0.06278600 |
| H | 0.44020200  | 2.60130900  | -0.72292200 |
| C | -0.15736500 | 1.08935600  | 1.62181800  |
| H | 0.16239400  | 0.18568900  | 2.13903100  |
| H | 0.61369500  | 1.84573600  | 1.73834700  |
| H | -1.05688000 | 1.46198200  | 2.11547700  |
| H | -3.34900100 | -2.48547700 | 1.06243800  |
| H | -4.63834300 | -0.70339800 | -0.78049900 |
| H | -4.49679500 | -0.38690700 | 0.96369800  |
| H | -3.02538100 | -2.47308800 | -0.68666400 |

### NHO2c Ketone-type cation

1 1

|   |             |             |             |
|---|-------------|-------------|-------------|
| C | 0.75881500  | -0.00957200 | -0.65159300 |
| O | 0.33688700  | -0.68262300 | -1.56218400 |
| C | -3.98866200 | 0.02841600  | -0.26022500 |
| C | -3.72378800 | -1.42551900 | -0.55042300 |
| C | -2.79973700 | -1.94000900 | 0.52737300  |
| H | -4.65884000 | -1.98249300 | -0.54596100 |
| H | -4.59988900 | 0.14220400  | 0.63884100  |
| H | -4.50460000 | 0.51912400  | -1.08652600 |
| H | -3.26917700 | -1.89731000 | 1.51350700  |
| H | -2.49887000 | -2.96836800 | 0.33488600  |
| C | -1.57326200 | 0.14512000  | 0.19643400  |
| C | -0.23442800 | 0.90563100  | 0.11053100  |
| N | -1.56860200 | -1.13281500 | 0.54815500  |
| N | -2.72612400 | 0.75919100  | -0.06317700 |
| C | -2.94407900 | 2.20636800  | 0.03671500  |
| H | -2.24012200 | 2.66593300  | 0.72027500  |
| H | -2.90277000 | 2.68869100  | -0.93846100 |
| H | -3.94081500 | 2.34210700  | 0.45349400  |
| C | -0.40370200 | -1.91232900 | 0.96462500  |
| H | 0.42884700  | -1.29032300 | 1.27138000  |
| H | -0.70741400 | -2.50358500 | 1.82773700  |

|   |             |             |             |
|---|-------------|-------------|-------------|
| H | -0.09021300 | -2.57832500 | 0.16042200  |
| H | -3.25452100 | -1.54485700 | -1.52890600 |
| C | 2.21802600  | -0.02864800 | -0.31889500 |
| C | 2.94465100  | 1.08192800  | 0.11028400  |
| C | 2.87364000  | -1.24809000 | -0.50185200 |
| C | 4.30664000  | 0.96881800  | 0.35221300  |
| H | 2.47626700  | 2.04924800  | 0.22377100  |
| C | 4.22827700  | -1.36378200 | -0.23480900 |
| H | 2.30703400  | -2.10303500 | -0.85000200 |
| C | 4.94723500  | -0.25306900 | 0.19116800  |
| H | 4.86810000  | 1.83987300  | 0.66446300  |
| H | 4.72366500  | -2.31734000 | -0.36486000 |
| H | 6.00770600  | -0.33821600 | 0.39213300  |
| C | -0.25190900 | 2.11816700  | -0.86180700 |
| H | -0.86539000 | 1.90768000  | -1.73675100 |
| H | -0.57941200 | 3.03456800  | -0.38195600 |
| H | 0.76464900  | 2.29483200  | -1.21597300 |
| C | 0.16546900  | 1.34489000  | 1.53343900  |
| H | 0.64298900  | 0.55090000  | 2.10586800  |
| H | 0.84308600  | 2.19375800  | 1.50191200  |
| H | -0.72144600 | 1.66136000  | 2.08425500  |

|   |             |             |             |
|---|-------------|-------------|-------------|
| H | 0.55917800  | 2.56483700  | 1.50893600  |
| H | -0.78984000 | 3.15945500  | 0.46803300  |
| H | 0.90517500  | -0.52867200 | -0.58947200 |
| C | 1.99575600  | 0.02842200  | 1.26558800  |
| C | 3.32997100  | -0.06932300 | 0.48872800  |
| C | 3.63185400  | -1.16102700 | -0.32471200 |
| C | 4.24642400  | 0.97113800  | 0.57677100  |
| C | 4.82624500  | -1.21163700 | -1.03247100 |
| H | 2.92900200  | -1.98489300 | -0.38609200 |
| C | 5.44337200  | 0.92842500  | -0.13233500 |
| H | 4.00449800  | 1.80743800  | 1.22089400  |
| C | 5.73655000  | -0.16311900 | -0.93990300 |
| H | 5.05181700  | -2.07022100 | -1.65416100 |
| H | 6.14969400  | 1.74648000  | -0.05175300 |
| H | 6.66815900  | -0.20041100 | -1.49138700 |
| O | 1.97470800  | 0.93405000  | 2.20353400  |
| O | 1.66799800  | -1.33662600 | 1.72663800  |
| C | 2.45408100  | -1.76033300 | 2.81801500  |
| H | 2.36168900  | -1.04532800 | 3.63993500  |
| H | 3.51332200  | -1.79755100 | 2.52831300  |
| C | 1.97892900  | -3.13509800 | 3.24350100  |
| H | 2.57574700  | -3.50376300 | 4.07964100  |
| H | 0.93424700  | -3.09682100 | 3.55916900  |
| H | 2.06362300  | -3.84609200 | 2.41921900  |

### Zwitterionic NHO-ester adducts

(zwitterionic mechanism):

#### NHO1a-Ethyl benzoate adduct

0 1

|   |             |             |             |
|---|-------------|-------------|-------------|
| C | -0.46224100 | 0.22961000  | 0.83508700  |
| C | -2.27849700 | 0.90768300  | 1.93400200  |
| C | -2.40071200 | -0.42711500 | 1.71564800  |
| N | -1.26230200 | -0.82415500 | 1.02874200  |
| N | -1.06422700 | 1.28899800  | 1.38307300  |
| C | 0.86245500  | 0.23832200  | 0.18295600  |
| C | -0.98560600 | -2.20416300 | 0.65710500  |
| C | -0.51893000 | 2.64308500  | 1.38887300  |
| C | -3.18507500 | 1.87053900  | 2.61404000  |
| C | -3.47236900 | -1.39003200 | 2.08386900  |
| H | -3.44020700 | 2.70398600  | 1.95749700  |
| H | -4.10735300 | 1.36888200  | 2.89887300  |
| H | -2.72685400 | 2.27726100  | 3.51758500  |
| H | -4.23988200 | -0.88580500 | 2.66680700  |
| H | -3.94422300 | -1.81804600 | 1.19732300  |
| H | -3.07305700 | -2.21040600 | 2.68328500  |
| H | -1.87177500 | -2.62976400 | 0.19074400  |
| H | -0.15234800 | -2.23101500 | -0.03561500 |
| H | -0.71261200 | -2.77150400 | 1.54493200  |
| H | 1.02972100  | 1.20569000  | -0.29036700 |
| H | -0.93544800 | 3.17724600  | 2.23869700  |

#### NHO1a-methyl benzoate adduct

0 1

|   |             |             |             |
|---|-------------|-------------|-------------|
| C | -1.30038500 | 0.11068700  | -0.61097800 |
| C | -3.36411500 | 0.77003700  | -0.08849400 |
| C | -3.37558400 | -0.58395400 | -0.19219300 |
| N | -2.08266400 | -0.96944300 | -0.51700900 |
| N | -2.06367900 | 1.17511900  | -0.34781700 |
| C | 0.14532300  | 0.14644900  | -0.90879100 |
| C | -1.67483800 | -2.35699900 | -0.68205200 |
| C | -1.58976800 | 2.55566900  | -0.34246700 |
| C | -4.44960100 | 1.73203400  | 0.23931600  |
| C | -4.47031100 | -1.57496600 | -0.02005400 |
| H | -4.56145300 | 2.48442400  | -0.54315300 |
| H | -5.39440000 | 1.20189500  | 0.33760000  |
| H | -4.25102200 | 2.24765100  | 1.18089800  |
| H | -5.38700300 | -1.06738600 | 0.27188900  |
| H | -4.66218000 | -2.11847300 | -0.94722200 |
| H | -4.22355400 | -2.30396800 | 0.75409200  |
| H | -2.30510600 | -2.82943900 | -1.43366300 |
| H | -0.63468500 | -2.39194500 | -0.98388800 |
| H | -1.77522000 | -2.87729900 | 0.26903900  |
| H | 0.38398300  | 1.07402900  | -1.42895800 |
| H | -2.22799800 | 3.13655300  | 0.31806600  |

|   |             |             |             |
|---|-------------|-------------|-------------|
| H | -0.57620900 | 2.55561900  | 0.05066700  |
| H | -1.63707400 | 2.97108200  | -1.34908700 |
| H | 0.41688900  | -0.68433700 | -1.55887400 |
| C | 0.97272900  | 0.11977800  | 0.43695200  |
| C | 2.46607000  | 0.12382800  | 0.03168300  |
| C | 3.06352400  | -0.96979800 | -0.59387900 |
| C | 3.23206300  | 1.25829400  | 0.26849600  |
| C | 4.40001900  | -0.92933700 | -0.97168000 |
| H | 2.47681900  | -1.86488600 | -0.76977900 |
| C | 4.57039800  | 1.30687400  | -0.11075800 |
| H | 2.75820600  | 2.09612000  | 0.76467600  |
| C | 5.15855500  | 0.21240600  | -0.73221000 |
| H | 4.85358200  | -1.78952200 | -1.45000100 |
| H | 5.15534400  | 2.19825800  | 0.08392600  |
| H | 6.20087200  | 0.24518200  | -1.02574700 |
| O | 0.62797800  | 1.06594100  | 1.26437900  |
| O | 0.66512300  | -1.24658600 | 0.91203200  |
| C | 1.18475400  | -1.49849100 | 2.19566000  |
| H | 0.79665400  | -0.78476400 | 2.92517900  |
| H | 2.28054200  | -1.44315300 | 2.20155600  |
| H | 0.88446100  | -2.50812900 | 2.47834100  |

|   |             |             |             |
|---|-------------|-------------|-------------|
| H | -4.77915300 | -2.16857000 | 0.54949900  |
| H | -5.67993400 | -0.55174600 | -1.09517600 |
| O | -0.21356700 | -0.97787100 | 1.53042300  |
| O | -0.07736900 | 1.10889000  | 0.48787300  |
| C | -0.59229200 | 1.80093900  | 1.60450400  |
| H | -0.26344400 | 1.31389800  | 2.52648100  |
| H | -1.69041600 | 1.77493600  | 1.59013100  |
| C | -0.10123000 | 3.23322300  | 1.54249600  |
| H | -0.48105100 | 3.80556600  | 2.39058300  |
| H | 0.99002500  | 3.26389300  | 1.56908700  |
| H | -0.43632800 | 3.71622500  | 0.62244800  |
| H | 0.18646200  | -1.86749800 | -0.92803200 |
| H | 0.03406200  | -0.29344800 | -1.72244100 |
| H | 4.42119900  | -0.85543000 | 1.06365500  |
| H | 4.53991600  | 0.81017200  | -1.25865000 |
| H | 3.82444400  | 1.33356100  | 0.28324600  |
| H | 4.53814200  | -1.49625000 | -0.59005000 |

### NHO1b-methyl benzoate adduct

|     |             |             |             |
|-----|-------------|-------------|-------------|
| O 1 |             |             |             |
| C   | -1.79940900 | 0.16580100  | -0.55489500 |
| C   | -3.81236000 | 0.98445200  | 0.17198800  |
| C   | -3.98060000 | -0.47615600 | -0.24856400 |
| N   | -2.59131900 | -0.89341100 | -0.45381900 |
| N   | -2.45872500 | 1.28635700  | -0.30074900 |
| C   | -0.36359600 | 0.10255000  | -0.88359300 |
| C   | -2.28133300 | -2.24577700 | -0.87660500 |
| C   | -1.90319300 | 2.60314800  | -0.05990800 |
| H   | -2.53238900 | -2.38972900 | -1.93038200 |
| H   | -1.22997900 | -2.44917400 | -0.69552600 |
| H   | -2.87476800 | -2.93204500 | -0.27384500 |
| H   | -1.88613000 | 2.80297400  | 1.01196600  |
| H   | -0.88452600 | 2.65488200  | -0.42732500 |
| H   | -2.52427600 | 3.34191200  | -0.56743100 |
| C   | 0.46798800  | -0.00906200 | 0.46847400  |
| C   | 1.95618200  | 0.07947700  | 0.05413200  |
| C   | 2.58800900  | -0.94142800 | -0.65425200 |
| C   | 2.67672100  | 1.22708500  | 0.36152600  |
| C   | 3.91542800  | -0.81683000 | -1.04561300 |
| H   | 2.03560200  | -1.84511600 | -0.88618600 |
| C   | 4.00549400  | 1.35906300  | -0.03031800 |
| H   | 2.17449200  | 2.00741900  | 0.92019800  |
| C   | 4.62860400  | 0.33719400  | -0.73606900 |
| H   | 4.39738800  | -1.62100800 | -1.58928300 |
| H   | 4.55647000  | 2.25868200  | 0.21799200  |
| H   | 5.66336800  | 0.43575600  | -1.04085100 |
| O   | 0.09383400  | 0.85265600  | 1.36532500  |
| O   | 0.21061300  | -1.41993600 | 0.82826600  |

### NHO1b-Ethyl benzoate adduct

|     |             |             |             |
|-----|-------------|-------------|-------------|
| O 1 |             |             |             |
| C   | 1.79288800  | -0.53518400 | -0.58937000 |
| C   | 3.96711100  | -0.84273200 | 0.07484600  |
| C   | 3.80259400  | 0.56649300  | -0.49634100 |
| N   | 2.45774600  | 0.50934200  | -1.07651100 |
| N   | 2.58044000  | -1.30770500 | 0.13992100  |
| C   | 0.36100500  | -0.79877100 | -0.81694000 |
| C   | 1.89482700  | 1.70976900  | -1.66121000 |
| C   | 2.26086600  | -2.62377800 | 0.66054100  |
| H   | 2.56897000  | 2.06360500  | -2.44095000 |
| H   | 0.92130600  | 1.50150700  | -2.09323500 |
| H   | 1.77405200  | 2.47763400  | -0.89503400 |
| H   | 2.78995100  | -2.75259600 | 1.60422300  |
| H   | 1.19449900  | -2.67266600 | 0.85981700  |
| H   | 2.58326300  | -3.39990400 | -0.03827400 |
| C   | -0.47922500 | -0.31130700 | 0.44850000  |
| C   | -1.96288200 | -0.34900600 | 0.00765000  |
| C   | -2.47930400 | 0.55565900  | -0.91948000 |
| C   | -2.80251900 | -1.32461400 | 0.52936100  |
| C   | -3.80953100 | 0.48756900  | -1.31320700 |
| H   | -1.83236000 | 1.32887000  | -1.32017700 |
| C   | -4.13497300 | -1.40251200 | 0.13398400  |
| H   | -2.39213400 | -2.01189000 | 1.25876300  |
| C   | -4.64249500 | -0.49611200 | -0.78841800 |
| H   | -4.20032300 | 1.20271700  | -2.02764800 |

|   |             |             |             |
|---|-------------|-------------|-------------|
| C | 0.73463100  | -1.75195200 | 2.09228500  |
| H | 0.30377000  | -1.12469100 | 2.87539800  |
| H | 1.82567700  | -1.63887900 | 2.11461000  |
| H | 0.48749000  | -2.79648500 | 2.28487700  |
| H | -0.06261200 | 1.02013100  | -1.38449700 |
| H | -0.15794700 | -0.73852400 | -1.54337800 |
| H | -4.53822600 | 1.65270000  | -0.28682100 |
| H | -4.53105200 | -0.57549500 | -1.18807100 |
| H | -4.45770900 | -1.08990200 | 0.51254900  |
| H | -3.84531400 | 1.10880600  | 1.25773900  |

|   |             |             |             |
|---|-------------|-------------|-------------|
| C | -1.82183600 | 1.66021600  | 1.75035700  |
| H | -1.67774200 | 1.28847100  | 2.76640200  |
| H | -0.88435900 | 2.02344900  | 1.33978600  |
| H | -2.53647400 | 2.47834600  | 1.78164500  |
| C | -1.48774700 | -2.72331000 | -0.35035500 |
| H | -0.55400800 | -2.46355200 | -0.84274700 |
| H | -1.31079100 | -3.29149900 | 0.56502000  |
| H | -2.08910800 | -3.33078600 | -1.02143200 |
| H | -3.71897500 | 0.30971400  | -1.49226500 |

### NHO1c-methyl benzoate adduct

#### NHO1c-Ethyl benzoate adduct

O 1

|     |             |             |             |
|-----|-------------|-------------|-------------|
| O 1 |             |             |             |
| C   | -0.21990400 | -0.51980700 | 0.84582200  |
| C   | 0.63008100  | -0.02225500 | -0.41601000 |
| C   | 2.10319100  | -0.31952100 | -0.03863500 |
| C   | 2.78714600  | 0.42226800  | 0.92285400  |
| C   | 2.75217400  | -1.38862900 | -0.64532700 |
| C   | 4.09541100  | 0.10314000  | 1.26748900  |
| H   | 2.29180200  | 1.26597200  | 1.39062100  |
| C   | 4.06058600  | -1.71490800 | -0.30225700 |
| H   | 2.21383600  | -1.95109200 | -1.39866800 |
| C   | 4.73651700  | -0.96968400 | 0.65606400  |
| H   | 4.61835200  | 0.69290000  | 2.01122700  |
| H   | 4.55489000  | -2.54924800 | -0.78627300 |
| H   | 5.75645200  | -1.21904500 | 0.92289600  |
| O   | 0.24855000  | -0.52690600 | -1.55090300 |
| O   | 0.45125100  | 1.43691600  | -0.31303800 |
| C   | 1.00147300  | 2.13920800  | -1.40659700 |
| H   | 0.49777600  | 1.84515800  | -2.33123800 |
| H   | 2.06541200  | 1.88924100  | -1.51739700 |
| C   | 0.83554800  | 3.62277100  | -1.14586900 |
| H   | 1.23291900  | 4.20517900  | -1.97892300 |
| H   | -0.22048200 | 3.87220100  | -1.02447600 |
| H   | 1.36426900  | 3.91515700  | -0.23661500 |
| H   | 0.07378700  | -1.54443600 | 1.05709100  |
| H   | 0.02793700  | 0.08288000  | 1.71500900  |
| C   | -3.81609600 | 0.72546900  | 0.60626700  |
| C   | -4.17794500 | -0.11405100 | -0.59689400 |
| C   | -3.67129300 | -1.52290000 | -0.38784800 |
| H   | -5.25799600 | -0.12094300 | -0.73517200 |
| H   | -4.38561700 | 0.41854800  | 1.48896100  |
| H   | -4.03015100 | 1.77627500  | 0.41686600  |
| H   | -4.21859400 | -2.02719600 | 0.41411100  |
| H   | -3.78921200 | -2.10927000 | -1.29716600 |
| C   | -1.67903800 | -0.46608300 | 0.55379000  |
| N   | -2.24364200 | -1.49939200 | -0.05958400 |
| N   | -2.38377600 | 0.61252900  | 0.89203600  |

|   |             |             |             |
|---|-------------|-------------|-------------|
| C | 0.69198500  | 0.25262400  | 0.52202700  |
| C | 2.17173800  | 0.14553800  | 0.07051000  |
| C | 2.69373200  | -1.03094400 | -0.46567000 |
| C | 2.99916100  | 1.25637000  | 0.17544100  |
| C | 4.01535600  | -1.09518700 | -0.88788200 |
| H | 2.05928400  | -1.90820200 | -0.53541800 |
| C | 4.32332300  | 1.20047200  | -0.25042400 |
| H | 2.58531700  | 2.15992600  | 0.60596800  |
| C | 4.83542900  | 0.02443200  | -0.78366800 |
| H | 4.40940600  | -2.01894400 | -1.29528500 |
| H | 4.95709500  | 2.07541200  | -0.16410500 |
| H | 5.86610800  | -0.02268100 | -1.11373100 |
| O | 0.42727800  | 1.28099800  | 1.26969100  |
| O | 0.34594200  | -1.04393200 | 1.13717500  |
| C | 0.89273200  | -1.18956900 | 2.42671200  |
| H | 0.50255300  | -0.43441000 | 3.11221500  |
| H | 1.98685000  | -1.11289500 | 2.40819700  |
| H | 0.61765200  | -2.18209400 | 2.78515300  |
| C | -3.64598400 | -1.25581400 | -0.27823500 |
| C | -4.17572400 | -0.08497300 | 0.51627600  |
| C | -3.76435400 | 1.19848000  | -0.16896300 |
| H | -5.26078000 | -0.14529900 | 0.58608800  |
| H | -4.18740400 | -1.37175100 | -1.22180400 |
| H | -3.75439700 | -2.18057300 | 0.28708500  |
| H | -4.24880200 | 1.29850700  | -1.14546500 |
| H | -4.03831000 | 2.06276000  | 0.43259900  |
| C | -1.62304700 | 0.10766200  | -0.56720100 |
| C | -0.15708500 | 0.18847400  | -0.82863700 |
| H | 0.15900800  | -0.66127300 | -1.42538600 |
| H | 0.07349500  | 1.09014800  | -1.39117700 |
| N | -2.31129700 | 1.22242000  | -0.34394900 |
| N | -2.21844800 | -1.08304800 | -0.56719100 |
| C | -1.50628300 | -2.30225100 | -0.96293000 |
| H | -1.26339100 | -2.28062900 | -2.02620300 |
| H | -0.60476000 | -2.42334900 | -0.36878700 |
| H | -2.16910300 | -3.14364300 | -0.78049600 |

|   |             |             |             |
|---|-------------|-------------|-------------|
| C | -1.70094400 | 2.54935100  | -0.46827900 |
| H | -0.69945800 | 2.52693700  | -0.05036500 |
| H | -1.70257600 | 2.87257900  | -1.51233700 |
| H | -2.30095400 | 3.24464600  | 0.11446400  |
| H | -3.76458700 | -0.10531100 | 1.52737800  |

### NHO1d-methyl benzoate adduct

|     |             |             |             |
|-----|-------------|-------------|-------------|
| O 1 |             |             |             |
| C   | -1.85238500 | 0.18515600  | -0.57632100 |
| C   | -3.87826400 | 0.82475200  | 0.05266500  |
| C   | -3.91177500 | -0.51212700 | -0.14767000 |
| N   | -2.64734500 | -0.89197700 | -0.54023800 |
| N   | -2.59474300 | 1.23831200  | -0.21685500 |
| C   | -0.41130000 | 0.22741800  | -0.88518200 |
| C   | -2.25790400 | -2.27240900 | -0.80384900 |
| C   | -2.10609800 | 2.61267800  | -0.12316300 |
| H   | -3.07865000 | -2.76567400 | -1.31911200 |
| H   | -1.37042200 | -2.28538100 | -1.42789300 |
| H   | -2.03502600 | -2.77213700 | 0.13534900  |
| H   | -0.16255300 | 1.19455900  | -1.32211600 |
| H   | -2.84988300 | 3.19422300  | 0.41453300  |
| H   | -1.16752900 | 2.59417300  | 0.42690600  |
| H   | -1.97464300 | 3.02592400  | -1.12231100 |
| H   | -0.15152700 | -0.55218400 | -1.60027600 |
| C   | 0.41377500  | 0.07519100  | 0.45632200  |
| C   | 1.90699800  | 0.10613200  | 0.05555100  |
| C   | 2.50767800  | -0.94399400 | -0.63751200 |
| C   | 2.66889700  | 1.22676800  | 0.36326200  |
| C   | 3.84376600  | -0.87448400 | -1.01273200 |
| H   | 1.92367200  | -1.82795300 | -0.86885600 |
| C   | 4.00614700  | 1.30471600  | -0.01414700 |
| H   | 2.19209700  | 2.02977700  | 0.91167900  |
| C   | 4.59764300  | 0.25360800  | -0.70374000 |
| H   | 4.30102600  | -1.70158300 | -1.54314400 |
| H   | 4.58797800  | 2.18478300  | 0.23407900  |
| H   | 5.63924100  | 0.30906600  | -0.99621800 |
| O   | 0.07106900  | 0.94651600  | 1.36240000  |
| O   | 0.09032700  | -1.32434200 | 0.80459100  |
| C   | 0.59441800  | -1.69598800 | 2.06549400  |
| H   | 0.21756000  | -1.03648500 | 2.84991800  |
| H   | 1.69105100  | -1.66816500 | 2.08163600  |
| H   | 0.26738300  | -2.71805600 | 2.26057100  |
| H   | -4.64438100 | 1.51303900  | 0.36231800  |
| H   | -4.71152900 | -1.22416300 | -0.04720800 |

### NHO1d-Ethyl benzoate adduct

|     |             |             |             |
|-----|-------------|-------------|-------------|
| O 1 |             |             |             |
| C   | 1.86359000  | -0.55279500 | -0.56936400 |
| C   | 3.90319000  | -0.93437800 | 0.20713400  |
| C   | 3.90723300  | 0.28336000  | -0.38110200 |
| N   | 2.63448600  | 0.50317100  | -0.85999600 |
| N   | 2.62869600  | -1.43574200 | 0.08148900  |
| C   | 0.42458700  | -0.71598800 | -0.84700700 |
| C   | 2.21310000  | 1.73658400  | -1.51428700 |
| C   | 2.17089400  | -2.73202900 | 0.57824800  |
| H   | 3.00569700  | 2.05515800  | -2.18720600 |
| H   | 1.30159600  | 1.55512900  | -2.07373200 |
| H   | 2.01471600  | 2.49606700  | -0.76219100 |
| H   | 0.19689100  | -1.77421000 | -0.97466900 |
| H   | 2.90591800  | -3.09548500 | 1.29118700  |
| H   | 1.21222500  | -2.57872500 | 1.06974500  |
| H   | 2.08848500  | -3.43536200 | -0.24940500 |
| H   | 0.15415400  | -0.19208200 | -1.76297500 |
| C   | -0.40900000 | -0.18864000 | 0.39005000  |
| C   | -1.90007200 | -0.32882600 | 0.00228300  |
| C   | -2.47777100 | 0.45367100  | -0.99670700 |
| C   | -2.68512900 | -1.27586200 | 0.64755000  |
| C   | -3.81374100 | 0.29234900  | -1.34176000 |
| H   | -1.87602900 | 1.20791400  | -1.49204800 |
| C   | -4.02355300 | -1.44449800 | 0.30481200  |
| H   | -2.22636300 | -1.86666300 | 1.43044600  |
| C   | -4.59172400 | -0.66113500 | -0.69152500 |
| H   | -4.25184500 | 0.91278300  | -2.11473500 |
| H   | -4.62423000 | -2.18569900 | 0.81888800  |
| H   | -5.63379700 | -0.78806900 | -0.95860700 |
| O   | -0.07372200 | -0.76956900 | 1.50778700  |
| O   | -0.08413400 | 1.25042200  | 0.33085600  |
| C   | -0.61950300 | 1.98369300  | 1.41093100  |
| H   | -0.29301600 | 1.54137100  | 2.35606800  |
| H   | -1.71704300 | 1.94135800  | 1.38617600  |
| C   | -0.14932800 | 3.41967200  | 1.29473000  |
| H   | -0.56908000 | 4.02547100  | 2.09964300  |
| H   | 0.93937800  | 3.47306200  | 1.35920400  |
| H   | -0.46018200 | 3.85098600  | 0.34106500  |
| H   | 4.68506900  | -1.48224000 | 0.70233100  |
| H   | 4.69138700  | 1.00933900  | -0.50269900 |

### NHO1e-Ethyl benzoate adduct

|     |            |             |             |
|-----|------------|-------------|-------------|
| O 1 |            |             |             |
| C   | 1.54110000 | 0.24673200  | -0.75111100 |
| C   | 3.65614000 | 0.31914900  | -0.10049500 |
| C   | 3.34297800 | 1.52931500  | -0.61635200 |
| N   | 2.02776400 | 1.46781300  | -1.01425800 |
| N   | 2.52466500 | -0.46268000 | -0.18747500 |
| C   | 0.15610500 | -0.19365100 | -1.00190100 |

|   |             |             |             |
|---|-------------|-------------|-------------|
| C | 1.27980900  | 2.55836500  | -1.63267900 |
| C | 2.44312200  | -1.87044600 | 0.25572200  |
| H | 1.89288100  | 3.45390400  | -1.58355900 |
| H | 1.07260300  | 2.31946400  | -2.67476600 |
| H | 0.35302000  | 2.70477600  | -1.08242400 |
| H | 0.14248300  | -1.23762700 | -1.31445200 |
| H | 1.39055900  | -2.12892800 | 0.17707700  |
| H | -0.27468000 | 0.40993900  | -1.80087800 |
| C | -0.69625800 | -0.07301300 | 0.32917900  |
| C | -2.14143300 | -0.47445900 | -0.04960800 |
| C | -2.93505800 | 0.32026800  | -0.87648200 |
| C | -2.65662300 | -1.67820000 | 0.41509200  |
| C | -4.21645500 | -0.08227300 | -1.23160700 |
| H | -2.54586000 | 1.26906300  | -1.23010700 |
| C | -3.93832600 | -2.08881300 | 0.06016400  |
| H | -2.03478400 | -2.28004600 | 1.06633100  |
| C | -4.72178000 | -1.29241600 | -0.76563100 |
| H | -4.82491000 | 0.54815100  | -1.86958900 |
| H | -4.32690300 | -3.03027100 | 0.43089500  |
| H | -5.72021600 | -1.60813800 | -1.04272400 |
| O | -0.18172700 | -0.73500300 | 1.32401700  |
| O | -0.69356900 | 1.39547000  | 0.50678600  |
| C | -1.29089400 | 1.81285600  | 1.71436900  |
| H | -0.79686800 | 1.32603900  | 2.55929600  |
| H | -2.34876400 | 1.51675800  | 1.73348400  |
| H | 4.57689300  | -0.04523600 | 0.31875700  |
| H | 3.93071000  | 2.42250100  | -0.73218500 |
| C | 2.83800700  | -1.96992500 | 1.71994200  |
| H | 2.70641900  | -2.99996700 | 2.05239600  |
| H | 3.88485500  | -1.69986600 | 1.87314700  |
| H | 2.19500200  | -1.32255500 | 2.31435700  |
| C | 3.29525700  | -2.74109400 | -0.65675600 |
| H | 4.35024500  | -2.46753600 | -0.58691100 |
| H | 3.19508000  | -3.78409200 | -0.35572600 |
| H | 2.97748900  | -2.64696900 | -1.69589600 |
| C | -1.16603700 | 3.32033000  | 1.80752100  |
| H | -1.61134500 | 3.68656400  | 2.73413500  |
| H | -0.11494000 | 3.61581600  | 1.79056100  |
| H | -1.67152300 | 3.80224100  | 0.96827500  |

|   |             |             |             |
|---|-------------|-------------|-------------|
| C | 1.35578800  | 3.00255000  | -0.80021600 |
| C | 2.28958200  | -1.81650600 | -0.15668300 |
| H | 1.99131100  | 3.82357700  | -0.48069200 |
| H | 1.17609800  | 3.07827500  | -1.87155700 |
| H | 0.41748000  | 3.02022000  | -0.25172000 |
| H | 0.01690300  | -0.67484000 | -1.45229800 |
| H | 1.22018200  | -1.98951400 | -0.24969900 |
| H | -0.31730900 | 1.05978800  | -1.47311700 |
| C | -0.74206200 | 0.04213400  | 0.45940000  |
| C | -2.20846000 | -0.19268500 | 0.02563700  |
| C | -2.95165100 | 0.80121800  | -0.61026300 |
| C | -2.80004300 | -1.42959900 | 0.24839400  |
| C | -4.25730200 | 0.56197700  | -1.01806300 |
| H | -2.50406500 | 1.77610600  | -0.77057300 |
| C | -4.10799900 | -1.67678900 | -0.15929400 |
| H | -2.21638800 | -2.18792100 | 0.75529700  |
| C | -4.84021300 | -0.68232800 | -0.79519900 |
| H | -4.82376800 | 1.34570700  | -1.50728200 |
| H | -4.55714500 | -2.64653700 | 0.02138900  |
| H | -5.85844000 | -0.87177700 | -1.11262500 |
| O | -0.24009200 | -0.87286300 | 1.23489500  |
| O | -0.68645300 | 1.41427900  | 1.02092700  |
| C | -1.27155000 | 1.49432500  | 2.29910700  |
| H | -0.79946100 | 0.79464400  | 2.99217000  |
| H | -2.34636000 | 1.27750200  | 2.26009200  |
| H | -1.13326100 | 2.51361900  | 2.66103800  |
| H | 4.52475700  | -0.18132100 | 0.32857100  |
| H | 4.00729000  | 2.50355800  | -0.03469400 |
| C | 2.72058500  | -2.32641700 | 1.20865300  |
| H | 2.52794500  | -3.39825100 | 1.26189200  |
| H | 3.78743700  | -2.16939800 | 1.38011100  |
| H | 2.14205200  | -1.82552800 | 1.98341800  |
| C | 3.05924700  | -2.45226800 | -1.30563900 |
| H | 4.13025600  | -2.25923400 | -1.21374300 |
| H | 2.90618800  | -3.53149500 | -1.28893700 |
| H | 2.71617600  | -2.06693700 | -2.26670400 |

### NHO2a-Ethyl benzoate adduct

0 1

|   |             |             |             |
|---|-------------|-------------|-------------|
| C | 1.37473100  | -0.39738600 | -0.44824900 |
| C | 3.47029900  | -0.76186900 | 0.25912500  |
| C | 3.45369500  | 0.44147300  | -0.36048700 |
| N | 2.14889500  | 0.65620900  | -0.78255800 |
| N | 2.17719600  | -1.25803000 | 0.20534700  |
| C | -0.08996500 | -0.60812700 | -0.79503200 |
| C | 1.74849000  | 1.92286200  | -1.39890000 |
| C | 1.80457100  | -2.49357200 | 0.89950900  |
| C | 4.59235200  | -1.49764100 | 0.90335100  |

### NHO1e-methyl benzoate adduct

0 1

|   |            |             |             |
|---|------------|-------------|-------------|
| C | 1.49772500 | 0.53345600  | -0.54866600 |
| C | 3.62088400 | 0.32551900  | 0.04177000  |
| C | 3.37077500 | 1.64260200  | -0.13589300 |
| N | 2.04916300 | 1.75380200  | -0.50046400 |
| N | 2.44561900 | -0.34770300 | -0.21344300 |
| C | 0.08819800 | 0.24543300  | -0.87297100 |

|   |             |             |             |   |             |             |             |
|---|-------------|-------------|-------------|---|-------------|-------------|-------------|
| C | 4.55742900  | 1.41197500  | -0.59585700 | N | -2.16391800 | -0.97317000 | -0.41343500 |
| H | 4.67338900  | -2.51413200 | 0.51571000  | N | -2.12265300 | 1.15380600  | -0.07832900 |
| H | 5.52977000  | -0.98382800 | 0.70342800  | C | 0.11721300  | 0.14370800  | -0.80878700 |
| H | 4.46606800  | -1.55546100 | 1.98619800  | C | -1.80918400 | -2.38296300 | -0.58656400 |
| H | 5.49896900  | 0.97542300  | -0.27061700 | C | -1.70060000 | 2.52649400  | 0.21153400  |
| H | 4.64813700  | 1.66362600  | -1.65359900 | C | -4.52996100 | 1.68771600  | 0.46328700  |
| H | 4.40809100  | 2.33715700  | -0.03608800 | C | -4.59894400 | -1.54958800 | -0.04842300 |
| H | 1.64044600  | 1.81063600  | -2.47505500 | H | -4.55458900 | 2.54159100  | -0.21519900 |
| H | 0.82321400  | 2.25918300  | -0.94333500 | H | -5.48776800 | 1.17645400  | 0.39908600  |
| H | 2.52929000  | 2.64849000  | -1.19544500 | H | -4.41917800 | 2.06601400  | 1.48126000  |
| H | 2.54319200  | -2.66753400 | 1.67609500  | H | -5.53078900 | -1.00221000 | 0.07396800  |
| H | 0.83285200  | -2.33359400 | 1.35557600  | H | -4.66842200 | -2.13624800 | -0.96564500 |
| H | 1.80533400  | -3.33499300 | 0.20932000  | H | -4.50428300 | -2.24008600 | 0.79182400  |
| C | -0.92480400 | -0.11824000 | 0.48277200  | H | -1.74010200 | -2.63701700 | -1.64192400 |
| C | -2.43624700 | -0.21724400 | 0.16146700  | H | -0.87363400 | -2.57374400 | -0.07371800 |
| C | -3.13929400 | 0.78905600  | -0.49987900 | H | -2.59282100 | -2.97711800 | -0.12725800 |
| C | -3.13015400 | -1.35883000 | 0.55483800  | H | -2.42536500 | 2.95290900  | 0.89879000  |
| C | -4.49724300 | 0.65477100  | -0.76845100 | H | -0.73145800 | 2.47331100  | 0.69753900  |
| H | -2.61651900 | 1.69275300  | -0.78940400 | H | -1.67660000 | 3.12076900  | -0.69991900 |
| C | -4.48489300 | -1.50522700 | 0.27925000  | C | 0.95037500  | 0.04983200  | 0.55389500  |
| H | -2.58750600 | -2.12563400 | 1.09398600  | C | 2.46316200  | 0.07318300  | 0.22402100  |
| C | -5.17435200 | -0.49733400 | -0.38570000 | C | 3.17305100  | -1.06151900 | -0.16626300 |
| H | -5.02829400 | 1.45282500  | -1.27430600 | C | 3.15070400  | 1.27908400  | 0.33087600  |
| H | -5.00660800 | -2.40307800 | 0.58956000  | C | 4.53292000  | -0.99067900 | -0.44937900 |
| H | -6.23158700 | -0.60500200 | -0.59593800 | H | 2.65524300  | -2.01093000 | -0.23035000 |
| O | -0.58064300 | -0.75976600 | 1.56965500  | C | 4.50748000  | 1.35991000  | 0.03888700  |
| O | -0.58496300 | 1.31553100  | 0.50393600  | H | 2.59934600  | 2.15067700  | 0.66175400  |
| C | -0.98682900 | 1.97614400  | 1.68358900  | C | 5.20432600  | 0.22269400  | -0.35352400 |
| H | -0.51153700 | 1.51110300  | 2.55063500  | H | 5.07109200  | -1.88542500 | -0.73985900 |
| H | -2.07329400 | 1.88749900  | 1.81676200  | H | 5.02402600  | 2.30876200  | 0.12518300  |
| C | -0.59010500 | 3.43391900  | 1.56130900  | H | 6.26329200  | 0.27912400  | -0.57475600 |
| H | -0.88050700 | 3.98805200  | 2.45550400  | O | 0.59004400  | 0.97109900  | 1.40918500  |
| H | 0.49111000  | 3.52531000  | 1.43678200  | O | 0.63405900  | -1.32426700 | 0.99403400  |
| H | -1.07471400 | 3.89430700  | 0.69773200  | C | 1.05899000  | -1.58488800 | 2.31066000  |
| C | -0.37669900 | -2.09983800 | -1.05097300 | H | 0.60617200  | -0.88612100 | 3.01636600  |
| H | -0.46142000 | -2.66763900 | -0.13044500 | H | 2.14972000  | -1.51366400 | 2.40130000  |
| H | -1.32859200 | -2.18541300 | -1.57353800 | H | 0.75363400  | -2.60321100 | 2.55526300  |
| H | 0.39193600  | -2.54737500 | -1.68601200 | C | 0.44876600  | 1.47390200  | -1.51308500 |
| C | -0.45926500 | 0.12266600  | -2.09941400 | H | 0.56977800  | 2.29367200  | -0.81288700 |
| H | -1.42045700 | -0.25490000 | -2.44473400 | H | 1.39453000  | 1.35877300  | -2.04084500 |
| H | -0.56293500 | 1.19505900  | -1.97627700 | H | -0.31517000 | 1.73337600  | -2.25007000 |
| H | 0.27408000  | -0.08157500 | -2.88435400 | C | 0.44667600  | -0.96392500 | -1.82754300 |
|   |             |             |             | H | 1.41365500  | -0.74154600 | -2.27579500 |
|   |             |             |             | H | 0.52099200  | -1.94979500 | -1.38266000 |
|   |             |             |             | H | -0.29114200 | -0.98594600 | -2.63414000 |

### NHO2a-methyl benzoate adduct

O 1

|   |             |             |             |
|---|-------------|-------------|-------------|
| C | -1.35132600 | 0.10327500  | -0.41632100 |
| C | -3.43464400 | 0.74605600  | 0.10484300  |
| C | -3.46183600 | -0.59087100 | -0.10489800 |

### NHO2b-Ethyl benzoate adduct

O 1

|   |             |             |             |     |             |             |             |
|---|-------------|-------------|-------------|-----|-------------|-------------|-------------|
| C | -1.80319600 | -0.43783000 | 0.37401000  |     |             |             |             |
| C | -3.97839600 | -0.72545500 | -0.34041900 | O 1 |             |             |             |
| C | -3.86593300 | 0.60087700  | 0.38841600  | C   | -1.81267600 | 0.13117100  | -0.35261700 |
| N | -2.51633300 | 0.53318000  | 0.96154200  | C   | -3.96257800 | 0.79098100  | 0.17307900  |
| N | -2.57654600 | -1.13084100 | -0.45778700 | C   | -3.92901800 | -0.72015700 | 0.02228300  |
| C | -0.34812300 | -0.75353900 | 0.67050500  | N   | -2.57717100 | -0.95738000 | -0.49675200 |
| C | -2.06268100 | 1.72963100  | 1.66955800  | N   | -2.54127200 | 1.13946800  | 0.11972500  |
| C | -2.28092200 | -2.28491600 | -1.29628800 | C   | -0.35117600 | 0.23213100  | -0.76129700 |
| H | -2.86586400 | 2.46020200  | 1.59130800  | C   | -2.20314900 | -2.35309100 | -0.71003300 |
| H | -1.88857600 | 1.52530700  | 2.72361300  | C   | -2.16219400 | 2.49775100  | 0.48380000  |
| H | -1.17043800 | 2.13423000  | 1.19956200  | H   | -2.08661100 | -2.57520600 | -1.76897800 |
| H | -3.00336900 | -2.27222000 | -2.11162800 | H   | -1.29695400 | -2.59026900 | -0.16187900 |
| H | -1.28287100 | -2.17526700 | -1.70521400 | H   | -3.02053300 | -2.95762500 | -0.32076300 |
| H | -2.39933800 | -3.21586900 | -0.73885000 | H   | -2.87612100 | 2.83205200  | 1.23572200  |
| C | 0.50488800  | -0.12585700 | -0.55064600 | H   | -1.16995700 | 2.47523700  | 0.92133000  |
| C | 2.00599400  | -0.19602100 | -0.17642300 | H   | -2.22031200 | 3.16825100  | -0.37525100 |
| C | 2.66180500  | 0.80665700  | 0.53671200  | C   | 0.50957000  | 0.06559800  | 0.58829500  |
| C | 2.73929900  | -1.30977800 | -0.57793600 | C   | 2.01300400  | 0.06312000  | 0.21308600  |
| C | 4.01319200  | 0.69661600  | 0.84516000  | C   | 2.69324600  | -1.08004000 | -0.20380100 |
| H | 2.10697000  | 1.68763200  | 0.83790400  | C   | 2.72219800  | 1.25748900  | 0.30754100  |
| C | 4.08718100  | -1.43339200 | -0.26010500 | C   | 4.04584900  | -1.02866700 | -0.52369600 |
| H | 2.23466900  | -2.07320800 | -1.15742100 | H   | 2.15861500  | -2.02047800 | -0.26167100 |
| C | 4.72981700  | -0.42859000 | 0.45418700  | C   | 4.07115400  | 1.31918100  | -0.02282000 |
| H | 4.50905000  | 1.49235200  | 1.38889000  | H   | 2.19619200  | 2.13560200  | 0.66138100  |
| H | 4.63976700  | -2.31050200 | -0.57626000 | C   | 4.73857600  | 0.17355200  | -0.44066100 |
| H | 5.78191000  | -0.51722800 | 0.69652800  | H   | 4.56137700  | -1.92995600 | -0.83427000 |
| O | 0.23012300  | -0.68094600 | -1.69703500 | H   | 4.60449600  | 2.25954200  | 0.05323100  |
| O | 0.09830700  | 1.28752300  | -0.45515400 | H   | 5.79158800  | 0.21479400  | -0.69194100 |
| C | 0.51700200  | 2.07558300  | -1.54854100 | O   | 0.20240800  | 0.95672500  | 1.48955200  |
| H | 0.06692900  | 1.70388800  | -2.47262700 | O   | 0.16024100  | -1.31557000 | 0.97329300  |
| H | 1.60637300  | 2.01275700  | -1.66701700 | C   | 0.59858500  | -1.64601600 | 2.27009000  |
| C | 0.09954800  | 3.50721300  | -1.27780900 | H   | 0.16166900  | -0.97932300 | 3.01566500  |
| H | 0.39624100  | 4.15645400  | -2.10323100 | H   | 1.69081400  | -1.59032200 | 2.35103500  |
| H | -0.98442100 | 3.57253200  | -1.16115200 | H   | 0.28468200  | -2.67213200 | 2.46650000  |
| H | 0.56529400  | 3.87750500  | -0.36196000 | H   | -4.48617700 | 1.28509200  | -0.64925900 |
| H | -4.43080800 | -0.63678000 | -1.32595600 | H   | -4.67303100 | -1.10069000 | -0.67454700 |
| H | -4.60750000 | 0.72726800  | 1.17435200  | H   | -4.03964800 | -1.23609200 | 0.97952900  |
| H | -3.91880200 | 1.45329600  | -0.29423100 | H   | -4.39655100 | 1.11788500  | 1.11583700  |
| H | -4.52341300 | -1.47797600 | 0.23583300  | C   | -0.01019300 | -0.80598800 | -1.84544800 |
| C | 0.06703800  | -0.20663700 | 2.04760400  | H   | 0.94853100  | -0.53726800 | -2.28502400 |
| H | 1.01067800  | -0.67005700 | 2.32893900  | H   | 0.08496500  | -1.81366100 | -1.45709000 |
| H | 0.22387800  | 0.86644900  | 2.04894900  | H   | -0.75459400 | -0.79580100 | -2.64590300 |
| H | -0.66938700 | -0.46552400 | 2.81269400  | C   | -0.06316200 | 1.61306600  | -1.38018100 |
| C | -0.12411600 | -2.27557800 | 0.72189100  | H   | -0.85652200 | 1.91454000  | -2.06835700 |
| H | -0.91793800 | -2.77795900 | 1.28022100  | H   | 0.07036500  | 2.38046600  | -0.62541400 |
| H | -0.04664400 | -2.71075500 | -0.26812500 | H   | 0.86341000  | 1.55100600  | -1.94916100 |
| H | 0.81595000  | -2.46941700 | 1.23685800  |     |             |             |             |

### NHO2c-Ethyl benzoate adduct

### NHO2b-methyl benzoate adduct



O 1  
C -0.75974300 -0.11055600 0.63454100  
C -2.21341700 -0.27611500 0.11581500  
C -2.87845700 0.70633400 -0.61607400  
C -2.89507000 -1.45499400 0.40852800  
C -4.18469300 0.51332200 -1.05159300  
H -2.36787300 1.63700700 -0.83474000  
C -4.19554500 -1.66180300 -0.03708500  
H -2.39129800 -2.20504800 1.00565300  
C -4.84626700 -0.67651400 -0.77094300  
H -4.68845500 1.29450700 -1.60892800  
H -4.70597700 -2.58898500 0.19593300  
H -5.86250700 -0.83043900 -1.11299600  
O -0.58634100 -0.64646500 1.81330400  
O -0.45062900 1.32283900 0.59162100  
C -1.02266200 2.06501900 1.64794400  
H -2.09951200 1.86645700 1.71243400  
H -0.57846900 1.76457200 2.60019400  
C 3.75163900 0.93506200 -0.89798400  
C 4.47128300 -0.36627800 -0.67479900  
C 3.94516400 -0.93194100 0.61684800  
H 3.97646500 1.35241700 -1.88026400  
H 4.03971000 1.67548700 -0.14536600  
H 4.32503300 -1.93784100 0.79732200  
H 4.23443700 -0.30704600 1.46719200  
C 1.71407000 -0.28031600 -0.20916500  
C 0.23985100 -0.68310300 -0.50138300  
N 2.48152200 -1.04303900 0.57604300  
N 2.29497200 0.74491000 -0.85164800  
C 1.62338800 1.90810000 -1.44140400  
H 1.58772600 1.82806800 -2.52830900  
H 0.64213300 2.04534100 -1.01363200  
H 2.22978400 2.77559700 -1.17726900  
C 2.00740500 -1.98156300 1.59976900  
H 0.97371000 -1.76235500 1.85170100  
H 2.16156800 -3.01052700 1.27083100  
H 2.62432500 -1.80257800 2.48241700  
C 0.12588000 -2.22577800 -0.53696800  
H -0.01840300 -2.65669900 0.44667000  
H -0.74338900 -2.49656100 -1.13320600  
H 1.00238500 -2.67822000 -1.00639300  
C -0.16261400 -0.23238200 -1.92538700  
H -0.46614200 0.80536000 -1.98925600  
H 0.64460600 -0.41400600 -2.63899800  
H -1.02016700 -0.82338600 -2.23932000  
H 4.27559600 -1.05627700 -1.49834100  
H 5.54544500 -0.20021800 -0.61052400  
C -0.77474800 3.53426100 1.36963200  
H 0.29627300 3.73431200 1.29769300

H -1.24227100 3.83085600 0.42821800  
H -1.18721000 4.15159200 2.16936400

### NHO2c-methyl benzoate adduct

O 1  
C -0.78002600 0.04758400 0.65868200  
C -2.24581200 -0.07445300 0.15876700  
C -2.92916200 0.97886600 -0.44715300  
C -2.91816200 -1.27999000 0.33844200  
C -4.24284800 0.82635800 -0.87723900  
H -2.43077900 1.93317900 -0.56484600  
C -4.22871300 -1.44304800 -0.09593500  
H -2.39615700 -2.08534100 0.84036800  
C -4.89621300 -0.38902600 -0.70935800  
H -4.75912700 1.65974500 -1.33934600  
H -4.73259200 -2.39131800 0.05074000  
H -5.91894900 -0.51019700 -1.04517300  
O -0.50434900 -0.77017200 1.63909100  
O -0.58449200 1.46337100 1.01009200  
C -1.19047600 1.81511900 2.23192700  
H -0.79553700 1.21804700 3.05555300  
H -2.27802000 1.68119400 2.19271400  
H -0.97372600 2.86971500 2.40711200  
C 3.88137000 1.05147200 -0.24612700  
C 4.44221100 -0.28936000 -0.63337100  
C 3.79572900 -1.30261300 0.27094400  
H 4.20250500 1.83226600 -0.93633000  
H 4.20560800 1.33782900 0.75900400  
H 4.05007700 -2.32159400 -0.02263000  
H 4.11522400 -1.16366600 1.30826900  
C 1.69244900 -0.08798300 -0.16337700  
C 0.19794000 -0.13746400 -0.60598600  
N 2.33230800 -1.20460900 0.20111000  
N 2.41205200 1.03563800 -0.29115300  
C 1.89790100 2.40815400 -0.34136400  
H 1.93718300 2.79920300 -1.35869400  
H 0.90264200 2.46219300 0.07397200  
H 2.56211600 3.00533300 0.28480900  
C 1.71473000 -2.42345700 0.73749400  
H 0.71790500 -2.19859000 1.09976300  
H 1.73568000 -3.22128200 -0.00635800  
H 2.32950400 -2.72466100 1.58737800  
C -0.09607900 -1.51199600 -1.25688400  
H -0.34240200 -2.27984200 -0.53268300  
H -0.95962800 -1.40744600 -1.91036200  
H 0.74440400 -1.84949000 -1.86723600  
C -0.05390500 0.88449100 -1.74055900  
H -0.22512900 1.89527100 -1.39246900

|   |             |             |             |
|---|-------------|-------------|-------------|
| H | 0.77530800  | 0.88748700  | -2.45262300 |
| H | -0.94788500 | 0.58372900  | -2.28209600 |
| H | 4.21275000  | -0.51025500 | -1.67806600 |
| H | 5.52364100  | -0.30021600 | -0.50734400 |

|   |             |            |             |
|---|-------------|------------|-------------|
| H | -4.88926100 | 3.96587600 | -1.56949500 |
| H | -5.59362100 | 4.23470800 | 0.03811400  |

### NHO 1a, TS2 ( $\nu = -181.22i$ (cm<sup>-1</sup>))

### Zwitterionic mechanism, transition states:

#### NHO 1a, TS1 ( $\nu = -388.93i$ (cm<sup>-1</sup>))

|     |             |             |             |
|-----|-------------|-------------|-------------|
| 0 1 |             |             |             |
| C   | -0.29766400 | -0.09972300 | 0.09503700  |
| C   | 1.01132600  | -0.21128400 | -0.35622000 |
| C   | 1.77777500  | 0.92877100  | -0.57321000 |
| C   | -0.08041300 | 2.29314000  | 0.12497200  |
| C   | 1.22709500  | 2.18193300  | -0.33094200 |
| C   | -0.85217400 | 1.15530500  | 0.33764500  |
| H   | 1.43621800  | -1.19145200 | -0.53699300 |
| H   | 2.79742800  | 0.84034500  | -0.92716900 |
| H   | 1.81854700  | 3.07476100  | -0.49473200 |
| H   | -7.34179500 | 3.19957600  | 1.26875500  |
| H   | -0.52007500 | 3.26286100  | 0.32367000  |
| C   | -2.27249700 | 1.33575900  | 0.82046900  |
| O   | -2.63352500 | 2.39741200  | 1.35700900  |
| O   | -2.75986800 | 0.12354100  | 1.31768900  |
| C   | -3.85095400 | 0.24177600  | 2.21635900  |
| H   | -4.25833100 | -0.76230700 | 2.33313900  |
| H   | -3.51725300 | 0.61825100  | 3.18500500  |
| H   | -4.62502200 | 0.90878300  | 1.83446600  |
| C   | -4.44860200 | 1.21924900  | -0.79333100 |
| C   | -6.44799600 | 0.39120500  | -0.18178000 |
| C   | -6.50836100 | 1.73889700  | -0.05952900 |
| N   | -5.26135200 | 2.23865100  | -0.43478000 |
| N   | -5.16891100 | 0.08286000  | -0.64383800 |
| C   | -3.07404800 | 1.29886500  | -1.07981600 |
| C   | -4.63615000 | -1.23924500 | -0.91699700 |
| C   | -4.88223300 | 3.63910000  | -0.52777800 |
| C   | -7.61731500 | 2.62756500  | 0.38007600  |
| C   | -7.46306600 | -0.65780000 | 0.10269500  |
| H   | -0.89514900 | -0.98716900 | 0.26178100  |
| H   | -7.89404000 | 3.33577400  | -0.40372800 |
| H   | -8.49511600 | 2.03220300  | 0.62227500  |
| H   | -8.38042800 | -0.19670500 | 0.46245900  |
| H   | -7.70392200 | -1.23664000 | -0.79145400 |
| H   | -7.11101200 | -1.35160400 | 0.86973500  |
| H   | -3.75476500 | -1.41580500 | -0.30037500 |
| H   | -5.39585700 | -1.98101300 | -0.68699300 |
| H   | -4.36654300 | -1.32308300 | -1.97088200 |
| H   | -2.64879200 | 0.43019700  | -1.56667500 |
| H   | -2.71795600 | 2.24910100  | -1.45773400 |
| H   | -3.89301700 | 3.76575700  | -0.09473900 |

|     |             |             |             |
|-----|-------------|-------------|-------------|
| 0 1 |             |             |             |
| C   | -1.18023000 | -0.85862900 | -0.00280100 |
| C   | -3.07292200 | -0.26683900 | -1.01789500 |
| C   | -3.40273200 | -0.95625000 | 0.10513800  |
| N   | -2.21062900 | -1.30394700 | 0.72165800  |
| N   | -1.68683600 | -0.22117600 | -1.06433800 |
| C   | 0.25025300  | -0.98434800 | 0.36836700  |
| C   | -2.10333400 | -2.06688400 | 1.96260600  |
| C   | -0.93251400 | 0.47793800  | -2.09863500 |
| C   | -3.92054900 | 0.36488000  | -2.06331000 |
| C   | -4.72741300 | -1.33028100 | 0.66708400  |
| H   | -3.77817000 | -0.11311100 | -3.03428300 |
| H   | -4.96969400 | 0.27399300  | -1.79133000 |
| H   | -3.68702200 | 1.42577300  | -2.16890500 |
| H   | -5.51767700 | -1.01138900 | -0.00868800 |
| H   | -4.80701300 | -2.41059500 | 0.79939400  |
| H   | -4.89579000 | -0.85551400 | 1.63547800  |
| H   | -2.08007200 | -3.13357500 | 1.74236200  |
| H   | -1.20572800 | -1.75154900 | 2.48686400  |
| H   | -2.96893300 | -1.84099500 | 2.57959100  |
| H   | -0.89232100 | 1.54436800  | -1.87265100 |
| H   | 0.07796400  | 0.08362300  | -2.14132500 |
| H   | -1.42111900 | 0.31534700  | -3.05616900 |
| C   | 0.63232700  | 0.19113300  | 1.30332400  |
| C   | 0.79842200  | 1.50952000  | 0.56623300  |
| C   | 1.71942900  | 1.70504200  | -0.46237400 |
| C   | -0.08991500 | 2.53347100  | 0.88196800  |
| C   | 1.74805500  | 2.90455900  | -1.15967800 |
| H   | 2.41565800  | 0.91492700  | -0.71504700 |
| C   | -0.07128500 | 3.73230100  | 0.17546400  |
| H   | -0.80073300 | 2.37434500  | 1.68392700  |
| C   | 0.84833700  | 3.91975500  | -0.84826600 |
| H   | 2.47465100  | 3.04914200  | -1.95011800 |
| H   | -0.77335200 | 4.51848700  | 0.42563000  |
| H   | 0.86871700  | 4.85248000  | -1.39851000 |
| O   | 0.14258400  | 0.20269500  | 2.44490300  |
| O   | 2.44457700  | -0.41067100 | 1.39162000  |
| C   | 3.14842600  | 0.43341300  | 2.24393700  |
| H   | 4.04713900  | -0.06507800 | 2.62799000  |
| H   | 2.53330800  | 0.71550400  | 3.11106700  |
| H   | 3.47092600  | 1.36180500  | 1.74651300  |
| H   | 0.88174100  | -1.00100900 | -0.51867800 |
| H   | 0.40918400  | -1.91042000 | 0.91815300  |
| O   | 3.35634300  | -1.27120300 | -0.87021200 |

|   |            |             |             |
|---|------------|-------------|-------------|
| H | 3.07739600 | -0.92008500 | 0.02813900  |
| C | 3.34959000 | -2.68172700 | -0.81035300 |
| H | 2.37802100 | -3.04504700 | -0.44917200 |
| H | 4.10957700 | -3.04225300 | -0.10550400 |
| C | 3.62391400 | -3.24112100 | -2.19145400 |
| H | 4.59380400 | -2.89559200 | -2.55367000 |
| H | 3.62895900 | -4.33215700 | -2.17493000 |
| H | 2.85766200 | -2.90774000 | -2.89398200 |

|   |             |             |             |
|---|-------------|-------------|-------------|
| H | -2.26860600 | -3.44551100 | 0.53673900  |
| H | -3.20902500 | -4.25115500 | -0.73194300 |
| C | -2.71737000 | -2.18009700 | -1.17217600 |
| H | -1.80110100 | -2.45447400 | -1.72542000 |
| H | -3.51361100 | -2.12015700 | -1.93202000 |
| O | -2.54615300 | -0.95356500 | -0.54516600 |
| O | -2.92226700 | -0.87831100 | 1.98267200  |
| H | -2.77874400 | -0.96894300 | 0.98022900  |
| C | -4.24949600 | -0.44967400 | 2.17133000  |
| H | -4.43940700 | -0.34397200 | 3.24104800  |
| H | -4.43730900 | 0.52158400  | 1.69539900  |
| H | -4.97299000 | -1.16758300 | 1.76676500  |
| H | -0.29695700 | -1.97333200 | 0.34628600  |
| H | -0.62692400 | -0.49904500 | 1.25189800  |

### NHO 1a, TS3 ( $v = -142.41i \text{ (cm}^{-1}\text{)}$ )

|     |             |             |             |
|-----|-------------|-------------|-------------|
| 0 1 |             |             |             |
| C   | 1.34497500  | -0.64279600 | 0.45566200  |
| C   | 3.31541700  | 0.34096100  | 0.78511200  |
| C   | 3.53728100  | -0.81861800 | 0.11209200  |
| N   | 2.29714400  | -1.40516200 | -0.08830800 |
| N   | 1.94523400  | 0.42710300  | 0.98810700  |
| C   | -0.11538900 | -0.90057500 | 0.38028100  |
| C   | 2.07616500  | -2.68108800 | -0.76390300 |
| C   | 1.28095000  | 1.55586700  | 1.63206900  |
| C   | 4.25553500  | 1.38815000  | 1.26475800  |
| C   | 4.79924300  | -1.44359700 | -0.36451500 |
| H   | 4.25878700  | 1.45057300  | 2.35451600  |
| H   | 5.26561200  | 1.15402800  | 0.93640600  |
| H   | 3.98645100  | 2.36862400  | 0.86816400  |
| H   | 4.92450800  | -2.44427400 | 0.05242800  |
| H   | 4.81587300  | -1.52339100 | -1.45296600 |
| H   | 5.64903500  | -0.83853800 | -0.05681300 |
| H   | 1.09948400  | -2.66099700 | -1.23837200 |
| H   | 2.83578500  | -2.80091100 | -1.53176700 |
| H   | 2.14898200  | -3.49795500 | -0.04688100 |
| H   | 1.09149300  | 2.34324700  | 0.90197700  |
| H   | 0.33761300  | 1.22710100  | 2.05763700  |
| H   | 1.92160200  | 1.92759100  | 2.42752200  |
| C   | -0.64417000 | -0.28701800 | -0.93735000 |
| C   | -0.97999000 | 1.18130400  | -0.87299400 |
| C   | -1.76280800 | 1.73179500  | 0.14123000  |
| C   | -0.40390000 | 2.02006400  | -1.82186200 |
| C   | -1.96526600 | 3.10275900  | 0.19953300  |
| H   | -2.21793700 | 1.08011100  | 0.87798200  |
| C   | -0.60044200 | 3.39589100  | -1.75943500 |
| H   | 0.20421200  | 1.58170800  | -2.60369600 |
| C   | -1.38070600 | 3.93952900  | -0.74774700 |
| H   | -2.58171100 | 3.52304800  | 0.98499700  |
| H   | -0.14323800 | 4.04168200  | -2.49922400 |
| H   | -1.53643800 | 5.01018400  | -0.69659800 |
| O   | -0.25459800 | -0.79192300 | -1.99040700 |
| C   | -3.06427800 | -3.30750800 | -0.19956000 |
| H   | -3.98244900 | -3.07454200 | 0.34517300  |

### NHO 1a, TS4 ( $v = -395.73i \text{ (cm}^{-1}\text{)}$ )

|     |             |             |             |
|-----|-------------|-------------|-------------|
| 0 1 |             |             |             |
| C   | -3.03444900 | 1.09261200  | -0.24310100 |
| C   | -4.34477800 | 1.19139300  | -0.69197400 |
| C   | -5.18451000 | 0.08282000  | -0.65461200 |
| C   | -4.70482400 | -1.12425800 | -0.15967100 |
| C   | -3.39482200 | -1.22155800 | 0.29339500  |
| C   | -2.54987700 | -0.11699900 | 0.25140100  |
| H   | -2.38078200 | 1.95530500  | -0.27395400 |
| H   | -4.71390200 | 2.13702500  | -1.07082700 |
| H   | -6.20560300 | 0.16107700  | -1.00680500 |
| H   | -5.35380600 | -1.99104500 | -0.12312500 |
| H   | -3.01066100 | -2.15394200 | 0.68889300  |
| C   | -1.12864000 | -0.28272200 | 0.74126400  |
| O   | -0.81868600 | -1.23936700 | 1.47473300  |
| O   | -0.56853600 | 0.97409100  | 0.98991700  |
| C   | 0.53935100  | 0.97383900  | 1.88425000  |
| H   | 0.20580600  | 0.65996200  | 2.87593500  |
| H   | 1.29653700  | 0.25861300  | 1.55417800  |
| C   | 1.01221600  | -0.52035500 | -0.91731400 |
| C   | 3.01182700  | 0.46594500  | -0.61747600 |
| C   | 3.11477700  | -0.81201300 | -0.17947200 |
| N   | 1.86858600  | -1.40915000 | -0.36413700 |
| N   | 1.70439800  | 0.63243200  | -1.07343600 |
| C   | -0.37047400 | -0.68413800 | -1.12445300 |
| C   | 1.53710900  | -2.80040300 | -0.10527800 |
| C   | 1.13429000  | 1.82367100  | -1.67507800 |
| C   | 4.01562400  | 1.56284500  | -0.65926600 |
| C   | 4.26317000  | -1.54862300 | 0.41288400  |
| H   | 3.70250800  | 2.41599400  | -0.05292600 |
| H   | 4.96690600  | 1.20594200  | -0.27011300 |
| H   | 4.17885100  | 1.91583300  | -1.67972700 |
| H   | 5.14243100  | -0.90812900 | 0.43550100  |

|   |             |             |             |
|---|-------------|-------------|-------------|
| H | 4.04812200  | -1.86421300 | 1.43630800  |
| H | 4.50817400  | -2.43924400 | -0.16946300 |
| H | 2.23728000  | -3.20020000 | 0.62372800  |
| H | 0.53401000  | -2.84979800 | 0.30886000  |
| H | 1.60156300  | -3.38491700 | -1.02511800 |
| H | -0.81963300 | 0.02850000  | -1.80528700 |
| H | -0.72068400 | -1.70124000 | -1.24690800 |
| H | 0.89301100  | 1.63790600  | -2.72300300 |
| H | 0.23180600  | 2.10671500  | -1.13459500 |
| H | 1.85815900  | 2.63220400  | -1.61487800 |
| C | 1.10565900  | 2.37597300  | 1.91728000  |
| H | 0.35583300  | 3.09039100  | 2.26056500  |
| H | 1.95856700  | 2.41683800  | 2.59674800  |
| H | 1.44250100  | 2.68148300  | 0.92516200  |

**NHO 1b, TS1 ( $\nu = -414.62i$  (cm<sup>-1</sup>))**

|     |             |             |             |
|-----|-------------|-------------|-------------|
| 0 1 |             |             |             |
| C   | 2.59300900  | -1.14016600 | -0.17829400 |
| C   | 3.89600000  | -1.18758700 | -0.65628500 |
| C   | 4.66228900  | -0.02805200 | -0.71745700 |
| C   | 2.81384800  | 1.22343100  | 0.18697200  |
| C   | 4.11728300  | 1.17788700  | -0.29390400 |
| C   | 2.04381500  | 0.06746600  | 0.24650000  |
| H   | 4.31606500  | -2.13174600 | -0.98181800 |
| H   | 5.67830600  | -0.06633000 | -1.09046700 |
| H   | 4.70974900  | 2.08415900  | -0.33264600 |
| H   | 2.37855000  | 2.15392500  | 0.53025500  |
| C   | 0.61858800  | 0.17589300  | 0.76677000  |
| O   | 0.27843100  | 1.17726300  | 1.43114900  |
| O   | 0.21373900  | -1.10109200 | 1.21624000  |
| C   | -0.82642000 | -1.07318100 | 2.17443300  |
| H   | -1.11929000 | -2.10903100 | 2.34278000  |
| H   | -0.48690300 | -0.63279200 | 3.11341500  |
| H   | -1.68466000 | -0.49750000 | 1.82221500  |
| C   | -1.61580000 | 0.16323000  | -0.73614400 |
| C   | -3.66783900 | -0.73855300 | -0.19350500 |
| C   | -3.77852400 | 0.78337900  | -0.23966000 |
| N   | -2.37281200 | 1.17910100  | -0.28242200 |
| N   | -2.36234900 | -0.96117600 | -0.80891900 |
| C   | -0.23186100 | 0.25384800  | -0.98824400 |
| C   | -1.84384600 | -2.30834400 | -0.90650100 |
| C   | -1.99899800 | 2.57491500  | -0.38400700 |
| H   | 1.99585100  | -2.04250200 | -0.13347400 |
| H   | -1.63297500 | -2.72403700 | 0.08226000  |
| H   | -2.58631100 | -2.93011000 | -1.40656400 |
| H   | -0.93000000 | -2.31815700 | -1.49469800 |
| H   | -0.96277000 | 2.68986500  | -0.07732000 |
| H   | -2.14534200 | 2.95552000  | -1.40013800 |

|   |             |             |             |
|---|-------------|-------------|-------------|
| H | -2.62398600 | 3.14660300  | 0.30071100  |
| H | 0.11069300  | 1.22467000  | -1.32411500 |
| H | 0.18823100  | -0.57171400 | -1.54651200 |
| H | -4.29416400 | 1.12549000  | -1.14352000 |
| H | -4.45224500 | -1.24409300 | -0.75409200 |
| H | -4.27303000 | 1.20377100  | 0.63427700  |
| H | -3.66625300 | -1.11583600 | 0.83569000  |

**NHO 1b, TS2 ( $\nu = -170.84i$  (cm<sup>-1</sup>))**

|     |             |             |             |
|-----|-------------|-------------|-------------|
| 0 1 |             |             |             |
| C   | -0.95374800 | -1.43132600 | 0.17278900  |
| C   | -2.51622400 | -1.93204300 | -1.43251700 |
| C   | -3.13628300 | -2.11310800 | -0.04461500 |
| N   | -2.09214700 | -1.57807400 | 0.83320300  |
| N   | -1.10377300 | -1.69455100 | -1.11657900 |
| C   | 0.31485200  | -0.98258500 | 0.79743700  |
| C   | -2.27399500 | -1.58922500 | 2.27324700  |
| C   | -0.15032800 | -1.54734200 | -2.20059000 |
| H   | -1.42796700 | -1.10564100 | 2.75336000  |
| H   | -3.17723000 | -1.02892700 | 2.51446400  |
| H   | -2.38824000 | -2.61817500 | 2.62222800  |
| H   | 0.85404800  | -1.37463500 | -1.82168600 |
| H   | -0.15915600 | -2.46053300 | -2.79600000 |
| H   | -0.44164400 | -0.70458000 | -2.83107900 |
| C   | 0.20956200  | 0.49685100  | 1.29355300  |
| C   | -0.34733900 | 1.45382200  | 0.24803400  |
| C   | 0.14502900  | 1.52416500  | -1.05381700 |
| C   | -1.42551700 | 2.25598800  | 0.60699700  |
| C   | -0.43480900 | 2.38112100  | -1.97971000 |
| H   | 1.00290200  | 0.92659200  | -1.33798400 |
| C   | -2.00807300 | 3.11618000  | -0.31822500 |
| H   | -1.79601800 | 2.19562700  | 1.62284700  |
| C   | -1.51490600 | 3.17954100  | -1.61471200 |
| H   | -0.03728400 | 2.43500200  | -2.98628300 |
| H   | -2.84721800 | 3.73602600  | -0.02599700 |
| H   | -1.96360700 | 3.85053400  | -2.33703100 |
| O   | -0.10979900 | 0.68020800  | 2.48427700  |
| C   | 2.32284200  | 2.07576500  | 1.52829600  |
| H   | 3.39067600  | 2.15873000  | 1.76110600  |
| H   | 2.08069300  | 2.84503600  | 0.77897300  |
| H   | 1.76284300  | 2.30905400  | 2.44434900  |
| O   | 2.02371400  | 0.79031900  | 1.08088700  |
| H   | 2.69573100  | 0.23878300  | -0.28293800 |
| C   | 3.71037400  | -2.20409300 | 0.08378800  |
| H   | 2.95567400  | -2.80931400 | -0.42415900 |
| H   | 3.29087000  | -1.84767400 | 1.02686000  |
| H   | 4.57088600  | -2.83868500 | 0.30578300  |
| C   | 4.11785500  | -1.02659700 | -0.78783700 |

|   |             |             |             |
|---|-------------|-------------|-------------|
| H | 4.89368400  | -0.44130400 | -0.27967700 |
| H | 4.54651800  | -1.38559500 | -1.72643000 |
| O | 3.01811200  | -0.20074100 | -1.12170300 |
| H | 1.12507900  | -1.09058100 | 0.08563900  |
| H | 0.53437200  | -1.59179500 | 1.67425900  |
| H | -3.30901700 | -3.16346400 | 0.20211400  |
| H | -2.62035500 | -2.80884900 | -2.06864900 |
| H | -4.06401200 | -1.55952900 | 0.08539600  |
| H | -2.91274300 | -1.05870500 | -1.95622000 |

|   |             |             |             |
|---|-------------|-------------|-------------|
| H | -2.54279300 | 0.16240500  | 1.15306400  |
| C | -3.15901000 | -1.40487600 | 2.19219900  |
| H | -2.91199200 | -1.86610000 | 3.15013600  |
| H | -4.24767300 | -1.29442600 | 2.13794800  |
| H | -2.84977900 | -2.08946200 | 1.39223500  |
| H | -0.85027300 | -1.87319900 | -0.84891100 |
| H | -0.93027000 | -1.01016800 | 0.69481500  |
| H | 3.42442200  | -2.19321500 | 1.82475400  |
| H | 3.40321100  | -3.04886100 | -0.41552200 |
| H | 4.00094700  | -1.44716300 | -0.89784800 |
| H | 3.52337400  | -0.51282400 | 1.25300000  |

### NHO 1b, TS3 ( $\nu = -139.98i \text{ (cm}^{-1}\text{)}$ )

0 1

|   |             |             |             |
|---|-------------|-------------|-------------|
| C | 1.02824300  | -1.38293200 | 0.01033300  |
| C | 3.05368900  | -1.48509100 | 1.08629800  |
| C | 3.21819100  | -1.97385200 | -0.35559300 |
| N | 1.90548200  | -1.67823300 | -0.93567500 |
| N | 1.59895200  | -1.33539500 | 1.20419800  |
| C | -0.40332500 | -1.08175600 | -0.24817900 |
| C | 1.63262700  | -2.00442600 | -2.32288200 |
| C | 1.02206300  | -0.96917000 | 2.48409500  |
| H | 0.60877200  | -1.74121800 | -2.57102600 |
| H | 2.30288100  | -1.42734500 | -2.96042800 |
| H | 1.81061200  | -3.06938900 | -2.48698700 |
| H | -0.06193200 | -0.90959900 | 2.42477300  |
| H | 1.30115200  | -1.72610800 | 3.21762100  |
| H | 1.41515100  | -0.00071500 | 2.80016100  |
| C | -0.54284300 | 0.24413500  | -1.05834700 |
| C | 0.18000300  | 1.42092600  | -0.43864600 |
| C | 0.05481100  | 1.75371300  | 0.90894400  |
| C | 1.05075800  | 2.15072400  | -1.24114500 |
| C | 0.78966700  | 2.80380700  | 1.44160200  |
| H | -0.64065100 | 1.20743600  | 1.53521500  |
| C | 1.78675400  | 3.20437700  | -0.70913900 |
| H | 1.13997700  | 1.88148500  | -2.28651900 |
| C | 1.65918000  | 3.53181700  | 0.63424000  |
| H | 0.67849700  | 3.06192300  | 2.48804300  |
| H | 2.46014000  | 3.76807200  | -1.34351100 |
| H | 2.23051000  | 4.35165800  | 1.05214500  |
| O | -0.62153400 | 0.15898500  | -2.29000400 |
| C | -3.96626600 | -0.82161000 | -1.31504600 |
| H | -4.47552900 | -0.98102800 | -0.36179100 |
| H | -3.23430500 | -1.62236500 | -1.44738800 |
| H | -4.70595800 | -0.89695500 | -2.11665400 |
| C | -3.26552900 | 0.53466300  | -1.33121400 |
| H | -2.79047100 | 0.67114200  | -2.31491700 |
| H | -4.01734300 | 1.33192500  | -1.23292100 |
| O | -2.30806600 | 0.66098000  | -0.33363000 |
| O | -2.49612500 | -0.16411700 | 2.10559900  |

### NHO 1b, TS4 ( $\nu = -411.87i \text{ (cm}^{-1}\text{)}$ )

0 1

|   |             |             |             |
|---|-------------|-------------|-------------|
| C | -2.92494300 | 1.24117600  | -0.05565800 |
| C | -4.24855000 | 1.34638100  | -0.46382400 |
| C | -5.10996400 | 0.26235100  | -0.33199800 |
| C | -3.31609300 | -1.02768900 | 0.62713600  |
| C | -4.63950200 | -0.92561700 | 0.21480900  |
| C | -2.45066900 | 0.05221100  | 0.49366000  |
| H | -4.61064500 | 2.27732500  | -0.88364400 |
| H | -6.14135600 | 0.34458200  | -0.65206500 |
| H | -5.30631900 | -1.77256100 | 0.32348600  |
| H | -2.93701300 | -1.94382100 | 1.06348800  |
| C | -1.00709500 | -0.12361800 | 0.94378800  |
| O | -0.72546100 | -1.02978800 | 1.76032600  |
| O | -0.44211400 | 1.15628500  | 1.13231000  |
| C | 0.67382000  | 1.18643700  | 2.00916600  |
| H | 0.34401400  | 0.98299200  | 3.03127900  |
| H | 1.38702500  | 0.40174700  | 1.74210000  |
| C | 1.10182100  | -0.46958900 | -0.69493900 |
| C | 3.18606800  | 0.50340600  | -0.89076600 |
| C | 3.29091500  | -0.75567100 | -0.03161300 |
| N | 1.98512600  | -1.37774500 | -0.23684400 |
| N | 1.73973300  | 0.68348700  | -0.97227500 |
| C | -0.29809800 | -0.62933200 | -0.78872200 |
| C | 1.15148500  | 1.76737200  | -1.72952100 |
| C | 1.66055700  | -2.58757900 | 0.48959800  |
| H | -2.25350300 | 2.08459900  | -0.15759900 |
| H | 0.20111000  | 2.05170500  | -1.27933600 |
| H | 1.82476100  | 2.62189000  | -1.67983700 |
| H | 1.00073100  | 1.49583200  | -2.77877900 |
| H | 0.63015800  | -2.87146800 | 0.29911100  |
| H | 2.33053000  | -3.38662700 | 0.16971100  |
| H | 1.77268700  | -2.42586600 | 1.56436700  |
| C | 1.31124800  | 2.55398900  | 1.90218400  |
| H | 2.16700200  | 2.62313200  | 2.57570800  |
| H | 1.65527600  | 2.73652000  | 0.88264900  |

|   |             |             |             |
|---|-------------|-------------|-------------|
| H | 0.59792800  | 3.33477500  | 2.17075000  |
| H | -0.65141500 | -1.65097200 | -0.83882300 |
| H | -0.76406100 | 0.02475100  | -1.51555400 |
| H | 4.09281000  | -1.42294200 | -0.34344700 |
| H | 3.60707400  | 0.35094400  | -1.88974100 |
| H | 3.42318800  | -0.51538500 | 1.02983700  |
| H | 3.65976500  | 1.37094200  | -0.43291700 |

|   |             |            |             |
|---|-------------|------------|-------------|
| H | -0.99371700 | 2.99218100 | -1.38245900 |
| H | -1.70001400 | 3.39993300 | 0.19160800  |
| H | -3.36190300 | 0.26608300 | 1.57271300  |

### NHO 1c, TS2 ( $v = -181.94i$ (cm<sup>-1</sup>))

0 1

|   |             |             |             |
|---|-------------|-------------|-------------|
| C | 0.00836000  | 1.18371500  | 1.18833200  |
| C | -0.57516200 | 1.39597000  | -0.20117300 |
| C | 0.00772800  | 0.87257800  | -1.35491700 |
| C | -1.78759500 | 2.06919500  | -0.30220200 |
| C | -0.62042700 | 1.01233500  | -2.58497100 |
| H | 0.96982600  | 0.37880000  | -1.29021200 |
| C | -2.41973300 | 2.21151300  | -1.53407500 |
| H | -2.22590100 | 2.48118500  | 0.59859200  |
| C | -1.83970500 | 1.67859900  | -2.67759800 |
| H | -0.15556600 | 0.60807900  | -3.47627400 |
| H | -3.36440200 | 2.73779300  | -1.59916600 |
| H | -2.32847200 | 1.78689200  | -3.63819600 |
| O | -0.40170700 | 1.88947900  | 2.11891600  |
| O | 1.82807800  | 1.64933100  | 0.83330900  |
| C | 1.89041400  | 3.02450000  | 0.63240800  |
| H | 2.90704300  | 3.39800600  | 0.80749700  |
| H | 1.22193800  | 3.54976500  | 1.32973700  |
| H | 1.60107200  | 3.31306100  | -0.39074700 |
| O | 3.23120200  | 0.11423300  | -0.67696900 |
| H | 2.70935200  | 0.77195300  | -0.11676000 |
| C | 4.10769000  | -0.59030200 | 0.17571100  |
| H | 3.55591800  | -1.04032800 | 1.01395000  |
| H | 4.85003500  | 0.08849300  | 0.61373800  |
| C | 4.80705900  | -1.67836100 | -0.61377900 |
| H | 5.36922700  | -1.24165200 | -1.44097900 |
| H | 5.49845800  | -2.23557600 | 0.02036300  |
| H | 4.07777900  | -2.37773000 | -1.02852300 |
| C | -1.29113600 | -2.62270300 | -1.01148600 |
| C | -2.61878200 | -1.90966300 | -0.89486300 |
| C | -2.98963000 | -1.83353100 | 0.57097900  |
| H | -0.87264900 | -2.50437200 | -2.01290700 |
| H | -1.39221000 | -3.69171700 | -0.80694400 |
| H | -3.90754300 | -1.26659700 | 0.71919500  |
| H | -3.12738400 | -2.82886500 | 1.00294300  |
| C | -0.66471200 | -1.22473200 | 0.90880600  |
| C | 0.37100800  | -0.31274800 | 1.49831500  |
| N | -1.92771500 | -1.13120400 | 1.29597400  |
| N | -0.31629100 | -2.04606700 | -0.07730000 |
| C | 1.07901100  | -2.40378800 | -0.34968500 |
| H | 1.60306300  | -1.62733000 | -0.90932800 |
| H | 1.61135100  | -2.60343000 | 0.57789800  |
| H | 1.06455400  | -3.32271600 | -0.93220900 |

### NHO 1c, TS1 ( $v = -405.45i$ (cm<sup>-1</sup>))

0 1

|   |             |             |             |
|---|-------------|-------------|-------------|
| C | 2.85130700  | -1.10671400 | -0.33830000 |
| C | 4.16142600  | -0.96343500 | -0.77820300 |
| C | 4.83352200  | 0.24068800  | -0.59812900 |
| C | 2.87788200  | 1.15501000  | 0.46969600  |
| C | 4.18731400  | 1.30032100  | 0.02793200  |
| C | 2.20114800  | -0.04626800 | 0.28863000  |
| H | 4.66043000  | -1.79443000 | -1.26230200 |
| H | 5.85419400  | 0.35118300  | -0.94291500 |
| H | 4.70532000  | 2.24021700  | 0.17629700  |
| H | 2.36343200  | 1.96877500  | 0.96626300  |
| C | 0.76406300  | -0.13906300 | 0.77275200  |
| O | 0.33542500  | 0.69606800  | 1.59460400  |
| O | 0.44091600  | -1.50010900 | 0.96692900  |
| C | -0.60008700 | -1.73199600 | 1.89684300  |
| H | -0.29352600 | -1.46675300 | 2.90993700  |
| H | -1.49683100 | -1.16104300 | 1.65131500  |
| H | -0.82066400 | -2.79784900 | 1.84874600  |
| H | 2.32832400  | -2.04422900 | -0.48002000 |
| C | -3.55105300 | -0.93018100 | -0.21330100 |
| C | -3.87176000 | 0.30211300  | 0.60795300  |
| C | -3.39439400 | 1.52706600  | -0.14630500 |
| H | -4.94457400 | 0.35029500  | 0.79080000  |
| H | -4.30166500 | -1.07661900 | -0.99530400 |
| H | -3.55496100 | -1.82259500 | 0.41952600  |
| H | -3.91098400 | 1.61332000  | -1.10988500 |
| H | -3.58694200 | 2.43411600  | 0.42250700  |
| C | -1.43106300 | 0.24927300  | -0.76561800 |
| C | -0.03672900 | 0.14832300  | -1.01788100 |
| H | 0.29165500  | -0.73368700 | -1.54614700 |
| H | 0.44318500  | 1.05480500  | -1.35993900 |
| N | -1.95615600 | 1.41556700  | -0.34726000 |
| N | -2.23505600 | -0.83440300 | -0.84852100 |
| C | -1.74134200 | -2.08301500 | -1.41585100 |
| H | -1.27805800 | -1.90685500 | -2.38572500 |
| H | -1.02039400 | -2.56750100 | -0.75399700 |
| H | -2.59481800 | -2.74251700 | -1.56133900 |
| C | -1.15889100 | 2.63565200  | -0.36116400 |
| H | -0.20778400 | 2.46071800  | 0.13419100  |

|   |             |             |             |
|---|-------------|-------------|-------------|
| C | -2.38652900 | -0.32133400 | 2.42129500  |
| H | -3.08177100 | -0.92909600 | 3.00093000  |
| H | -1.56060300 | -0.00988800 | 3.04795400  |
| H | -2.89981600 | 0.56885900  | 2.05465700  |
| H | 1.33948600  | -0.53629100 | 1.06894600  |
| H | 0.43573000  | -0.41278200 | 2.58038000  |
| H | -2.53717500 | -0.89656100 | -1.29917600 |
| H | -3.38103300 | -2.44884800 | -1.45470500 |

|   |             |             |             |
|---|-------------|-------------|-------------|
| C | -0.11750000 | 1.27683300  | -0.02290800 |
| C | -0.19923400 | 0.79784800  | 1.28428500  |
| C | 0.54062800  | 2.47814800  | -0.26309100 |
| C | 0.37759900  | 1.50582500  | 2.32925800  |
| H | -0.74164300 | -0.11752200 | 1.48795200  |
| C | 1.12120600  | 3.18951000  | 0.78282500  |
| H | 0.58992200  | 2.84719300  | -1.28038900 |
| C | 1.04598600  | 2.70195200  | 2.08058300  |
| H | 0.30075000  | 1.12808400  | 3.34179400  |
| H | 1.63221900  | 4.12348700  | 0.58269200  |
| H | 1.49866200  | 3.25189200  | 2.89663600  |
| H | 4.39266100  | -0.35058500 | 1.16341100  |
| H | 2.85146100  | 0.50935900  | 0.99079600  |

### NHO 1c, TS3 ( $\nu = -149.60i \text{ (cm}^{-1}\text{)}$ )

0 1

|   |             |             |             |
|---|-------------|-------------|-------------|
| C | -0.63421200 | 0.49741200  | -1.22065600 |
| O | -0.76723800 | 1.07905900  | -2.30059000 |
| C | -4.65152800 | 0.95828000  | -0.49234300 |
| H | -4.93335800 | 0.31082400  | 0.34142200  |
| H | -4.91871700 | 0.45242900  | -1.42238600 |
| H | -5.22964800 | 1.88295300  | -0.42111300 |
| C | -3.15470900 | 1.24329900  | -0.45932800 |
| H | -2.89441700 | 1.90639800  | -1.29914200 |
| H | -2.91504400 | 1.79522700  | 0.46631400  |
| O | -2.41633900 | 0.06779700  | -0.54653300 |
| O | -2.62222600 | -1.52486600 | 1.43048500  |
| H | -2.56965200 | -0.84905500 | 0.67354500  |
| C | -3.21267400 | -2.68899000 | 0.90276500  |
| H | -3.32787100 | -3.42269500 | 1.70260100  |
| H | -4.20265600 | -2.48871700 | 0.47736100  |
| H | -2.59588300 | -3.14254700 | 0.11499500  |
| C | 2.66846100  | -1.62388400 | 1.16333300  |
| C | 3.40681400  | -0.38803100 | 0.70295800  |
| C | 3.52669300  | -0.43965600 | -0.80523800 |
| H | 2.36759500  | -1.53106400 | 2.20863300  |
| H | 3.28774500  | -2.51937200 | 1.06492700  |
| H | 3.98234800  | 0.46875000  | -1.19685800 |
| H | 4.12629900  | -1.29413900 | -1.13149900 |
| C | 1.20403500  | -1.14948700 | -0.74886400 |
| C | -0.20989200 | -1.01270900 | -1.23498400 |
| N | 2.18616300  | -0.53353800 | -1.38983700 |
| N | 1.43734300  | -1.80297700 | 0.38486000  |
| C | 0.46965000  | -2.73770300 | 0.96764700  |
| H | -0.32500700 | -2.22516700 | 1.51198000  |
| H | 0.03274000  | -3.36509700 | 0.19412800  |
| H | 1.02118100  | -3.38066300 | 1.65033800  |
| C | 2.03545100  | 0.13410500  | -2.67976500 |
| H | 1.12291800  | -0.16785000 | -3.17803000 |
| H | 2.01545000  | 1.21588500  | -2.54000500 |
| H | 2.89620400  | -0.13809900 | -3.29062100 |
| H | -0.32606800 | -1.37128800 | -2.25625900 |
| H | -0.87549000 | -1.57401000 | -0.59050300 |

### NHO 1c, TS4 ( $\nu = -449.81i \text{ (cm}^{-1}\text{)}$ )

0 1

|   |             |             |             |
|---|-------------|-------------|-------------|
| C | 2.79009300  | -1.26466200 | -0.28738500 |
| C | 4.07107000  | -1.31542000 | -0.82277200 |
| C | 4.86757900  | -0.17541500 | -0.84445800 |
| C | 3.09608400  | 1.06348500  | 0.21740200  |
| C | 4.37553900  | 1.01526500  | -0.32228200 |
| C | 2.29437500  | -0.07307900 | 0.23645300  |
| H | 4.45093900  | -2.24829200 | -1.22212300 |
| H | 5.86589100  | -0.21676400 | -1.26228400 |
| H | 4.99146100  | 1.90663000  | -0.33089700 |
| H | 2.70267900  | 1.98149600  | 0.63678200  |
| C | 0.89806600  | 0.04199100  | 0.82563400  |
| O | 0.64407100  | 0.96656400  | 1.62760400  |
| O | 0.42097000  | -1.25094000 | 1.11338300  |
| C | -0.60071200 | -1.29900400 | 2.10118300  |
| H | -0.16244800 | -1.12245900 | 3.08756500  |
| H | -1.32653200 | -0.50450000 | 1.92323800  |
| H | 2.17118500  | -2.15303600 | -0.27042700 |
| C | -3.42841600 | -1.10549800 | -0.69585700 |
| C | -3.95853600 | -0.21515100 | 0.40512400  |
| C | -3.53501400 | 1.21164200  | 0.13365900  |
| H | -5.04547300 | -0.27852900 | 0.44561000  |
| H | -3.93377700 | -0.89145300 | -1.64493400 |
| H | -3.60563000 | -2.15373700 | -0.45538700 |
| H | -4.06378600 | 1.61068500  | -0.74026200 |
| H | -3.77513200 | 1.84784000  | 0.98520900  |
| C | -1.39090300 | 0.27654500  | -0.63876300 |
| C | 0.00107200  | 0.42623900  | -0.88947800 |
| H | 0.42022200  | -0.27794300 | -1.59224300 |
| H | 0.34712700  | 1.43645100  | -1.05369500 |
| N | -2.09329100 | 1.28743400  | -0.08461500 |
| N | -1.98771400 | -0.92007300 | -0.84648500 |
| C | -1.27472400 | -1.97603800 | -1.55601300 |

|   |             |             |             |
|---|-------------|-------------|-------------|
| H | -1.07566600 | -1.69820900 | -2.59464900 |
| H | -0.33811600 | -2.20641000 | -1.05238200 |
| H | -1.89897100 | -2.86684500 | -1.54961700 |
| C | -1.50779500 | 2.62391300  | -0.00657100 |
| H | -0.54049200 | 2.57959500  | 0.48615400  |
| H | -1.40892300 | 3.07032600  | -1.00059200 |
| H | -2.17237400 | 3.24571300  | 0.58900800  |
| H | -3.56241700 | -0.54671800 | 1.36728100  |
| C | -1.25244300 | -2.66267600 | 2.03618800  |
| H | -2.02093500 | -2.74873400 | 2.80639400  |
| H | -1.71918900 | -2.81895900 | 1.06181900  |
| H | -0.51628500 | -3.45203600 | 2.19660600  |

### NHO 1d, TS1 ( $\nu = -393.44i \text{ (cm}^{-1}\text{)}$ )

|     |             |             |             |
|-----|-------------|-------------|-------------|
| O 1 |             |             |             |
| C   | -0.28601500 | -0.10017600 | 0.10234400  |
| C   | 1.02428600  | -0.20828100 | -0.34633500 |
| C   | 1.78417000  | 0.93414300  | -0.57299100 |
| C   | -0.08273100 | 2.29417000  | 0.11014700  |
| C   | 1.22589900  | 2.18639900  | -0.34319900 |
| C   | -0.84780500 | 1.15373700  | 0.33282400  |
| H   | 1.45518400  | -1.18759200 | -0.51726900 |
| H   | 2.80478100  | 0.84844900  | -0.92485700 |
| H   | 1.81222200  | 3.08106500  | -0.51507500 |
| H   | -0.52820100 | 3.26324200  | 0.29906300  |
| C   | -2.27071900 | 1.33029900  | 0.81204400  |
| O   | -2.63378900 | 2.39051400  | 1.35190100  |
| O   | -2.75416100 | 0.11580700  | 1.31013000  |
| C   | -3.83559400 | 0.23320900  | 2.22027600  |
| H   | -4.23078300 | -0.77338200 | 2.35300400  |
| H   | -3.49510300 | 0.62467800  | 3.18041700  |
| H   | -4.62142200 | 0.88779000  | 1.84027900  |
| C   | -4.44514500 | 1.21959500  | -0.79277300 |
| C   | -6.44263100 | 0.40186500  | -0.20208700 |
| C   | -6.49675200 | 1.74418200  | -0.07364100 |
| N   | -5.25806300 | 2.24209700  | -0.43477800 |
| N   | -5.17355800 | 0.08472700  | -0.64995300 |
| C   | -3.06980500 | 1.29699300  | -1.07408800 |
| C   | -4.66213400 | -1.24817000 | -0.91484300 |
| C   | -4.88618600 | 3.64681900  | -0.50944600 |
| H   | -0.87818500 | -0.98950600 | 0.27743300  |
| H   | -3.78368000 | -1.43341300 | -0.29700900 |
| H   | -5.44065000 | -1.96753100 | -0.67438100 |
| H   | -4.39703400 | -1.34404000 | -1.96832300 |
| H   | -2.64794900 | 0.43046800  | -1.56816300 |
| H   | -2.71512500 | 2.24938000  | -1.44850200 |
| H   | -3.93082200 | 3.78765200  | -0.00944000 |
| H   | -4.82319000 | 3.96215300  | -1.55214100 |

|   |             |             |             |
|---|-------------|-------------|-------------|
| H | -5.65257700 | 4.22834900  | -0.00323600 |
| H | -7.29749600 | 2.38888700  | 0.24222200  |
| H | -7.18560300 | -0.35396200 | -0.01863000 |

### NHO 1d, TS2 ( $\nu = -180.61i \text{ (cm}^{-1}\text{)}$ )

|     |             |             |             |
|-----|-------------|-------------|-------------|
| O 1 |             |             |             |
| C   | -1.28715900 | -1.37255900 | -0.25547800 |
| C   | -3.20192800 | -1.41386900 | -1.36813100 |
| C   | -3.33148300 | -2.22275300 | -0.29191600 |
| N   | -2.13716400 | -2.18059100 | 0.38743800  |
| N   | -1.92747200 | -0.89389400 | -1.33033900 |
| C   | 0.07667900  | -1.02891900 | 0.21056300  |
| C   | -1.82982900 | -2.92189000 | 1.61082000  |
| C   | -1.40856400 | 0.06985500  | -2.29859600 |
| H   | -1.17182800 | -3.75722100 | 1.37677600  |
| H   | -1.35908600 | -2.24240100 | 2.31691800  |
| H   | -2.76507600 | -3.29717500 | 2.01617400  |
| H   | -1.62732900 | 1.08425000  | -1.96597500 |
| H   | -0.33412100 | -0.05739100 | -2.39839100 |
| H   | -1.88597800 | -0.12516700 | -3.25526600 |
| C   | -0.01976900 | 0.17209300  | 1.18677600  |
| C   | -0.19203400 | 1.50469300  | 0.48095500  |
| C   | 0.68910500  | 1.97571100  | -0.49205400 |
| C   | -1.34426800 | 2.23223500  | 0.76167600  |
| C   | 0.41460100  | 3.15205200  | -1.17495400 |
| H   | 1.59378400  | 1.42012700  | -0.70910300 |
| C   | -1.62613600 | 3.40701600  | 0.07127100  |
| H   | -2.02007300 | 1.85843800  | 1.52114700  |
| C   | -0.74825100 | 3.86736900  | -0.90099900 |
| H   | 1.10816700  | 3.51424500  | -1.92421400 |
| H   | -2.53059700 | 3.96043400  | 0.29292900  |
| H   | -0.96383000 | 4.78159200  | -1.44029900 |
| O   | -0.59950400 | -0.01370400 | 2.26942100  |
| O   | 1.87188400  | 0.15932700  | 1.46191800  |
| C   | 2.19375500  | 1.17499900  | 2.35654200  |
| H   | 3.14533800  | 0.96164300  | 2.85910000  |
| H   | 1.42405900  | 1.26737800  | 3.13717700  |
| H   | 2.29063000  | 2.15577500  | 1.86523600  |
| H   | 0.73282900  | -0.80810300 | -0.63046100 |
| H   | 0.49575000  | -1.86779900 | 0.76430500  |
| O   | 3.24202700  | -0.36077600 | -0.66701000 |
| H   | 2.75758000  | -0.10655100 | 0.17477500  |
| C   | 3.74324700  | -1.66886000 | -0.48718600 |
| H   | 2.91922200  | -2.37775500 | -0.32721000 |
| H   | 4.38377700  | -1.71450700 | 0.40245900  |
| C   | 4.53646100  | -2.07611500 | -1.71218300 |
| H   | 5.36778800  | -1.38702600 | -1.87025600 |
| H   | 4.93886900  | -3.08376000 | -1.59575300 |



|   |             |             |             |
|---|-------------|-------------|-------------|
| H | 3.90153400  | -2.05706700 | -2.59990200 |
| H | -3.89276300 | -1.16377500 | -2.15338100 |
| H | -4.15801600 | -2.82191000 | 0.04625700  |

|   |             |             |            |
|---|-------------|-------------|------------|
| H | -0.23528800 | -0.55520600 | 1.26658400 |
| H | 4.86637800  | -1.45859300 | 0.02098000 |
| H | 4.43970300  | 0.88517100  | 1.42829000 |

### NHO 1d, TS3 ( $\nu = -146.18i$ (cm<sup>-1</sup>))

### NHO 1d, TS4 ( $\nu = -394.66i$ (cm<sup>-1</sup>))

|     |             |             |             |
|-----|-------------|-------------|-------------|
| O 1 |             |             |             |
| C   | 1.77109000  | -0.71593200 | 0.56413900  |
| C   | 3.74851200  | 0.16833700  | 1.02185400  |
| C   | 3.95676600  | -0.97672400 | 0.33244000  |
| N   | 2.71941900  | -1.50821400 | 0.05395500  |
| N   | 2.38596100  | 0.31503900  | 1.15723100  |
| C   | 0.31102200  | -0.91911300 | 0.39898800  |
| C   | 2.47341800  | -2.75691300 | -0.66727300 |
| C   | 1.74024000  | 1.45582100  | 1.80405900  |
| H   | 1.72976000  | -2.57430500 | -1.43897900 |
| H   | 3.41057100  | -3.07275600 | -1.11625100 |
| H   | 2.12672400  | -3.51920500 | 0.02846200  |
| H   | 1.54139600  | 2.23551600  | 1.06974400  |
| H   | 0.80549800  | 1.13573100  | 2.25612100  |
| H   | 2.40849800  | 1.82623500  | 2.57685400  |
| C   | -0.12485200 | -0.21679200 | -0.90952300 |
| C   | -0.44092100 | 1.25039100  | -0.77858100 |
| C   | -1.24914700 | 1.75923300  | 0.23763100  |
| C   | 0.18195900  | 2.12827200  | -1.65993500 |
| C   | -1.42774500 | 3.12877900  | 0.36564900  |
| H   | -1.74142100 | 1.07897200  | 0.92322200  |
| C   | 0.00858700  | 3.50210800  | -1.52737500 |
| H   | 0.80981200  | 1.72137900  | -2.44302900 |
| C   | -0.79501000 | 4.00472300  | -0.51277400 |
| H   | -2.06293900 | 3.51726900  | 1.15247600  |
| H   | 0.50300500  | 4.17810900  | -2.21433700 |
| H   | -0.93164000 | 5.07393500  | -0.40579000 |
| O   | 0.32214100  | -0.66886400 | -1.96367500 |
| C   | -2.61105600 | -3.22577200 | -0.49056000 |
| H   | -3.56090400 | -3.02340200 | 0.01009400  |
| H   | -1.85879400 | -3.39994400 | 0.28274400  |
| H   | -2.71954400 | -4.14057700 | -1.07907100 |
| C   | -2.20969500 | -2.04926200 | -1.38091700 |
| H   | -1.26802400 | -2.30144000 | -1.90108100 |
| H   | -2.96592500 | -1.93981700 | -2.17484900 |
| O   | -2.06093200 | -0.86037800 | -0.67925200 |
| O   | -2.57514900 | -0.92173800 | 1.82639900  |
| H   | -2.38088100 | -0.95568900 | 0.82954700  |
| C   | -3.90489300 | -0.48396400 | 1.97276900  |
| H   | -4.14171900 | -0.41959200 | 3.03637000  |
| H   | -4.06002000 | 0.50787200  | 1.52901700  |
| H   | -4.61731800 | -1.17583800 | 1.50750800  |
| H   | 0.10726400  | -1.98290600 | 0.28575200  |

|     |             |             |             |
|-----|-------------|-------------|-------------|
| O 1 |             |             |             |
| C   | 2.54775100  | -1.05679800 | -0.38177500 |
| C   | 3.86494100  | -1.09618300 | -0.82008200 |
| C   | 4.70204600  | -0.00283200 | -0.62324100 |
| C   | 4.21289900  | 1.12875700  | 0.01845800  |
| C   | 2.89608600  | 1.16602400  | 0.46053500  |
| C   | 2.05455900  | 0.07643500  | 0.26139300  |
| H   | 1.89523500  | -1.90669400 | -0.53709900 |
| H   | 4.24101800  | -1.98368900 | -1.31469500 |
| H   | 5.72888600  | -0.03448800 | -0.96606200 |
| H   | 4.86047500  | 1.98214500  | 0.18006000  |
| H   | 2.50440300  | 2.03796800  | 0.96962900  |
| C   | 0.62553900  | 0.17347400  | 0.75067200  |
| O   | 0.30589700  | 1.01350300  | 1.61297700  |
| O   | 0.06496700  | -1.10794500 | 0.81060400  |
| C   | -1.02854700 | -1.24762200 | 1.71156700  |
| H   | -0.67811600 | -1.08636800 | 2.73367400  |
| H   | -1.79258100 | -0.49326800 | 1.50720300  |
| C   | -1.49424100 | 0.65193600  | -0.85843300 |
| C   | -3.48534400 | -0.35787400 | -0.70198800 |
| C   | -3.58669800 | 0.84284500  | -0.09386700 |
| N   | -2.35280900 | 1.45992900  | -0.19201300 |
| N   | -2.19051400 | -0.46783400 | -1.17420400 |
| C   | -0.11060800 | 0.83916900  | -1.03049600 |
| C   | -2.02408700 | 2.79918600  | 0.27257800  |
| C   | -1.63333700 | -1.57725700 | -1.92669200 |
| H   | -2.84141200 | 3.15257400  | 0.89606000  |
| H   | -1.10854100 | 2.75894200  | 0.85701100  |
| H   | -1.90322700 | 3.47042600  | -0.57895300 |
| H   | 0.34188700  | 0.23452600  | -1.80697500 |
| H   | 0.23785300  | 1.86403700  | -0.99821100 |
| H   | -1.36494800 | -1.24931700 | -2.93167600 |
| H   | -0.75005100 | -1.95651800 | -1.41381300 |
| H   | -2.38447000 | -2.36059600 | -1.99310700 |
| C   | -1.59212600 | -2.64138000 | 1.54408600  |
| H   | -0.82129100 | -3.39381100 | 1.71765600  |
| H   | -2.39928200 | -2.80227500 | 2.26027800  |
| H   | -1.99363200 | -2.78339500 | 0.53947300  |
| H   | -4.41801500 | 1.31295200  | 0.40093600  |
| H   | -4.21083000 | -1.13954900 | -0.84280800 |

### NHO 1e, TS1 ( $\nu = -383.56i$ (cm<sup>-1</sup>))

|     |             |             |             |   |             |             |             |
|-----|-------------|-------------|-------------|---|-------------|-------------|-------------|
| 0 1 |             |             |             | C | -3.53762200 | 1.31595600  | -0.94651000 |
| C   | 3.05805700  | -0.90713000 | 0.00314100  | N | -2.26186300 | 1.42264100  | -1.44651400 |
| C   | 4.36895800  | -0.66824200 | -0.38811700 | N | -2.08584400 | 0.68389000  | 0.57462500  |
| C   | 4.87200500  | 0.62846900  | -0.39981800 | C | 0.08496700  | 0.98099700  | -0.70505400 |
| C   | 4.05488700  | 1.68448000  | -0.01297200 | C | -1.91307300 | 1.93189500  | -2.77353600 |
| C   | 2.74487400  | 1.44496500  | 0.38222600  | C | -1.54777100 | 0.20882700  | 1.86789200  |
| C   | 2.23617500  | 0.14977400  | 0.38944500  | H | -1.55711000 | 2.95751700  | -2.68704900 |
| H   | 2.66591400  | -1.91614100 | 0.00860100  | H | -1.14709100 | 1.28927400  | -3.19993200 |
| H   | 5.00117200  | -1.49708700 | -0.68312200 | H | -2.80970600 | 1.90800200  | -3.38628900 |
| H   | 5.89423900  | 0.81379400  | -0.70574000 | H | -0.46608600 | 0.20901500  | 1.75571700  |
| H   | 4.44071300  | 2.69678300  | -0.01475500 | C | 0.47192400  | -0.34349400 | -1.41050300 |
| H   | 2.10004400  | 2.25824600  | 0.69177900  | C | 0.51327000  | -1.56334900 | -0.50679800 |
| C   | 0.79966600  | -0.05403100 | 0.81189100  | C | 1.17670600  | -1.57715500 | 0.72006700  |
| O   | 0.19436000  | 0.81587600  | 1.46017200  | C | -0.16307300 | -2.70547900 | -0.92245900 |
| O   | 0.58372900  | -1.40193500 | 1.11520700  | C | 1.15816600  | -2.71408300 | 1.51534800  |
| C   | -0.51673500 | -1.64954500 | 1.97495300  | H | 1.73054100  | -0.70244200 | 1.04194200  |
| H   | -0.65852200 | -2.72962500 | 1.98023500  | C | -0.18448000 | -3.84668200 | -0.12540500 |
| H   | -0.30622700 | -1.30058400 | 2.98746100  | H | -0.67029500 | -2.68440800 | -1.87899000 |
| H   | -1.42830500 | -1.16221000 | 1.62523900  | C | 0.47567200  | -3.85270500 | 1.09553700  |
| C   | -1.26053600 | -0.38374200 | -0.90765700 | H | 1.68401600  | -2.71658600 | 2.46253400  |
| N   | -1.72938100 | -1.65542800 | -0.99173800 | H | -0.71669900 | -4.72921400 | -0.45935500 |
| C   | -3.04030300 | -1.69580100 | -0.55860000 | H | 0.46379600  | -4.73966700 | 1.71729200  |
| C   | -3.38411600 | -0.43994200 | -0.20630500 | O | 0.10716300  | -0.49218500 | -2.58902900 |
| N   | -2.27588300 | 0.36574800  | -0.41079500 | O | 2.31930700  | 0.14585100  | -1.36648600 |
| C   | 0.07267600  | 0.00969000  | -1.11633500 | C | 3.06146100  | -0.86925800 | -1.96186600 |
| H   | -0.61883000 | -2.63139600 | -2.47296000 | H | 4.02102500  | -0.48422400 | -2.32848100 |
| H   | -1.55073300 | -3.67982500 | -1.38414800 | H | 2.52621600  | -1.29050200 | -2.82608900 |
| C   | -2.23208500 | 1.82493500  | -0.23698300 | H | 3.27769900  | -1.69643600 | -1.26774200 |
| H   | -0.06127000 | -2.89590300 | -0.80171900 | H | 0.60847000  | 1.10117100  | 0.24126900  |
| C   | -0.93655400 | -2.78492800 | -1.44109000 | H | 0.39209900  | 1.79083800  | -1.36575800 |
| H   | 0.24305600  | 1.05335900  | -1.34587100 | O | 3.02176300  | 1.23952200  | 0.87022200  |
| H   | 0.67103500  | -0.68037200 | -1.69799700 | H | 2.82839200  | 0.78501500  | -0.00501900 |
| H   | -1.17785700 | 2.06560100  | -0.11706600 | C | 3.11115200  | 2.62853300  | 0.63249600  |
| H   | -4.31410900 | -0.05593700 | 0.17194900  | H | 2.27045200  | 2.96354400  | 0.01071700  |
| H   | -3.60508600 | -2.61108400 | -0.54086500 | H | 4.03152800  | 2.86878100  | 0.08513800  |
| C   | -2.94844400 | 2.22871000  | 1.04198600  | C | 3.09420500  | 3.36510300  | 1.95649200  |
| H   | -2.80671300 | 3.29723700  | 1.20525400  | H | 3.93149800  | 3.04478700  | 2.57914800  |
| H   | -4.02265100 | 2.04343700  | 0.97990000  | H | 3.17092000  | 4.44274500  | 1.80233700  |
| H   | -2.53525600 | 1.68762000  | 1.89328600  | H | 2.16725700  | 3.15591600  | 2.49429400  |
| C   | -2.80219800 | 2.51013300  | -1.47287700 | H | -4.18578900 | 0.62853100  | 1.04984200  |
| H   | -2.73373100 | 3.59311700  | -1.36295100 | H | -4.40179700 | 1.57635200  | -1.53165400 |
| H   | -2.25120800 | 2.21586100  | -2.36759600 | C | -1.93954000 | 1.17926000  | 2.97302000  |
| H   | -3.85291100 | 2.24304200  | -1.60703400 | H | -3.02082300 | 1.19242200  | 3.12069800  |

**NHO 1e, TS2 ( $\nu = -179.42i$  (cm<sup>-1</sup>))**

|     |             |            |             |   |             |             |            |
|-----|-------------|------------|-------------|---|-------------|-------------|------------|
| 0 1 |             |            |             | H | -1.60172400 | 2.19002300  | 2.74354100 |
| C   | -1.38471900 | 1.03909200 | -0.51045800 | C | -2.01746200 | -1.21405600 | 2.13114400 |
| C   | -3.42946700 | 0.85175700 | 0.31872300  | H | -1.72407200 | -1.87758200 | 1.31652300 |
|     |             |            |             | H | -1.55863500 | -1.57445800 | 3.05212400 |
|     |             |            |             | H | -3.10199100 | -1.24978500 | 2.25401200 |

**NHO 1e, TS3 ( $\nu = -162.16i$  (cm<sup>-1</sup>))**

|     |             |             |             |
|-----|-------------|-------------|-------------|
| 0 1 |             |             |             |
| C   | 1.54147300  | -1.14844700 | -0.15626000 |
| C   | 3.66266900  | -0.51498400 | -0.21109700 |
| C   | 3.51659700  | -1.54517800 | -1.07458100 |
| N   | 2.19571800  | -1.92232600 | -1.03134300 |
| N   | 2.42658500  | -0.27986200 | 0.35100100  |
| C   | 0.08559600  | -1.23507900 | 0.11974700  |
| C   | 1.60877800  | -3.03081500 | -1.78591500 |
| C   | 2.16845200  | 0.76388600  | 1.36689300  |
| H   | 1.47368200  | -3.88732100 | -1.12712300 |
| H   | 0.65784100  | -2.70495800 | -2.19961000 |
| H   | 2.29682300  | -3.29027500 | -2.58546300 |
| H   | 1.11607000  | 0.67044400  | 1.62456100  |
| C   | -0.69645100 | -0.43188000 | -0.94840600 |
| C   | -0.75358500 | 1.06697400  | -0.72514700 |
| C   | -1.05477500 | 1.64354000  | 0.50871900  |
| C   | -0.46379700 | 1.89364900  | -1.80574300 |
| C   | -1.05489100 | 3.02308500  | 0.65616500  |
| H   | -1.31539000 | 1.01049400  | 1.34962100  |
| C   | -0.46333800 | 3.27743000  | -1.66004600 |
| H   | -0.23932600 | 1.43465200  | -2.76034900 |
| C   | -0.75620700 | 3.84479700  | -0.42767400 |
| H   | -1.29550300 | 3.46159900  | 1.61715200  |
| H   | -0.23205800 | 3.90969000  | -2.50874500 |
| H   | -0.75703500 | 4.92143500  | -0.30918900 |
| O   | -0.68749000 | -0.86126800 | -2.10981300 |
| O   | -2.37741200 | -0.93304800 | -0.08922600 |
| C   | -3.43664900 | -0.35649300 | -0.78142200 |
| H   | -3.21773400 | -0.35203700 | -1.86148700 |
| H   | -3.58348100 | 0.69648900  | -0.48516400 |
| H   | -0.14389200 | -0.89862500 | 1.12888000  |
| H   | -0.23512400 | -2.27210800 | 0.03074600  |
| O   | -2.26507800 | -0.84111300 | 2.47040000  |
| H   | -2.37625400 | -0.83707700 | 1.46584500  |
| C   | -2.23730100 | -2.19052000 | 2.87336800  |
| H   | -1.39832000 | -2.73398000 | 2.42076100  |
| H   | -3.16194000 | -2.71619000 | 2.60880400  |
| H   | 4.53109000  | 0.06437500  | 0.04725400  |
| H   | 4.22805500  | -2.03753700 | -1.71340300 |
| C   | 3.01524000  | 0.49703200  | 2.60318700  |
| H   | 4.07889500  | 0.60417300  | 2.38332500  |
| H   | 2.75601600  | 1.22330100  | 3.37334900  |
| H   | 2.83420200  | -0.50483100 | 2.99272800  |
| C   | 2.40981800  | 2.14053300  | 0.76630000  |
| H   | 1.78612100  | 2.29526500  | -0.11526300 |
| H   | 2.15567100  | 2.89953500  | 1.50658300  |

|   |             |             |             |
|---|-------------|-------------|-------------|
| H | 3.45956900  | 2.26844500  | 0.49410600  |
| H | -2.12151900 | -2.23213800 | 3.95769500  |
| C | -4.73222000 | -1.12171900 | -0.53853400 |
| H | -4.96812900 | -1.13735100 | 0.52819000  |
| H | -5.56789800 | -0.65802100 | -1.06861500 |
| H | -4.63316100 | -2.15369700 | -0.88100500 |

**NHO 1e, TS4 ( $\nu = -385.70i$  (cm<sup>-1</sup>))**

|     |             |             |             |
|-----|-------------|-------------|-------------|
| 0 1 |             |             |             |
| C   | 3.04426900  | -0.95080500 | 0.04300400  |
| C   | 4.37079400  | -0.76934300 | -0.32604700 |
| C   | 4.91853700  | 0.50848500  | -0.36666800 |
| C   | 4.13035800  | 1.60340900  | -0.03139600 |
| C   | 2.80447900  | 1.42115900  | 0.34175900  |
| C   | 2.25136700  | 0.14500900  | 0.37808600  |
| H   | 2.61750500  | -1.94527800 | 0.07347500  |
| H   | 4.98008700  | -1.62794100 | -0.58191400 |
| H   | 5.95264000  | 0.64935500  | -0.65575800 |
| H   | 4.55085400  | 2.60154200  | -0.05654000 |
| H   | 2.18203400  | 2.26499400  | 0.61314700  |
| C   | 0.80000300  | 0.00182800  | 0.77761800  |
| O   | 0.21664900  | 0.90933000  | 1.39645300  |
| O   | 0.53208000  | -1.33016400 | 1.10915900  |
| C   | -0.58011200 | -1.52512600 | 1.97698000  |
| H   | -0.35771000 | -1.08989400 | 2.95457500  |
| H   | -1.46384800 | -1.01350700 | 1.58853800  |
| C   | -1.22170900 | -0.36622000 | -0.96652100 |
| N   | -1.64337000 | -1.65348300 | -1.06460500 |
| C   | -2.95785100 | -1.74462300 | -0.65001300 |
| C   | -3.35021500 | -0.50472900 | -0.29185700 |
| N   | -2.27052500 | 0.34281700  | -0.48003600 |
| C   | 0.10370200  | 0.06459000  | -1.15288400 |
| H   | -0.54259400 | -2.55548300 | -2.59944700 |
| H   | -1.38642700 | -3.66237900 | -1.49521800 |
| C   | -2.28055700 | 1.79378200  | -0.24503000 |
| H   | 0.08386500  | -2.81978700 | -0.95148600 |
| C   | -0.81659800 | -2.73859000 | -1.55970300 |
| H   | 0.25381100  | 1.11535800  | -1.36243800 |
| H   | 0.72131400  | -0.60007900 | -1.74412600 |
| H   | -1.23326200 | 2.08684700  | -0.21958800 |
| H   | -4.29723300 | -0.15662400 | 0.07960800  |
| H   | -3.49067100 | -2.67923600 | -0.65002100 |
| C   | -2.88058500 | 2.10054200  | 1.11858800  |
| H   | -2.78849200 | 3.16876600  | 1.31706500  |
| H   | -3.94170200 | 1.84576800  | 1.15817800  |
| H   | -2.34211300 | 1.55166000  | 1.89112000  |
| C   | -3.00655500 | 2.49874700  | -1.38422500 |
| H   | -2.98461900 | 3.57761500  | -1.22674100 |

|   |             |             |             |
|---|-------------|-------------|-------------|
| H | -2.53327300 | 2.27669800  | -2.34180700 |
| H | -4.05050000 | 2.18006000  | -1.42921400 |
| C | -0.82382000 | -3.01375900 | 2.08854600  |
| H | 0.06794700  | -3.52564100 | 2.45358400  |
| H | -1.64094900 | -3.20458200 | 2.78587800  |
| H | -1.09453500 | -3.43806800 | 1.12017000  |

|   |             |             |             |
|---|-------------|-------------|-------------|
| H | 2.71436700  | -3.01856100 | 0.21574900  |
| C | -0.87606900 | 0.71238100  | -1.95368800 |
| H | -0.96132300 | 1.68995200  | -1.48559500 |
| H | -0.36401100 | 0.83695200  | -2.91609000 |
| H | -1.89656400 | 0.39574900  | -2.17289300 |
| C | -0.67573600 | -1.73519300 | -1.50809600 |
| H | -0.10056500 | -2.12841400 | -2.35423200 |
| H | -0.64428300 | -2.45925900 | -0.69629500 |
| H | -1.71397800 | -1.67614300 | -1.83514900 |

### NHO 2a, TS1 ( $\nu = -325.88i$ (cm<sup>-1</sup>))

O 1

|   |             |             |             |
|---|-------------|-------------|-------------|
| C | -2.96042900 | 1.24310400  | 0.36416800  |
| C | -4.29361000 | 1.37649500  | -0.00216500 |
| C | -5.08574500 | 0.24930000  | -0.18765500 |
| C | -3.20718700 | -1.14690400 | 0.38218600  |
| C | -4.53846400 | -1.01386900 | 0.01057200  |
| C | -2.40149900 | -0.02186500 | 0.54719100  |
| H | -4.71737700 | 2.36428800  | -0.13907800 |
| H | -6.12477700 | 0.35444700  | -0.47461100 |
| H | -5.15347300 | -1.89671000 | -0.11659500 |
| H | 4.18039900  | -1.86068000 | 1.45367700  |
| H | -2.77397300 | -2.12403700 | 0.55442700  |
| C | -0.96426000 | -0.22171600 | 0.93770800  |
| O | -0.59061200 | -1.26798000 | 1.49612000  |
| O | -0.41172000 | 1.00224400  | 1.32589200  |
| C | 0.69310100  | 0.91092200  | 2.20861200  |
| H | 1.14434800  | 1.90312600  | 2.23678700  |
| H | 0.36589000  | 0.62914000  | 3.21148900  |
| H | 1.42936400  | 0.18311400  | 1.86802900  |
| C | 1.15503500  | -0.18125800 | -0.75011500 |
| C | 3.14021500  | 0.76714800  | -0.19787400 |
| C | 3.25485500  | -0.55876400 | 0.01861100  |
| N | 2.03436400  | -1.14016600 | -0.32599900 |
| N | 1.85166600  | 0.99521500  | -0.67852300 |
| C | -0.22752500 | -0.34827100 | -1.07432400 |
| C | 1.35198200  | 2.34444100  | -0.92066100 |
| C | 1.80059900  | -2.57538400 | -0.16588700 |
| C | 4.41614100  | -1.34371200 | 0.52134700  |
| C | 4.13332800  | 1.85782400  | 0.00338800  |
| H | -2.34737600 | 2.12197000  | 0.51442900  |
| H | 4.74609100  | -2.08925700 | -0.20495600 |
| H | 5.25144700  | -0.67464000 | 0.71452300  |
| H | 5.07268500  | 1.43694600  | 0.35411900  |
| H | 4.33316400  | 2.39702900  | -0.92471700 |
| H | 3.79196800  | 2.58002400  | 0.74835800  |
| H | 0.51541300  | 2.55605600  | -0.25925500 |
| H | 2.15514600  | 3.04188700  | -0.70674400 |
| H | 1.05482400  | 2.47163300  | -1.95755300 |
| H | 1.00088400  | -2.74236900 | 0.54775500  |
| H | 1.56976600  | -3.03978900 | -1.11994500 |

### NHO 2a, TS2 ( $\nu = -172.51i$ (cm<sup>-1</sup>))

O 1

|   |             |             |             |
|---|-------------|-------------|-------------|
| C | -1.40155400 | -0.83149700 | -0.40568900 |
| C | -3.41414200 | 0.00785300  | -0.92568800 |
| C | -3.60430500 | -0.99182200 | -0.03146700 |
| N | -2.35075200 | -1.48754600 | 0.28742600  |
| N | -2.04631900 | 0.09812400  | -1.14123400 |
| C | 0.10256000  | -1.08540700 | -0.33416300 |
| C | -2.17587100 | -2.53021900 | 1.30373200  |
| C | -1.48221600 | 1.15333500  | -1.98798100 |
| C | -4.40954200 | 0.88601600  | -1.59950200 |
| C | -4.86212200 | -1.53628700 | 0.54862000  |
| H | -4.32013700 | 0.83205000  | -2.68538100 |
| H | -5.41337900 | 0.56866300  | -1.32787900 |
| H | -4.29596200 | 1.92831500  | -1.29582000 |
| H | -4.93020700 | -2.61491900 | 0.40076200  |
| H | -4.93339700 | -1.33204100 | 1.61839900  |
| H | -5.71801700 | -1.07434800 | 0.06253300  |
| H | -1.31595900 | -2.28026700 | 1.91478200  |
| H | -3.06684900 | -2.53623300 | 1.92321600  |
| H | -2.05966900 | -3.50300300 | 0.83068800  |
| H | -0.71560400 | 1.69760000  | -1.44467400 |
| H | -1.08089700 | 0.73684800  | -2.90712600 |
| H | -2.28414400 | 1.84100500  | -2.23169400 |
| C | 0.57422300  | -0.30741300 | 0.95591000  |
| C | 0.44921900  | 1.20721700  | 0.83801900  |
| C | 1.36242100  | 2.04948700  | 0.20703100  |
| C | -0.72242100 | 1.76011500  | 1.35928600  |
| C | 1.09558700  | 3.40904000  | 0.08238300  |
| H | 2.28424700  | 1.64062700  | -0.18418900 |
| C | -0.99737300 | 3.11477000  | 1.22222700  |
| H | -1.42473700 | 1.11046900  | 1.87054000  |
| C | -0.08760300 | 3.94454900  | 0.57720000  |
| H | 1.81724100  | 4.05253000  | -0.40629700 |
| H | -1.91787700 | 3.52259000  | 1.62260400  |
| H | -0.29436300 | 5.00226800  | 0.46969500  |
| O | 0.27966600  | -0.81080700 | 2.05645600  |
| C | 0.39639600  | -2.58849000 | -0.16947000 |

|   |             |             |             |
|---|-------------|-------------|-------------|
| H | 0.25815200  | -2.92769300 | 0.85030600  |
| H | -0.22237100 | -3.18515900 | -0.84369000 |
| H | 1.44150800  | -2.74913900 | -0.42270500 |
| C | 0.80443100  | -0.65477800 | -1.63215800 |
| H | 0.90469500  | 0.41935600  | -1.74846600 |
| H | 1.80962800  | -1.06558000 | -1.62025800 |
| H | 0.27899900  | -1.06096700 | -2.49986100 |
| C | 3.10224100  | -0.26675900 | 1.82541400  |
| H | 4.05746900  | -0.80803000 | 1.86915500  |
| H | 3.32675400  | 0.80912700  | 1.92007700  |
| H | 2.51314800  | -0.56381300 | 2.70334200  |
| O | 2.43057100  | -0.56606300 | 0.64434900  |
| H | 3.39756200  | -0.05567300 | -0.54956400 |
| C | 5.18867300  | -1.87342800 | -0.87321500 |
| H | 4.86637300  | -2.24225000 | -1.84914200 |
| H | 4.45212100  | -2.18432400 | -0.12848100 |
| H | 6.14949800  | -2.33107700 | -0.62806300 |
| C | 5.29779000  | -0.35696200 | -0.89278200 |
| H | 5.65900000  | -0.00079100 | 0.08096800  |
| H | 6.02763400  | -0.04037400 | -1.64220500 |
| O | 4.06859900  | 0.25990300  | -1.21970100 |

|   |             |             |             |
|---|-------------|-------------|-------------|
| C | -1.65122800 | 1.70297500  | -0.24586200 |
| C | 0.29049700  | 1.46576700  | -1.64009200 |
| C | -1.60288100 | 3.08062600  | -0.42598100 |
| H | -2.42200500 | 1.25166500  | 0.36281200  |
| C | 0.34843400  | 2.84376900  | -1.80777900 |
| H | 1.02457900  | 0.82650100  | -2.11882200 |
| C | -0.59914900 | 3.65621600  | -1.19704300 |
| H | -2.35266700 | 3.70745700  | 0.04184100  |
| H | 1.12960200  | 3.28158100  | -2.41728900 |
| H | -0.56081200 | 4.73071800  | -1.32746500 |
| O | -0.38305000 | -1.31086800 | -1.65527500 |
| C | -0.04701200 | -2.59741500 | 0.85264400  |
| H | 0.04458200  | -3.12218300 | -0.09114900 |
| H | 0.69181800  | -2.97836000 | 1.56120800  |
| H | -1.04229300 | -2.80146400 | 1.23854600  |
| C | -0.54039200 | -0.45852500 | 1.95923600  |
| H | -0.74290100 | 0.60427000  | 1.89104600  |
| H | -1.49252800 | -0.94981000 | 2.13439800  |
| H | 0.10766800  | -0.64390100 | 2.81951200  |
| C | -4.33289000 | -2.20845500 | -1.05379100 |
| H | -4.95858200 | -2.06482200 | -0.16928600 |
| H | -3.84222700 | -3.18031800 | -0.96407300 |
| H | -4.97946200 | -2.22547800 | -1.93536900 |
| C | -3.28574400 | -1.10142900 | -1.15536800 |
| H | -2.66700000 | -1.28907400 | -2.04744600 |
| H | -3.80173500 | -0.13856600 | -1.33067400 |
| O | -2.48819000 | -1.04622800 | -0.02064200 |
| O | -3.92537900 | -0.00371900 | 1.84363800  |
| H | -3.35727900 | -0.42975300 | 1.12120200  |
| C | -4.99152600 | 0.68410000  | 1.23359300  |
| H | -5.63159700 | 1.10008200  | 2.01407000  |
| H | -4.64421700 | 1.51503100  | 0.60559600  |
| H | -5.60544200 | 0.02622700  | 0.60738100  |

### NHO 2a, TS3 ( $\nu = -168.00i$ (cm<sup>-1</sup>))

|     |             |             |             |
|-----|-------------|-------------|-------------|
| 0 1 |             |             |             |
| C   | 1.54255100  | -0.65521300 | 0.53401300  |
| C   | 3.47380500  | 0.47663100  | 0.63596500  |
| C   | 3.70248100  | -0.66483100 | -0.05747300 |
| N   | 2.49622200  | -1.34252700 | -0.12205600 |
| N   | 2.13101000  | 0.47161400  | 0.98530500  |
| C   | 0.07897800  | -1.07166700 | 0.69369500  |
| C   | 2.35815700  | -2.58781600 | -0.88351300 |
| C   | 1.51684000  | 1.62456200  | 1.65165900  |
| C   | 4.41057600  | 1.57345000  | 1.00375700  |
| C   | 4.95759200  | -1.18721000 | -0.66303100 |
| H   | 4.41024300  | 1.75412400  | 2.07940600  |
| H   | 5.42100600  | 1.30054700  | 0.70915400  |
| H   | 4.15561000  | 2.50618600  | 0.49737300  |
| H   | 5.16975800  | -2.20014300 | -0.31847700 |
| H   | 4.90152700  | -1.20047600 | -1.75299200 |
| H   | 5.79298700  | -0.55200700 | -0.37910600 |
| H   | 1.42823200  | -2.55913900 | -1.43934800 |
| H   | 3.18909500  | -2.64028100 | -1.57918200 |
| H   | 2.39301400  | -3.44567700 | -0.21588200 |
| H   | 0.63553700  | 1.94434300  | 1.10316800  |
| H   | 1.26629900  | 1.38553100  | 2.68099200  |
| H   | 2.24000800  | 2.43235400  | 1.63988000  |
| C   | -0.58304800 | -0.61859100 | -0.65561600 |
| C   | -0.69912400 | 0.88268000  | -0.84660300 |

### NHO 2a, TS4 ( $\nu = -317.80i$ (cm<sup>-1</sup>))

|     |             |             |             |
|-----|-------------|-------------|-------------|
| 0 1 |             |             |             |
| C   | -2.93170200 | 1.27902000  | -0.03410500 |
| C   | -4.25328700 | 1.39409800  | -0.44589100 |
| C   | -5.11779900 | 0.31064900  | -0.33767200 |
| C   | -3.33488000 | -0.99828600 | 0.61739700  |
| C   | -4.65465400 | -0.88550200 | 0.20045900  |
| C   | -2.45727900 | 0.07690000  | 0.48983500  |
| H   | -4.61134200 | 2.33380900  | -0.84946500 |
| H   | -6.14743200 | 0.40057700  | -0.66137000 |
| H   | -5.32699400 | -1.72904100 | 0.30166200  |
| H   | 4.23717800  | -1.46685200 | 1.70172900  |
| H   | -2.96552000 | -1.91918300 | 1.05110000  |
| C   | -1.03137100 | -0.10847500 | 0.93097200  |

|   |             |             |             |   |             |             |             |
|---|-------------|-------------|-------------|---|-------------|-------------|-------------|
| O | -0.73172300 | -0.98858900 | 1.76023500  | H | -4.40945400 | 2.24150600  | -0.37009300 |
| O | -0.39505600 | 1.13629500  | 0.99278900  | H | -5.72548100 | 0.16387900  | -0.66671900 |
| C | 0.69996800  | 1.21041100  | 1.89737300  | H | -4.67344900 | -2.03027400 | -0.19611800 |
| H | 0.34607900  | 1.01598400  | 2.91263900  | H | -2.30967400 | -2.13319000 | 0.54576300  |
| H | 1.44511500  | 0.44717600  | 1.66073500  | C | -0.57333000 | -0.14998800 | 0.89802900  |
| C | 1.06063900  | -0.56714900 | -0.74486700 | O | -0.22821600 | -1.13780300 | 1.58268300  |
| C | 3.05243700  | 0.50944800  | -0.61707000 | O | -0.10254700 | 1.13155500  | 1.26652800  |
| C | 3.20135400  | -0.68585900 | -0.00978100 | C | 0.93268300  | 1.13424700  | 2.23149900  |
| N | 1.97665400  | -1.34742200 | -0.09402100 | H | 1.36515900  | 2.13560200  | 2.21723100  |
| N | 1.73501200  | 0.57723400  | -1.06816900 | H | 0.53927000  | 0.92498900  | 3.22887200  |
| C | -0.33283900 | -0.83323200 | -0.94537000 | H | 1.70260000  | 0.39534200  | 2.00740000  |
| C | 1.20146500  | 1.77028000  | -1.71600800 | C | 1.62900000  | -0.14576900 | -0.59213100 |
| C | 1.76288100  | -2.64523300 | 0.54740000  | C | 3.62904400  | 0.91716700  | -0.06044500 |
| C | 4.40265800  | -1.28123000 | 0.63859200  | C | 3.82014100  | -0.58296400 | 0.04297100  |
| C | 4.04645800  | 1.59384300  | -0.84952900 | N | 2.44789600  | -1.07249800 | -0.04192600 |
| H | -2.26000400 | 2.12403700  | -0.11474000 | N | 2.32318300  | 1.02063700  | -0.71209000 |
| H | 4.68619900  | -2.22551300 | 0.16975500  | C | 0.25168300  | -0.34464100 | -0.93911700 |
| H | 5.24298000  | -0.59697700 | 0.54767700  | C | 1.81616700  | 2.37779000  | -0.89654100 |
| H | 5.01596100  | 1.28766100  | -0.46361600 | C | 2.23905300  | -2.49447800 | 0.18951300  |
| H | 4.16226700  | 1.80793600  | -1.91391600 | H | -2.05012000 | 2.12059400  | 0.34899700  |
| H | 3.76657100  | 2.52158600  | -0.34598900 | H | 2.64536900  | 3.05122600  | -0.68702400 |
| H | 0.35611000  | 2.15146400  | -1.14922500 | H | 1.49478100  | 2.55134000  | -1.91999400 |
| H | 1.98326600  | 2.52356400  | -1.72576200 | H | 1.00293700  | 2.59712400  | -0.20647700 |
| H | 0.90906500  | 1.56226600  | -2.74181400 | H | 1.29196900  | -2.65626600 | 0.68871700  |
| H | 0.98296300  | -2.55945100 | 1.29652800  | H | 2.30357600  | -3.07436600 | -0.73308900 |
| H | 1.51180400  | -3.40506900 | -0.18676000 | H | 3.03535400  | -2.82271200 | 0.85647400  |
| H | 2.69044700  | -2.93135400 | 1.03176700  | H | 4.41320000  | -0.98265500 | -0.78642800 |
| C | -1.01176100 | -0.12660300 | -2.11419800 | H | 4.39435100  | 1.40703500  | -0.65978900 |
| H | -1.10306200 | 0.95001100  | -2.00033400 | H | 4.27724500  | -0.89022200 | 0.98265000  |
| H | -0.51709200 | -0.32962000 | -3.07223300 | H | 3.59052000  | 1.39522400  | 0.92457400  |
| H | -2.03179400 | -0.50515600 | -2.19240100 | C | -0.12895600 | -1.75504000 | -1.38265000 |
| C | -0.76484600 | -2.29070300 | -0.91034700 | H | 0.57263500  | -2.16968400 | -2.11292800 |
| H | -0.20415900 | -2.92054000 | -1.61056900 | H | -0.21312200 | -2.44850900 | -0.54954600 |
| H | -0.69812900 | -2.72279200 | 0.08547500  | H | -1.10615900 | -1.71726700 | -1.86324800 |
| H | -1.81233300 | -2.34570600 | -1.20780500 | C | -0.34762200 | 0.68467300  | -1.89108000 |
| C | 1.29848200  | 2.59535400  | 1.78687900  | H | -0.46580300 | 1.67016800  | -1.44830200 |
| H | 2.13825100  | 2.69352900  | 2.47670900  | H | 0.23692100  | 0.78668900  | -2.81255500 |
| H | 1.66225500  | 2.78193400  | 0.77552100  | H | -1.34643400 | 0.35300800  | -2.17367300 |
| H | 0.55837700  | 3.35899800  | 2.03142500  |   |             |             |             |

### NHO 2b, TS2 ( $\nu = -162.08i \text{ (cm}^{-1}\text{)}$ )

0 1

|   |             |             |             |
|---|-------------|-------------|-------------|
| C | -1.70248900 | -0.97880400 | -0.46554100 |
| C | -3.75177100 | -0.15164800 | -1.12317600 |
| C | -3.96520700 | -1.34782200 | -0.21508300 |
| N | -2.61052500 | -1.59238000 | 0.28871000  |
| N | -2.30276300 | -0.19215600 | -1.36494200 |
| C | -0.19278000 | -1.15186100 | -0.30713300 |
| C | -2.46166300 | -2.58081300 | 1.35063900  |

### NHO 2b, TS1 ( $\nu = -374.44i \text{ (cm}^{-1}\text{)}$ )

0 1

|   |             |             |             |
|---|-------------|-------------|-------------|
| C | -2.62239500 | 1.21193900  | 0.21760900  |
| C | -3.95043500 | 1.27743700  | -0.18606000 |
| C | -4.69111500 | 0.11274800  | -0.34934200 |
| C | -2.77362800 | -1.18132400 | 0.32166300  |
| C | -4.09895700 | -1.11802600 | -0.08834600 |
| C | -2.01760700 | -0.01970100 | 0.46271400  |

|   |             |             |             |     |             |             |             |
|---|-------------|-------------|-------------|-----|-------------|-------------|-------------|
| C | -1.77013200 | 0.88407800  | -2.20255200 | O 1 |             |             |             |
| H | -1.62437800 | -2.31595700 | 1.98442700  | C   | 1.75008200  | -0.87935400 | 0.45495800  |
| H | -3.37669500 | -2.54663200 | 1.93927300  | C   | 3.79536100  | 0.09028400  | 0.90038600  |
| H | -2.34720100 | -3.58369400 | 0.93725500  | C   | 4.00371000  | -1.13708400 | 0.03250700  |
| H | -1.11769400 | 1.54563900  | -1.63677000 | N   | 2.62900600  | -1.49106900 | -0.33416500 |
| H | -1.25328100 | 0.49137100  | -3.07339900 | N   | 2.37258100  | -0.00795800 | 1.25506800  |
| H | -2.62793200 | 1.45965800  | -2.54341800 | C   | 0.24373600  | -1.13952100 | 0.43059500  |
| C | 0.16799900  | -0.26518000 | 0.95625400  | C   | 2.45659300  | -2.54792000 | -1.32479800 |
| C | -0.06305000 | 1.22508700  | 0.73357500  | C   | 1.84563800  | 1.08502700  | 2.07387300  |
| C | 0.82572000  | 2.10145000  | 0.11528600  | H   | 1.57059900  | -2.35734100 | -1.91815300 |
| C | -1.30856000 | 1.70873500  | 1.14094600  | H   | 3.33086000  | -2.51340000 | -1.97232000 |
| C | 0.46378000  | 3.42584600  | -0.11026200 | H   | 2.41195300  | -3.52787000 | -0.84810300 |
| H | 1.80122500  | 1.74647600  | -0.18817300 | H   | 1.39156300  | 0.71436300  | 2.98786400  |
| C | -1.67756900 | 3.02594800  | 0.90046800  | H   | 2.69799400  | 1.70470800  | 2.34307800  |
| H | -1.99227700 | 1.03391400  | 1.64517300  | H   | 1.13859200  | 1.69577500  | 1.51578100  |
| C | -0.79048900 | 3.88918300  | 0.26760200  | C   | -0.25948900 | -0.34756700 | -0.84251200 |
| H | 1.16680400  | 4.09774600  | -0.58776100 | C   | -0.12777400 | 1.16414600  | -0.72356800 |
| H | -2.65312100 | 3.37934200  | 1.21218400  | C   | -1.01354000 | 2.00842900  | -0.05791000 |
| H | -1.07065600 | 4.91837400  | 0.07945600  | C   | 1.02686100  | 1.71145500  | -1.28765300 |
| O | -0.12841000 | -0.72151500 | 2.07406300  | C   | -0.73625000 | 3.36636700  | 0.05726700  |
| C | 2.65360300  | -0.01160100 | 1.90797900  | H   | -1.92014600 | 1.60030700  | 0.36689600  |
| H | 3.63093700  | -0.50104900 | 2.02112800  | C   | 1.31249300  | 3.06485300  | -1.15871600 |
| H | 2.82250200  | 1.07763500  | 1.94931000  | H   | 1.70573500  | 1.06034000  | -1.82819900 |
| H | 2.04285800  | -0.28838100 | 2.77771900  | C   | 0.43016200  | 3.89734500  | -0.48052800 |
| O | 2.04775400  | -0.41013900 | 0.72064600  | H   | -1.43636700 | 4.01227000  | 0.57316200  |
| H | 3.03410800  | 0.10791700  | -0.45947000 | H   | 2.21936100  | 3.46948400  | -1.59186600 |
| C | 4.84249100  | -1.68858200 | -0.65844300 | H   | 0.64505600  | 4.95406500  | -0.37988700 |
| H | 4.54694300  | -2.09301300 | -1.62883500 | O   | -0.03600400 | -0.85269200 | -1.95041500 |
| H | 4.08742300  | -1.97522200 | 0.07744800  | C   | -4.20638900 | -1.02990600 | -1.62224500 |
| H | 5.79847700  | -2.13233900 | -0.37221200 | H   | -4.82479300 | -0.69960500 | -0.78494700 |
| C | 4.94659000  | -0.17318700 | -0.72899700 | H   | -4.06206600 | -2.10940000 | -1.53667400 |
| H | 5.28150800  | 0.21829400  | 0.24071300  | H   | -4.74570500 | -0.82468800 | -2.55044500 |
| H | 5.69395800  | 0.12072900  | -1.47031300 | C   | -2.85822000 | -0.31730300 | -1.60726300 |
| O | 3.72330400  | 0.42586600  | -1.10835000 | H   | -2.27398300 | -0.63481800 | -2.48249500 |
| H | -4.31125100 | -2.23212800 | -0.75656500 | H   | -3.02857300 | 0.76903600  | -1.71881300 |
| H | -4.29431700 | -0.21779600 | -2.06332800 | O   | -2.15426700 | -0.59648700 | -0.43897300 |
| H | -4.64405000 | -1.14548000 | 0.61037500  | O   | -3.64436800 | 0.27296000  | 1.49833800  |
| H | -3.99515800 | 0.79393300  | -0.62958300 | H   | -3.04516700 | -0.06807900 | 0.76708300  |
| C | 0.55201600  | -0.75787600 | -1.59124600 | C   | -4.21500000 | -0.84126600 | 2.14301700  |
| H | 1.57208700  | -1.12024800 | -1.51040900 | H   | -5.00922500 | -0.49425000 | 2.80625200  |
| H | 0.08865200  | -1.23251200 | -2.45919100 | H   | -4.65144300 | -1.54765400 | 1.42780500  |
| H | 0.60728100  | 0.31272600  | -1.75809500 | H   | -3.48206700 | -1.38542400 | 2.75208900  |
| C | 0.16050700  | -2.62492300 | -0.03217700 | H   | 4.40869900  | 0.09467900  | 1.79843300  |
| H | -0.41239100 | -3.29369300 | -0.67879400 | H   | 4.45543000  | -1.96933600 | 0.57803200  |
| H | 1.21802200  | -2.75554000 | -0.24838500 | H   | 4.59055800  | -0.93533900 | -0.86091700 |
| H | 0.00548300  | -2.90020100 | 1.00417400  | H   | 3.95437600  | 1.02192900  | 0.34997900  |
|   |             |             |             | C   | -0.05011200 | -2.64063200 | 0.26097100  |
|   |             |             |             | H   | 0.57718900  | -3.24061400 | 0.92434900  |
|   |             |             |             | H   | -1.09229400 | -2.79878800 | 0.52746600  |

**NHO 2b, TS3 ( $\nu = -161.63i \text{ (cm}^{-1}\text{)}$ )**

|   |             |             |             |
|---|-------------|-------------|-------------|
| H | 0.07564200  | -2.97629700 | -0.76111900 |
| C | -0.41912500 | -0.71195400 | 1.74727800  |
| H | -1.41742900 | -1.13550800 | 1.76543300  |
| H | 0.13680300  | -1.10959700 | 2.59938000  |
| H | -0.52758100 | 0.36161200  | 1.85898400  |

|   |             |             |             |
|---|-------------|-------------|-------------|
| H | 0.74590500  | 0.20628200  | 2.14625100  |
| H | -0.06871400 | -1.25910300 | 2.70768400  |
| H | 1.48208700  | -1.34528900 | 1.87512900  |
| C | -1.48944500 | 3.03028800  | -1.06243000 |
| H | -0.73629800 | 3.81448300  | -0.96971100 |
| H | -2.25454500 | 3.36937200  | -1.76274900 |
| H | -1.95518700 | 2.88446700  | -0.08658800 |

### NHO 2b, TS4 ( $\nu = -363.05i$ (cm<sup>-1</sup>))

### 0 1 NHO 2c, TS1 ( $\nu = -201.05i$ (cm<sup>-1</sup>))

|   |             |             |             |
|---|-------------|-------------|-------------|
| C | 2.63633400  | 1.05342600  | 0.47815200  |
| C | 3.94340000  | 0.97334600  | 0.94442500  |
| C | 4.75318400  | -0.09606600 | 0.57965900  |
| C | 2.94723400  | -0.99279700 | -0.73696200 |
| C | 4.25123800  | -1.07868700 | -0.26682700 |
| C | 2.12423400  | 0.06529100  | -0.35922400 |
| H | 4.33152500  | 1.74906200  | 1.59367700  |
| H | 5.77049700  | -0.15895200 | 0.94600900  |
| H | 4.87980800  | -1.90881400 | -0.56630400 |
| H | 2.54885100  | -1.74094900 | -1.41071100 |
| C | 0.70348100  | 0.08285500  | -0.88726700 |
| O | 0.46902600  | -0.46646700 | -1.99166800 |
| O | 0.15259800  | 1.36569000  | -0.64676400 |
| C | -0.86426100 | 1.74519000  | -1.55958400 |
| H | -0.43331700 | 1.87858100  | -2.55507000 |
| H | -1.61333800 | 0.95274900  | -1.64593300 |
| C | -1.52764500 | -0.57430500 | 0.48661900  |
| C | -3.49945100 | 0.51343200  | 1.04156600  |
| C | -3.72003700 | -0.30091700 | -0.21679500 |
| N | -2.51688000 | -1.13363800 | -0.26464600 |
| N | -2.04517300 | 0.46607400  | 1.17249500  |
| C | -0.15659400 | -1.01943000 | 0.53625600  |
| C | -1.41164900 | 1.37016200  | 2.11740000  |
| C | -2.35594000 | -1.93647100 | -1.48051600 |
| H | 2.00892400  | 1.88884200  | 0.76201500  |
| H | -2.09775300 | 2.20305000  | 2.26571000  |
| H | -1.22779000 | 0.90099400  | 3.08437100  |
| H | -0.48853800 | 1.76087500  | 1.69813600  |
| H | -1.53114200 | -1.56420800 | -2.08535900 |
| H | -2.20999000 | -2.98815000 | -1.24606300 |
| H | -3.28376300 | -1.84178600 | -2.04212100 |
| H | -4.61446200 | -0.91971800 | -0.18151400 |
| H | -3.96966500 | 0.05699500  | 1.91818900  |
| H | -3.76350900 | 0.33656400  | -1.10783400 |
| H | -3.84447100 | 1.54230800  | 0.94972000  |
| C | 0.06475600  | -2.45180900 | 0.06539200  |
| H | -0.64940800 | -3.15184500 | 0.51186200  |
| H | 0.01929200  | -2.53798000 | -1.01724700 |
| H | 1.06185700  | -2.76922200 | 0.37072700  |
| C | 0.52403600  | -0.82560000 | 1.89426400  |

|     |             |             |             |
|-----|-------------|-------------|-------------|
| 0 1 |             |             |             |
| C   | -3.07258300 | -1.08196400 | 0.03008700  |
| C   | -4.38765000 | -0.80718800 | 0.39138100  |
| C   | -4.87730700 | 0.49095500  | 0.32555300  |
| C   | -2.73526100 | 1.23022800  | -0.48825800 |
| C   | -4.04619900 | 1.50997600  | -0.12638100 |
| C   | -2.22268100 | -0.06187900 | -0.39604200 |
| H   | -5.03387600 | -1.61409800 | 0.71604400  |
| H   | -5.90136200 | 0.70452200  | 0.60668400  |
| H   | -4.42351600 | 2.52257300  | -0.20547100 |
| H   | -2.09712600 | 2.01752300  | -0.86998500 |
| C   | -0.76066900 | -0.29213900 | -0.79107100 |
| O   | -0.27161200 | 0.50791700  | -1.64978800 |
| O   | -0.68276200 | -1.69459800 | -1.11093000 |
| C   | 0.44699000  | -2.11404800 | -1.84342100 |
| H   | 1.17794700  | -2.59957300 | -1.18889500 |
| H   | 0.11307600  | -2.83424700 | -2.59264600 |
| H   | 0.91726000  | -1.26797900 | -2.34541200 |
| H   | -2.71125800 | -2.10081400 | 0.05521600  |
| C   | 3.52127200  | -0.55610300 | -0.61600000 |
| C   | 4.22380500  | 0.71356800  | -0.17685600 |
| C   | 3.19069400  | 1.80988700  | -0.30583700 |
| H   | 4.17020600  | -1.42982700 | -0.61485400 |
| H   | 3.10719000  | -0.43836700 | -1.62059700 |
| H   | 3.42988600  | 2.67497300  | 0.31595800  |
| H   | 3.14676900  | 2.15144300  | -1.34263700 |
| C   | 1.48433200  | 0.17458500  | 0.45896100  |
| C   | 0.10842100  | -0.18318800 | 0.86777400  |
| N   | 1.81756400  | 1.39335300  | 0.04775100  |
| N   | 2.42932000  | -0.80569000 | 0.31790500  |
| C   | 2.83209200  | -1.64116300 | 1.45289100  |
| H   | 3.87706300  | -1.42473100 | 1.68934500  |
| H   | 2.24655600  | -1.41829900 | 2.33590400  |
| H   | 2.74136500  | -2.70079800 | 1.20881300  |
| C   | 0.90803000  | 2.53552000  | -0.06131000 |
| H   | -0.08200000 | 2.20350800  | -0.32465900 |
| H   | 0.92075300  | 3.11211700  | 0.86527700  |
| H   | 1.27250000  | 3.16544200  | -0.87190400 |
| C   | -0.05490700 | -1.56940300 | 1.49058800  |



|   |             |             |             |
|---|-------------|-------------|-------------|
| H | 0.47874100  | -2.35356400 | 0.96148500  |
| H | 0.23830700  | -1.57590900 | 2.54400600  |
| H | -1.11402500 | -1.81918300 | 1.46362300  |
| C | -0.55823700 | 0.80220200  | 1.84315800  |
| H | 0.10916500  | 1.01070300  | 2.68569800  |
| H | -0.87577900 | 1.74892200  | 1.42050000  |
| H | -1.45526100 | 0.32963800  | 2.24643600  |
| H | 4.56637300  | 0.60391400  | 0.85412500  |
| H | 5.08699100  | 0.95284100  | -0.79719800 |

|   |             |             |             |
|---|-------------|-------------|-------------|
| N | -3.03687600 | -1.00004200 | 0.30395400  |
| N | -2.37188700 | 0.72660800  | -1.05463400 |
| C | -1.48260300 | 1.80941100  | -1.48611700 |
| H | -2.01506800 | 2.74075100  | -1.28808200 |
| H | -0.56269800 | 1.83526300  | -0.92268800 |
| H | -1.28420900 | 1.74024400  | -2.55597800 |
| C | -2.89447500 | -1.94374000 | 1.41996400  |
| H | -3.04480100 | -2.96774200 | 1.07738100  |
| H | -1.94126500 | -1.81081100 | 1.91240100  |
| H | -3.68533200 | -1.69323600 | 2.12819900  |
| H | -4.32267300 | -0.89626700 | -2.11346500 |
| H | -5.67080400 | 0.09235000  | -1.53217800 |
| C | -0.59817500 | -2.42528200 | -0.15721200 |
| H | -1.44744400 | -2.85312200 | -0.69270600 |
| H | 0.31520200  | -2.79931500 | -0.61138900 |
| H | -0.60439300 | -2.77039000 | 0.87021700  |
| C | 0.10601600  | -0.62180300 | -1.62418600 |
| H | 1.04991400  | -1.16068000 | -1.61911100 |
| H | -0.51605900 | -1.02493700 | -2.42763100 |
| H | 0.33517100  | 0.40847200  | -1.85613300 |

### NHO 2c, TS2 ( $v = -131.28i \text{ (cm}^{-1}\text{)})$

O 1

|   |             |             |             |
|---|-------------|-------------|-------------|
| C | 0.15868000  | -0.28833600 | 1.00103800  |
| C | 0.74527600  | 1.10646200  | 0.86820600  |
| C | 1.80436500  | 1.44672000  | 0.02593900  |
| C | 0.12970100  | 2.11037600  | 1.61330100  |
| C | 2.21488100  | 2.76891300  | -0.08419000 |
| H | 2.31138900  | 0.67558700  | -0.53829300 |
| C | 0.53786400  | 3.43472800  | 1.50133500  |
| H | -0.68191100 | 1.83945400  | 2.27736700  |
| C | 1.57859600  | 3.76899000  | 0.64534600  |
| H | 3.04088300  | 3.02028000  | -0.73887300 |
| H | 0.04285900  | 4.20385800  | 2.08192300  |
| H | 1.90079200  | 4.79892000  | 0.55304100  |
| O | -0.32401700 | -0.59277300 | 2.10645600  |
| O | 1.78641500  | -1.25165700 | 0.76100700  |
| C | 1.93281900  | -2.24517900 | 1.71994300  |
| H | 1.83054800  | -3.25461000 | 1.29131000  |
| H | 1.17038300  | -2.14195900 | 2.50573700  |
| H | 2.91628300  | -2.18587900 | 2.20705800  |
| O | 3.53143100  | -1.40818700 | -1.13393400 |
| H | 2.83164700  | -1.38589400 | -0.41536800 |
| C | 4.73759500  | -0.95630000 | -0.55422300 |
| H | 5.06804800  | -1.64485100 | 0.23438100  |
| H | 4.59087700  | 0.02541300  | -0.08376600 |
| C | 5.80249400  | -0.85680000 | -1.62738200 |
| H | 5.49114000  | -0.15753800 | -2.40556200 |
| H | 6.74698300  | -0.50869200 | -1.20582400 |
| H | 5.96757000  | -1.83208600 | -2.08889600 |
| C | -3.75959300 | 1.05373400  | -1.41904600 |
| C | -4.62947100 | -0.17189600 | -1.35607000 |
| C | -4.45792700 | -0.75091600 | 0.02203600  |
| H | -4.12963200 | 1.83314000  | -0.74664400 |
| H | -3.72225600 | 1.46888200  | -2.42675000 |
| H | -4.86154100 | -0.07946200 | 0.78537200  |
| H | -4.96232500 | -1.71244300 | 0.11909900  |
| C | -2.05103000 | -0.33705700 | -0.30522900 |
| C | -0.58277300 | -0.87998100 | -0.26805600 |

### NHO 2c, TS3 ( $v = -164.36i \text{ (cm}^{-1}\text{)})$

O 1

|   |             |             |             |
|---|-------------|-------------|-------------|
| C | -0.46370700 | -0.56591200 | -0.81108100 |
| O | -0.36164000 | -1.17776900 | -1.88431300 |
| C | -3.91247700 | -2.58211800 | -0.76304100 |
| H | -4.42062400 | -2.51515600 | 0.20218500  |
| H | -3.25932500 | -3.45737400 | -0.73998900 |
| H | -4.66697500 | -2.73169700 | -1.53987600 |
| C | -3.08915600 | -1.32406700 | -1.02566300 |
| H | -2.57351600 | -1.43619100 | -1.99062400 |
| H | -3.77195600 | -0.46106000 | -1.12922600 |
| O | -2.16136900 | -1.11073900 | -0.01352400 |
| O | -3.47204300 | -0.25592000 | 2.06993700  |
| H | -2.94648300 | -0.60518200 | 1.28998600  |
| C | -4.70161800 | 0.23878900  | 1.59132000  |
| H | -5.29333900 | 0.57904500  | 2.44277400  |
| H | -4.56878800 | 1.08925500  | 0.91056400  |
| H | -5.27723500 | -0.52872700 | 1.06168200  |
| C | 3.66102300  | 0.92523300  | 1.26404800  |
| C | 4.55210200  | -0.25679300 | 0.99839900  |
| C | 4.20616900  | -0.75395400 | -0.37926000 |
| H | 3.91479300  | 1.76296100  | 0.60789600  |
| H | 3.74465800  | 1.26953600  | 2.29556500  |
| H | 4.46573600  | -0.01352000 | -1.14207900 |
| H | 4.73095400  | -1.67923100 | -0.61755100 |
| C | 1.85778200  | -0.45624500 | 0.29547200  |
| C | 0.41129200  | -1.04415600 | 0.41405800  |

|   |             |             |             |   |             |             |             |
|---|-------------|-------------|-------------|---|-------------|-------------|-------------|
| N | 2.77098600  | -1.05550700 | -0.47419900 | H | -1.10051400 | 2.77595600  | 0.11123300  |
| N | 2.24770200  | 0.57236000  | 1.05879200  | H | -1.01138500 | 1.84174200  | -1.39361500 |
| C | 1.38741300  | 1.60934300  | 1.63788500  | H | 2.70353400  | 1.68103500  | 1.01084300  |
| H | 1.89453800  | 2.55862800  | 1.46212700  | C | -3.51533300 | 0.58026500  | -0.26263900 |
| H | 0.42647600  | 1.65833000  | 1.15025500  | C | -4.23423100 | -0.75080600 | -0.36152900 |
| H | 1.27005300  | 1.46687600  | 2.71185200  | C | -3.21559000 | -1.71278800 | -0.93008400 |
| C | 2.51483200  | -1.91331500 | -1.63751100 | H | -4.15274600 | 1.38982500  | 0.08775600  |
| H | 1.47399700  | -1.88839700 | -1.93117600 | H | -3.10252200 | 0.86471100  | -1.23387000 |
| H | 3.11662900  | -1.50791500 | -2.45321000 | H | -3.46036500 | -2.75277500 | -0.70399500 |
| H | 2.85096400  | -2.93058200 | -1.43228400 | H | -3.18323700 | -1.61050900 | -2.01729500 |
| C | -0.64783600 | 0.94111700  | -0.89842600 | C | -1.49024800 | -0.54308400 | 0.42227900  |
| C | -1.65151000 | 1.67695600  | -0.27539900 | C | -0.11250200 | -0.40548700 | 0.94255100  |
| C | 0.32403400  | 1.61862100  | -1.63838000 | N | -1.83563200 | -1.48284400 | -0.45266700 |
| C | -1.66788700 | 3.06472600  | -0.37283100 | N | -2.42139700 | 0.42353600  | 0.68911300  |
| H | -2.40857500 | 1.15594000  | 0.29234300  | C | -2.81984500 | 0.74731300  | 2.06253300  |
| C | 0.31696500  | 3.00445200  | -1.72373600 | H | -3.86910200 | 0.47056200  | 2.19239700  |
| H | 1.09428000  | 1.04784000  | -2.14740300 | H | -2.24327700 | 0.18662800  | 2.78677300  |
| C | -0.68019300 | 3.73350300  | -1.08514000 | H | -2.71379600 | 1.81597500  | 2.25563300  |
| H | -2.45643100 | 3.62442100  | 0.11612800  | C | -0.93490700 | -2.48221000 | -1.03136100 |
| H | 1.08555400  | 3.51502000  | -2.29137900 | H | 0.05256600  | -2.06862900 | -1.15398300 |
| H | -0.69151200 | 4.81446700  | -1.15057800 | H | -0.93596200 | -3.38655800 | -0.42058600 |
| H | 5.59836900  | 0.04099700  | 1.04402100  | H | -1.31684000 | -2.72737800 | -2.02159900 |
| H | 4.38226100  | -1.04022000 | 1.73965100  | C | 0.06322300  | 0.58494600  | 2.09326700  |
| C | -0.21440200 | -0.69565800 | 1.78406500  | H | -0.45537100 | 1.52704900  | 1.94379200  |
| H | -0.93683900 | -1.47022600 | 2.02091900  | H | -0.23784800 | 0.14898600  | 3.04985400  |
| H | 0.54645600  | -0.68921100 | 2.56582200  | H | 1.12555300  | 0.80688700  | 2.17586400  |
| H | -0.75907500 | 0.24239700  | 1.80104800  | C | 0.54590300  | -1.71692700 | 1.40376000  |
| C | 0.49083600  | -2.58418800 | 0.42464400  | H | -0.13313000 | -2.27710400 | 2.05472100  |
| H | 1.10910800  | -2.91403400 | 1.26286400  | H | 0.88446700  | -2.37993600 | 0.61548600  |
| H | -0.52650200 | -2.94043200 | 0.57269500  | H | 1.42975200  | -1.46608000 | 1.99231100  |
| H | 0.86120500  | -3.03229200 | -0.48594800 | H | -4.56914700 | -1.06008100 | 0.63059800  |

### NHO 2c, TS4 ( $v = -198.32i \text{ (cm}^{-1}\text{)})$

0 1

|   |             |             |             |
|---|-------------|-------------|-------------|
| C | 3.06845000  | 0.76711400  | 0.56242300  |
| C | 4.38568400  | 0.37216300  | 0.77275000  |
| C | 4.87882700  | -0.77711900 | 0.16839000  |
| C | 2.73531800  | -1.11740000 | -0.87477800 |
| C | 4.04855700  | -1.51721900 | -0.66612900 |
| C | 2.21978900  | 0.01576500  | -0.24969600 |
| H | 5.03058600  | 0.97193500  | 1.40421500  |
| H | 5.90423900  | -1.08487200 | 0.33269000  |
| H | 4.42802300  | -2.40313600 | -1.16131500 |
| H | 2.09810700  | -1.67594300 | -1.54954400 |
| C | 0.75724500  | 0.38830500  | -0.51414700 |
| O | 0.27280400  | 0.01872800  | -1.63161900 |
| O | 0.67069100  | 1.79305500  | -0.21469800 |
| C | -0.44848400 | 2.49233400  | -0.72381500 |

|   |            |            |             |
|---|------------|------------|-------------|
| H | 0.62767000 | 3.44336300 | -2.32867700 |
|---|------------|------------|-------------|
